# Supplementary material for: Trans-ancestral genome-wide association study of longitudinal pubertal height growth and shared heritability with adult health outcomes
Source: Genome Biol. 2024 Jan 16;25:22. doi: 10.1186/s13059-023-03136-z (PMC10790528; doi:10.1186/s13059-023-03136-z)
Supplement: Supplementary file 1 — Additional file 1: Table 1 and tables S1-S11. [file 13059_2023_3136_MOESM1_ESM.xlsx]

## Sheet: Tables
Table of contents-- Tables
Table 1	Trans-ethnic GWAS results.
S1	Cohort study information.
S2	GWAS results by ancestry.
S3	SNP-based heritability estimates by LDSC.
S4	SNPs queried in Phenoscanner.
S5	Phenoscanner results.
S6	Functionally relevant candidate gene annotations.
S7	Genetic correlation between pubertal growth phenotypes as determined by LDSC.
S8	Proportion of the phenotypic variance explained in the CAG cohort by the PRS.
S9	PheWAS in the Penn Medicine Biobank.
S10	Validation in the UK Biobank.
S11	Lambda values.

## Sheet: Table 1.  Trans-ethnic results
											Trans-ethnic: GWAMA				MR_Mega
Signal	Phenotype	Sex	MarkerName	Chromosome	Position (GRCh37)	EA	NEA	EAF	Nsample	Ncohort	beta	SE	P	sample size	P_MR_Mega	P_ancestry_het	#SNPs_95_cred_set	Nearest Gene	Functional candidate genes
1	I	M+F	rs67807996	1	149995265	A	G	0.312584	35014	39	0.066713	0.009355	1.04e-12	34534	5.98166e-11	0.143607	1	OTUD7B	OTUD7B
2	I	M+F	rs823094	1	205689807	G	T	0.392957	37407	39	-0.038336	0.007881	1.17e-06	36927	2.30232e-08	0.000213003	20	RAB7L1	NUCKS1
3	I	F	rs1346789	2	56092052	C	T	0.23079	23173	24	-0.071316	0.011358	1.03e-09	23173	4.28e-08	0.635493	11	EFEMP1	EFEMP1, PNPT1
3	I	M+F	rs3791679	2	56096892	G	A	0.239465	39411	40	-0.068477	0.0088	7.52e-15	38931	1.02354e-12	0.307503	3
4	I	M+F	rs6763927	3	141140366	T	A	0.457355	42928	45	0.049268	0.007097	4.01e-12	42448	4.9625e-10	0.339386	16	RASA2	ZBTB38
5	I	M+F	rs7623981	3	172135334	C	T	0.379397	40986	44	-0.050134	0.007604	4.46e-11	40506	2.66849e-09	0.217223	6	GHSR	GHSR
6	I	M+F	rs6817306	4	17868058	C	T	0.148117	39856	41	-0.072296	0.010765	1.93e-11	39376	1.91247e-10	0.037864	6	NCAPG	SLIT2
7	IV	F	rs1712374	4	82154710	C	T	0.380537	21200	19	0.081569	0.012466	9.67e-11	21200	4.94097e-09	0.525437	27	PRKG2	PRKG2
7	IV	M+F	rs1443537	4	82150880	A	C	0.334143	39039	34	0.073195	0.009493	1.31e-14	39039	4.1657e-12	0.59041	27
8	IV	F	rs6537315	4	145724712	A	G	0.362652	21645	20	-0.066292	0.01239	1.21e-07	21645	4.93365e-08	0.00925716	11	HHIP	HHIP
8	I	M+F	rs2131354	4	145599908	A	G	0.474293	40541	43	0.043703	0.007456	4.72e-09	40061	2.74879e-08	0.0475814	40
9	I	M+F	rs409012	5	77375625	C	A	0.220145	41317	43	-0.052566	0.008705	1.6e-09	40837	3.97968e-08	0.116376	75	TBCA	AP3B1, OTP
10	IV	M+F	rs2814994	6	34620153	A	T	0.16883	39719	35	0.069558	0.011529	1.65e-09	39719	2.78548e-08	0.108483	34	C6orf106 (ILRUN)	C6orf106 (ILRUN)
11	III	M+F	rs2181193	6	105442327	A	T	0.673917	19472	26	-0.07909	0.011031	7.81e-13	19472	9.59218e-11	4.53661e-11	17	LIN28B	LIN28B
11	V	M+F	rs7766336	6	105388405	G	T	0.684232	40667	36	-0.005707	0.00186	0.002158	40667	6.50414e-10	1.00609e-08	10
11	VI	M+F	rs314263	6	105392745	T	C	0.687874	39893	36	0.006974	0.001407	7.25e-07	39893	1.93147e-09	4.41472e-05	38
12	I	F	rs1159619	6	126801144	A	C	0.459726	21466	22	0.063361	0.009883	4.56e-10	21466	2.97e-09	0.121672	129	CENPW	RSPO3
12	I	M+F	rs1361107	6	126767511	C	A	0.461994	40003	42	0.059801	0.007575	3.05e-15	39523	1.64434e-13	0.0873454	123
13	I	M+F	rs9496369	6	142724918	T	C	0.330181	42928	45	-0.051549	0.007709	2.36e-11	42448	1.99665e-09	0.211125	33	ADGRG6	ADGRG6
13	IV	M+F	rs7770386	6	142775657	T	C	0.349025	39833	35	-0.05203	0.009123	1.2e-08	39833	2.51401e-09	0.00165326	14
14	I	F	rs2167733	8	78110734	A	G	0.243877	23618	25	0.072845	0.010662	3.08e-11	23618	2.63e-09	0.929862	39	PEX2	HNF4G
14	I	M+F	rs10103623	8	78106082	G	A	0.244243	42295	45	0.071943	0.008248	2.87e-18	41815	2.30198e-15	0.699423	36
15	III	F	rs72829034	10	64129318	A	C	0.079446	6660	10	-0.005006	0.032792	0.878939	6660	1.30408e-09	3.05148e-10	1	ZNF365	ARID5B
16	V	M+F	rs16911905	11	5249290	C	G	0.0991835	26380	21	0.075734	0.016824	6.84e-06	26380	1.31647e-09	4.02975e-06	1	HBB
17	I	M+F	rs2724648	12	11858191	T	C	0.613894	43373	46	-0.049051	0.007272	1.58e-11	42893	6.62009e-09	0.941335	12	ETV6	ETV6
18	VI	M+F	rs2364232	12	93994827	C	A	0.252762	42873	40	0.008406	0.001182	1.2e-12	42873	1.64624e-11	0.0754339	5	SOCS2	SOCS2
19	I	M+F	rs28481863	12	123902361	A	G	0.772694	41317	43	-0.054448	0.008979	1.37e-09	40837	4.30992e-08	0.15793	155	KMT5A
19	IV	M+F	rs28406193	12	123891865	G	T	0.73529	41736	38	-0.060631	0.009841	7.43e-10	41736	1.1388e-08	0.0900602	9
20	III	F	rs36103703	14	56284991	G	A	0.179024	5929	11	-0.035183	0.024769	0.156473	5929	3.82326e-09	2.4257e-09	4	KTN1	KTN1
21	I	M+F	rs11634560	15	67467830	G	T	0.24867	38930	41	0.057555	0.008836	7.58e-11	38450	1.97985e-08	0.944861	9	IQCH	SMAD3
22	I	M+F	rs10520573	15	84591575	G	A	0.570168	41431	45	0.049007	0.007425	4.24e-11	40951	4.92279e-09	0.469186	69	UBE2Q2L	ADAMTSL3
23	I	M+F	rs71385734	16	2160503	G	T	0.201947	37390	38	-0.058361	0.010058	6.72e-09	36910	8.595e-09	0.00879504	8	PKD1	PKD1
24	I	F	rs7238093	18	20728158	A	T	0.202331	21683	23	-0.080814	0.011988	5.58e-11	21683	4.04e-09	0.859502	15	CABLES1
24	IV	F	rs8094261	18	20746728	C	G	0.781283	21645	20	0.094703	0.014284	5.46e-11	21645	4.89297e-09	0.788646	13
24	I	M+F	rs7244464	18	20729714	C	A	0.774004	42601	46	0.075196	0.008589	2.16e-18	42121	3.70017e-15	0.866745	12
24	IV	M+F	rs7238093	18	20728158	T	A	0.795595	42740	40	0.080678	0.010635	3.45e-14	42740	9.06993e-12	0.513735	13
25	I	M	rs143384	20	34025756	G	A	0.442875	19755	21	0.06288	0.011354	5.35e-08	19755	1.21529e-08	0.00564588	59	GDF5	GDF5
25	I	M+F	rs143384	20	34025756	G	A	0.454458	41711	44	0.059641	0.007512	2.14e-15	41231	1.12412e-13	0.0733948	1
25	IV	M+F	rs143384	20	34025756	G	A	0.488214	41850	38	0.063398	0.009202	5.81e-12	41850	4.05915e-10	0.239614	67
26	I	M+F	rs1326022	20	54844025	G	A	0.690368	37469	39	-0.052831	0.008471	4.61e-10	36989	4.25426e-09	0.0482684	19	MC3R	MC3R

## Sheet: S1 Cohort info
S1. Cohort study information
Study Name / acronym	Full Study name	Population ancestry	Ancestry group	Sex	Age at peak height velocity (yrs)	Peak height velocity (cm/yr)	SD of parameter "b"	Min age	Max age	ages of height measurements in this interval	range, average and median # of measurements per individual	Genotyping array	Post genotyping QC	Imputation reference panel	If HRC, location of imputation (Sanger/Michigan)	Imputation parameters	GWAS analysis program	Covariates	Notes- Please note if modeled together with another cohort (and name of other cohort)
ALSPAC	Avon Longitudinal Study of Parents and Children	Caucasian European (British)	EUR	females	11.5	8	0.73	7	19.83	7.5, 9.9, 10.6, 11.7, 12.8, 13.8, 15.4, 17.8	Range = 1 to 8, Mean = 6.1, Median = 7	Illumina Human Hap 550-quad	Individuals were excluded on the basis of gender mismatches; minimal or excessive heterozygosity; disproportionate levels of individual missingness (>3%) and insufficient sample replication (IBD < 0.8). Population stratification was assessed by multidimensional scaling analysis and compared with Hapmap II (release 22) European descent (CEU), Han Chinese, Japanese and Yoruba reference populations;…	HRC 1.0	Sanger	ShapeIT (v2.r644)	SNPTEST	First 10 PCs, age (Analysis I); First 10 PCs (Analysis II-VI)
ALSPAC	Avon Longitudinal Study of Parents and Children	Caucasian European (British)	EUR	males	13.5	10.2	0.72	6.8	19.9	7.5, 9.9, 10.6, 11.7, 12.8, 13.8, 15.4, 17.8	Range = 1 to 8, Mean = 5.7, Median = 7	Illumina Human Hap 550-quad	Individuals were excluded on the basis of gender mismatches; minimal or excessive heterozygosity; disproportionate levels of individual missingness (>3%) and insufficient sample replication (IBD < 0.8). Population stratification was assessed by multidimensional scaling analysis and compared with Hapmap II (release 22) European descent (CEU), Han Chinese, Japanese and Yoruba reference populations;…	HRC 1.0	Sanger	ShapeIT (v2.r644)	SNPTEST	First 10 PCs, age (Analysis I); First 10 PCs (Analysis II-VI)
B58C	British 1958 birth cohort (B58C-WTCCC)	Caucasian European (British)	EUR	females	11.5	8.1	0.71	7	16	2016-07-11	only individuals with all 3 measurements were included	Illumina 1M	Sample call rate <95%, duplicate samples, gender discrpancies, crytpic relatedness, excess heterozygosity, SNP call rate < 95% for MAF>5% and <99% for MAF <5%, SNP HWE < 10-6; SNPs with MAF<1% removed	HRC r1.1 2016	Michigan	ShapeIT	rvtest	none	Analyses IV, V & VI only
B58C	British 1958 birth cohort	Caucasian European (British)	EUR	females	NA	NA	NA	7	45	NA		Illumina 550k_v1, 550k_v3 or 610k (3 non-overlapping subsets)	Duplicates removed; p_HWE <10-4 removed; Sample call rate < 95% removed; SNPs with discrepant allele frequencies across the 3 subsets removed; chrX SNPs with discrepant allele frequencies in males & females removed	HRC r1.1 2016	Michigan	Phasing: EAGLE; Population: EUR; Mode: Quality control and Imputation	SNPTEST v2	Four PCs	Analyses I & II only - no late pubertal measures nor SITAR
B58C	British 1958 birth cohort (B58C-WTCCC)	Caucasian European (British)	EUR	males	12.5	9.5	0.56	7	16	2016-07-11	only individuals with all 3 measurements were included	Illumina 1M	Sample call rate <95%, duplicate samples, gender discrpancies, crytpic relatedness, excess heterozygosity, SNP call rate < 95% for MAF>5% and <99% for MAF <5%, SNP HWE < 10-6; SNPs with MAF<1% removed	HRC r1.1 2016	Michigan	ShapeIT	rvtest	none	Analyses IV, V & VI only
B58C	British 1958 birth cohort	Caucasian European (British)	EUR	males	NA	NA	NA	7	45	NA		Illumina 550k_v1, 550k_v3 or 610k (3 non-overlapping subsets)	Duplicates removed; p_HWE <10-4 removed; Sample call rate < 95% removed; SNPs with discrepant allele frequencies across the 3 subsets removed; chrX SNPs with discrepant allele frequencies in males & females removed	HRC r1.1 2016	Michigan	Phasing: EAGLE; Population: EUR; Mode: Quality control and Imputation	SNPTEST v2	Four PCs	Analyses I & II only - no late pubertal measures nor SITAR
BMDCS	Bone Mineral Density in Childhood Study	African American	AFR	females	11	8.3	0.72	5	20	5-20, annual	Range=1-7	Illumina OmniExpress	Duplicates removed; HWE 10-6; Sample call rate < 95%; gender discrepancies removed; monomorphic SNPs removed	HRC r1.1 2016	Michigan	Phasing: ShapeIT v2.r790; Population: MIXED; Mode: Quality control and Imputation	SNPTEST	First 4 PCs, age (Analysis I)
BMDCS	Bone Mineral Density in Childhood Study	Caucasian American	EUR	females	11.6	7.9	0.75	5	20	5-20, annual	Range=1-7	Illumina OmniExpress	Duplicates removed; HWE 10-6; Sample call rate < 95%; gender discrepancies removed; monomorphic SNPs removed	HRC r1.1 2016	Michigan	Phasing: ShapeIT v2.r790; Population: MIXED; Mode: Quality control and Imputation	SNPTEST	First 4 PCs, age (Analysis I)
BMDCS	Bone Mineral Density in Childhood Study	African American	AFR	males	13.1	9.5	0.76	5	20	5-20, annual	Range=1-7	Illumina OmniExpress	Duplicates removed; HWE 10-6; Sample call rate < 95%; gender discrepancies removed; monomorphic SNPs removed	HRC r1.1 2016	Michigan	Phasing: ShapeIT v2.r790; Population: MIXED; Mode: Quality control and Imputation	SNPTEST	First 4 PCs, age (Analysis I)
BMDCS	Bone Mineral Density in Childhood Study	Caucasian American	EUR	males	13.4	10	0.75	5	20	5-20, annual	Range=1-7	Illumina OmniExpress	Duplicates removed; HWE 10-6; Sample call rate < 95%; gender discrepancies removed; monomorphic SNPs removed	HRC r1.1 2016	Michigan	Phasing: ShapeIT v2.r790; Population: MIXED; Mode: Quality control and Imputation	SNPTEST	First 4 PCs, age (Analysis I)
CHOP	The Children's Hospital of Philadelphia Cohort	African American	AFR	females	10.7	7.9	0.8	5	20	2018-05-20	Range=1-206, Mean=9.7, Median=6	Illumina 550,610	Duplicates removed; HWE 10-6; Sample call rate < 95%; gender discrepancies removed; maf < 1%; SNP call rate < 95%	HRC r1.1	Sanger	Phasing: EAGLE; Population: Mixed; Imputation: PBWT	PLINK v2.00	3 PCs
CHOP	The Children's Hospital of Philadelphia Cohort	Hispanic American	AMR	females	11	7.4	0.99	5	20	2018-05-20	Range=1-206, Mean=9.7, Median=6	Illumina 550,610	Duplicates removed; HWE 10-6; Sample call rate < 95%; gender discrepancies removed; maf < 1%; SNP call rate < 95%	HRC r1.1	Sanger	Phasing: EAGLE; Population: Mixed; Imputation: PBWT	PLINK v2.00	3 PCs
CHOP	The Children's Hospital of Philadelphia Cohort	Caucasian American	EUR	females	11.4	8.2	0.57	5	20	2018-05-20	Range=1-206, Mean=9.7, Median=6	Illumina 550,610	Duplicates removed; HWE 10-6; Sample call rate < 95%; gender discrepancies removed; maf < 1%; SNP call rate < 95%	HRC r1.1	Sanger	Phasing: EAGLE; Population: Mixed; Imputation: PBWT	PLINK v2.00	3 PCs
CHOP	The Children's Hospital of Philadelphia Cohort	Hispanic American	AMR	males	12.8	8.9	0.84	5	20	2018-05-20	Range=1-206, Mean=9.7, Median=6	Illumina 550,610	Duplicates removed; HWE 10-6; Sample call rate < 95%; gender discrepancies removed; maf < 1%; SNP call rate < 95%	HRC r1.1	Sanger	Phasing: EAGLE; Population: Mixed; Imputation: PBWT	PLINK v2.00	3 PCs
CHOP	The Children's Hospital of Philadelphia Cohort	Caucasian American	EUR	males	13.1	9.6	0.61	5	20	2018-05-20	Range=1-259, Mean=9.8, Median=6	Illumina 550,610	Duplicates removed; HWE 10-6; Sample call rate < 95%; gender discrepancies removed; maf < 1%; SNP call rate < 95%	HRC r1.1	Sanger	Phasing: EAGLE; Population: Mixed; Imputation: PBWT	PLINK v2.00	3 PCs
CHOP	The Children's Hospital of Philadelphia Cohort	African American	AFR	males	12.7	8.8	0.68	5	20	2018-05-20	Range=1-259, Mean=9.8, Median=6	Illumina 550,610	Duplicates removed; HWE 10-6; Sample call rate < 95%; gender discrepancies removed; maf < 1%; SNP call rate < 95%	HRC r1.1	Sanger	Phasing: EAGLE; Population: Mixed; Imputation: PBWT	PLINK v2.00	3 PCs
CHS	Children's Health Study	Hispanic American	AMR	females	11.1	7.8	0.86	5	20	6.5, 7.1, 8, 9.1, 10.2, 11.4, 13.2, 14.9	Range=1-8, Mean=6.2, Median=7.0	Illumina HumanHap550, HunmanHap550-Duo or Human610-Quad BeadChip microarrays	Duplicates removed; HWE 10-3; Sample call rate < 95%; gender discrepancies removed	HRC r1.1 2016	Michigan	Phasing: ShapeIT v2.r790; Population: MIXED; Mode: Quality control and Imputation	EPACTS (EMMAX)	First 5 PCs, age
CHS	Children's Health Study	Caucasian American	EUR	females	11.7	7.9	0.84	5	20	6.6, 7.2, 8, 9, 10.1, 11.3, 13.2, 15	Range=1-8, Mean=6.2, Median=7.0	Illumina HumanHap550, HunmanHap550-Duo or Human610-Quad BeadChip microarrays	Duplicates removed; HWE 10-3; Sample call rate < 95%; gender discrepancies removed	HRC r1.1 2016	Michigan	Phasing: ShapeIT v2.r790; Population: MIXED; Mode: Quality control and Imputation	EPACTS (EMMAX)	First 5 PCs, age
CHS	Children's Health Study	Hispanic American	AMR	males	13.1	9.7	0.75	5	20	6.6, 7.2, 8.2, 9.3, 10.3, 11.5, 13.4, 15.1	Range=1-8, Mean=5.8, Median=6.0	Illumina HumanHap550, HunmanHap550-Duo or Human610-Quad BeadChip microarrays	Duplicates removed; HWE 10-3; Sample call rate < 95%; gender discrepancies removed	HRC r1.1 2016	Michigan	Phasing: ShapeIT v2.r790; Population: MIXED; Mode: Quality control and Imputation	EPACTS (EMMAX)	First 5 PCs, age
CHS	Children's Health Study	Caucasian American	EUR	males	13.6	10.1	0.81	5	20	6.8, 7.3, 8.2, 9.2, 10.2, 11.4, 13.4, 15	Range=1-8, Mean=6.0, Median=6.0	Illumina HumanHap550, HunmanHap550-Duo or Human610-Quad BeadChip microarrays	Duplicates removed; HWE 10-3; Sample call rate < 95%; gender discrepancies removed	HRC r1.1 2016	Michigan	Phasing: ShapeIT v2.r790; Population: MIXED; Mode: Quality control and Imputation	EPACTS (EMMAX)	First 5 PCs, age
CLHNS	Cebu Longitudinal Health and Nutrition Survey	East Asian (Filipino)	EAS	females	NA	NA	NA	8	22	Cohort was measured at age 8, age 11, age 15, age 18, and age 21 (±1 year)	Range 1-5 measurements Mean measurements = 4.9 Median measurements = 5	MetaboChip (Illumina)	Exclude Samples: call rates<98% Exclude Variants: SNP call rates < 97%, HWE deviations (p<10E-6), Mendelian inheritance errors (combined 3 or more discrepancies among 79 duplicate pairs and 4 HapMap CEPH trios genotyped on the MetaboChip)	1000G	Michigan	Eagle v2.3 (phased output)	PLINK	Pheno1: age, family assets at time of measurement, family household income at time of measurement, firstborn (Y/N) Pheno2: family assets at age 8, family household income at age 8, firstborn (Y/N) Pheno3: family assets at age 14, family income at age 14, firstborn (Y/N)	SITAR modeling not complete; models would not converge given the age at sampling for CLHNS data, and we could not identify an appropriate cohort to strengthen modeling. CLHNS data was collected at a time of considerable transition in diet composition in the area and therefore even other EAS cohorts may not be appropriate for joint modeling. The covariates included in the model reflect considerabl…
CLHNS	Cebu Longitudinal Health and Nutrition Survey	East Asian (Filipino)	EAS	males	NA	NA	NA	7	22	Cohort was measured at age 8, age 11, age 15, age 18, and age 21 (±1 year)	Range 1-5 measurements Mean measurements = 4.9 Median measurements = 5	MetaboChip (Illumina)	Exclude Samples: call rates<98% Exclude Variants: SNP call rates < 97%, HWE deviations (p<10E-6), Mendelian inheritance errors (combined 3 or more discrepancies among 79 duplicate pairs and 4 HapMap CEPH trios genotyped on the MetaboChip)	1000G	Michigan	Eagle v2.3 (phased output)	PLINK	Pheno1: age, family assets at time of measurement, family household income at time of measurement, firstborn (Y/N) Pheno2: family assets at age 8, family household income at age 8, firstborn (Y/N) Pheno3: family assets at age 14, family income at age 14, firstborn (Y/N)	SITAR modeling not complete; models would not converge given the age at sampling for CLHNS data, and we could not identify an appropriate cohort to strengthen modeling. CLHNS data was collected at a time of considerable transition in diet composition in the area and therefore even other EAS cohorts may not be appropriate for joint modeling. The covariates included in the model reflect considerabl…
GENR	Generation R	Caucasian Australian	EUR	females	NA	NA	NA	9.02	10.99	NA	1	Illumina 610 Quad and 660 platforms	SNP call rate < 98%, highly significant departures from Hardy-Weinberg equilibrium (P < 1*10–6), or low Minor Allele Frequencies (MAF < 0.1%) were used to determine which SNPs to include in the imputation step.	HRC release 1	Michigan Imputation Server	SHAPEIT	GRIMP (rvtest)	First 4 principal components, age at measurement (Analysis 1)
GINIplus&LISA	German Infant Nutritional Intervention plus environmental and genetic influences on allergy development & Influence of Life-style related factors on the development of the Immune System and Allergies in East and West Germany	Caucasian European	EUR	females	NA	NA	NA	9.77	10.98	NA	1	Affymetrix 5.0 / Affymetrix 6.0	HWE<0.00001; Sample call rate < 95%; gender discrepancies removed; monomorphic SNPs removed	HRC r1.1 2016	Michigan	Phasing: ShapeIT; Population: EUR; Mode: Quality control and Imputation	rvtests	age
HBCS	Helsinki Birth Cohort Study	Caucasian European (Finnish)	EUR	females	11.8	6.6	0.75	5,0	20	5,6,7,8,9,10,11,12,20	Range=1-9; Mean=8.23; Median=8	Illumina 670K chip	Standard methods applied both sample- and variant-wise to genotyped chip data	SISu v2 with 2,690 hcWGS and 5,092 WES Finnish genomes		Eagle 2.3,Impute 2.3.1 # All methods done to the data so far also preimputed methods	snptest_v2.5.2	No	SITAR modeling based on combined data from NFBC66 and HBCS
HBCS	Helsinki Birth Cohort Study	Caucasian European (Finnish)	EUR	males	13.8	8.2	0.7	5,0	20	5,6,7,8,9,10,11,12,20	Range=1-9; Mean=8.21; Median=8	Illumina 670K chip	Standard methods applied both sample- and variant-wise to genotyped chip data	SISu v2 with 2,690 hcWGS and 5,092 WES Finnish genomes		Eagle 2.3,Impute 2.3.1 # All methods done to the data so far also preimputed methods	snptest_v2.5.2	No	SITAR modeling based on combined data from NFBC66 and HBCS
INMA	Infancia y Medio Ambiente	Caucasian European (Spainish)	EUR	females	10.02 (not SITAR-derived)	NA	NA	8.5	11.49	NA	1	Illumina Omni1-Quad
INMA	Infancia y Medio Ambiente	Caucasian European (Spainish)	EUR	males	11.4	NA	NA	10.5	12.64	NA	1	Illumina Omni1-Quad	FIltered genetic variants different positions between INMA and 1000Gv3, filtered flipped genetic variants (flipped alleles with diff > 0.10) (e.g.: A G and T C), filtered genetic variants with large difference in A1 frequency (>0.10), filtered variants not found by rs-number in 1000G. After a first imputation,some variants had to be removed that caused the imputation to fail (SNPs with strand swi…	HRC r1.1 2016	Michigan	Phasing: ShapeIT v2.r790; Population: EUR; Mode: Quality control & imputation	SNPtest	First 4 PCs, age, cohort (Analysis I)	As we only performed Analysis I, we did not calculate peak height velocity nor SD parameter b. Also, regarding # of height measurements in this interval, as we only performed Analysis 1, just one measure was taken into account
Mexico		Hispanic American	AMR	females	NA	NA	NA	9	11	NA	1	Affymetrix Axiom® Genome-Wide LAT1 Array	Duplicates removed; HWE 10-6; Genotype call rate < 98%, Sample call rate < 95%; gender discrepancies removed; monomorphic SNPs removed		Michigan	Phasing: ShapeIT v2.r790; Population: MIXED; Mode: Quality control and Imputation	PLINK	age, first 5 PCs
Mexico		Hispanic American	AMR	males	NA	NA	NA	11	13	NA	1	Affymetrix Axiom® Genome-Wide LAT1 Array	Duplicates removed; HWE 10-6; Genotype call rate < 98%, Sample call rate < 95%; gender discrepancies removed; monomorphic SNPs removed		Michigan	Phasing: ShapeIT v2.r790; Population: MIXED; Mode: Quality control and Imputation	PLINK	age, first 5 PCs
NFBC1966	Northern Finland Birth Cohort 1966	Caucasian European (Finnish)	EUR	females	12.1	8.7	0.79	5 (60)	20 (240)	5,6,7,8,9,10,11,12,13,16	Range=1-30, Mean=10.92, Median=11	Illumina HumanCNV370DUO Analysis BeadChip	Duplicates removed; HWE < 0,0001; Sample call rate < 95%; gender discrepancies removed	HRC r1.1 2016	Michigan	Eagle v2.3 for autosomes and shapeIT for chrX	SNPTEST	First 10 PCs
NFBC1966	Northern Finland Birth Cohort 1966	Caucasian European (Finnish)	EUR	males	14.1	9.9	0.97	5 (60)	20 (240)	5,6,7,8,9,10,11,12,13,16	Range=1-30, Mean=10.92, Median=11	Illumina HumanCNV370DUO Analysis BeadChip	Duplicates removed; HWE < 0,0001; Sample call rate < 95%; gender discrepancies removed	HRC r1.1 2016	Michigan	Eagle v2.3 for autosomes and shapeIT for chrX	SNPTEST	First 10 PCs
NFBC1986	Northern Finland Birth Cohort 1986	Caucasian European (Finnish)	EUR	females	11.7	7.7	0.75	5 (60)	20 (240)	5,6,7,8,9,10,11,12,13,16	Range=1-27, Mean=9.24, Median=9	Human Omni Express Exome 8v1,2	Duplicates removed; HWE < 0,0001; Sample call rate < 99%; gender discrepancies removed	HRC r1.1 2016	Michigan	Eagle v2.3 for autosomes and shapeIT for chrX	SNPTEST	First 4 PCs, nonrandom effect
NFBC1986	Northern Finland Birth Cohort 1986	Caucasian European (Finnish)	EUR	males	13.4	10.2	0.85	5 (60)	20 (240)	5,6,7,8,9,10,11,12,13,16	Range=1-27, Mean=9.24, Median=9	Human Omni Express Exome 8v1,2	Duplicates removed; HWE < 0,0001; Sample call rate < 99%; gender discrepancies removed	HRC r1.1 2016	Michigan	Eagle v2.3 for autosomes and shapeIT for chrX	SNPTEST	First 4 PCs, nonrandom effect
NSHD	MRC National Survey of Health and Development	Caucasian European (British)	EUR	females	10.6	6.3	0.58	2	26	2, 4, 6, 7, 11, 15, 20, 26		Illumina DrugDev Consortium Array	Indv callrate > 95%, SNP call rate > 95%, remove duplicate samples, remove gender discrepancies, remove samples with excess heterozygosity, ethnicity verification with PCA, SNP HWE < 10-6	Phase 3 1KG and HRC	Michigan	Eagle	GEMMA	None
NSHD	MRC National Survey of Health and Development	Caucasian European (British)	EUR	females	11.7	7.2	0.77	NSHD: as above/ALSPAC; 5	NSHD: as above/ALSPAC: 20	NSHD: as above/ALSPAC: 5-13 annually, 15,17		Illumina DrugDev Consortium Array	Indv callrate > 95%, SNP call rate > 95%, remove duplicate samples, remove gender discrepancies, remove samples with excess heterozygosity, ethnicity verification with PCA, SNP HWE < 10-6	Phase 3 1KG and HRC	Michigan	Eagle	GEMMA	None	Analyses IV - VI results "_joint" modelled with ALSPAC
NSHD	MRC National Survey of Health and Development	Caucasian European (British)	EUR	males	10.6	6.4	~0	2	26	2, 4, 6, 7, 11, 15, 20, 26		Illumina DrugDev Consortium Array	Indv callrate > 95%, SNP call rate > 95%, remove duplicate samples, remove gender discrepancies, remove samples with excess heterozygosity, ethnicity verification with PCA, SNP HWE < 10-6	Phase 3 1KG and HRC	Michigan	Eagle	GEMMA	None
NSHD	MRC National Survey of Health and Development	Caucasian European (British)	EUR	males	13.5	9.2	0.77	NSHD: as above/ALSPAC; 5	NSHD: as above/ALSPAC: 20	NSHD: as above/ALSPAC: 5-13 annually, 15,17		Illumina DrugDev Consortium Array	Indv callrate > 95%, SNP call rate > 95%, remove duplicate samples, remove gender discrepancies, remove samples with excess heterozygosity, ethnicity verification with PCA, SNP HWE < 10-6	Phase 3 1KG and HRC	Michigan	Eagle	GEMMA	None	Analyses IV - VI results "_joint" modelled with ALSPAC
NTR	The Netherlands Twin Register	Caucasian European (Dutch)	EUR	females	11.8	7.3	0.73	5	20	5,7,10,12,14,16,18	Range=3-10, Mean=5.53, Median=5.5	Affymetrix 6.0	HWE p< 10-5, SNP Callrate > 95%, SNP Mendelian error rate < 1%, Sample Callrate > 90%, -0.075 < Heterozygosity Plink F < 0.075, Gender and IBS confirmed.	HRC r1.1 2016	Michigan	Phasing: ShapeIT v2.r790; Population: MIXED; Mode: Quality control and Imputation	GCTA	First 4 PCs, age (Analysis I), GRM for relatedness
NTR	The Netherlands Twin Register	Caucasian European (Dutch)	EUR	males	13.7	9	0.78	5	20	5,7,10,12,14,16,18	Range=3-10, Mean=5.53, Median=5.5	Affymetrix 6.0	HWE p< 10-5, SNP Callrate > 95%, SNP Mendelian error rate < 1%, Sample Callrate > 90%, -0.075 < Heterozygosity Plink F < 0.075, Gender and IBS confirmed.	HRC r1.1 2016	Michigan	Phasing: ShapeIT v2.r790; Population: MIXED; Mode: Quality control and Imputation	GCTA	First 4 PCs, age (Analysis I), GRM for relatedness
Raine Study	The Raine Study	Caucasian Australian	EUR	females	11.2	7.6	0.68	5	20	5,8,10,14,16,20	*Range=1-6, Mean=4.06, Median=4.00	Illumina Human 660W Quad BeadChip	Removed: Duplicates and plate controls; Gender discrepency when compared to core data; Individual level callrate <0.97; Cryptic relatedness (IBD) Pi>0.1875, SNP Callrate <0.95 with MAF >=0.05; SNP Callrate <0.99 with MAF <0.05, HWE p <1E-06, heterozygosity h>0.32, A/T and C/G ambiguous SNPs, MAF <0.01, SNPs not in Build37	HRC r1.1 2016	Michigan	Phasing: ShapeIT v2.r790; Population: MIXED; Mode: Quality control and Imputation	ProbAbel	first two PCs, age	SITAR modelling based on combined data from Raine Study and NICHD BMDCS	*counts based on Raine Study
Raine Study	The Raine Study	Caucasian Australian	EUR	males	13.6	10.9	0.62	5	20	5,8,10,14,16,20	*Range=1-6, Mean=4.02, Median=4.00	Illumina Human 660W Quad BeadChip	Removed: Duplicates and plate controls; Gender discrepency when compared to core data; Individual level callrate <0.97; Cryptic relatedness (IBD) Pi>0.1875, SNP Callrate <0.95 with MAF >=0.05; SNP Callrate <0.99 with MAF <0.05, HWE p <1E-06, heterozygosity h>0.32, A/T and C/G ambiguous SNPs, MAF <0.01, SNPs not in Build37	HRC r1.1 2016	Michigan	Phasing: ShapeIT v2.r790; Population: MIXED; Mode: Quality control and Imputation	ProbAbel	first two PCs, age	SITAR modelling based on combined data from Raine Study and NICHD BMDCS	*counts based on Raine Study
SCORM	Singapore Cohort Study of the Risk Factors for Myopia	East Asian (Singapore)	EAS	females	10.5	7.8	0.85	7	19	7,8,9,10,11,12,13,14,15,16,17,18,19	Range = 1-6, Mean = 4.148, Median = 4.5	Illumina HumanHap550v3_A	Duplicates removed; HWE 10-6; Sample call rate < 95%; gender discrepancies removed	1000 Genome Phase 3 v 5 Mixed	Michigan Imputation server	Phasing: ShapeIT v2.r790; Population: MIXED; Mode: Quality control and Imputation	EPACTS	age (Analysis I)	NA
SCORM	Singapore Cohort Study of the Risk Factors for Myopia	East Asian (Singapore)	EAS	males	12.4	8.7	0.67	7	20	7,8,9,10,11,12,13,14,15,16,17	Range = 1-7, Mean = 5.066, Median = 5	Illumina HumanHap550v3_A	Duplicates removed; HWE 10-6; Sample call rate < 95%; gender discrepancies removed	1000 Genome Phase 3 v 5 Mixed	Michigan Imputation server	Phasing: ShapeIT v2.r790; Population: MIXED; Mode: Quality control and Imputation	EPACTS	age (Analysis I)	NA
Southwest American Indians	Southwest American Indians who participated in a longitudinal study of type 2 diabetes	SW American Indian; predominantly Pima Indian	AMR	females	10.7	7.6	0.85	5	20	Varies	Range=4-9, Mean=5.21, Median=5	Axiom custom array (Afyfmetrix)	call rate ≥90%, discrepant rate ≤2 pairs among 100 blind duplicate pairs, and lack of deviation from Hardy-Weinberg equilibrium with a p>10−4	294 Pima WGS panel in GRCh37		Phasing: ShapeIT v2.r790; Population: Pima Indian; Mode: Quality control and Imputation	SOLAR mga	Age, BirthYr, PC1-5 (Analysis 1,2,3) BirthYr, PC1-5 (Analysis 4-6)
Southwest American Indians	Southwest American Indians who participated in a longitudinal study of type 2 diabetes	SW American Indian; predominantly Pima Indian	AMR	males	12.7	8.2	0.79	5	20	Varies	Range=4-8, Mean=5.07, Median=5	Axiom custom array (Afyfmetrix)	call rate ≥90%, discrepant rate ≤2 pairs among 100 blind duplicate pairs, and lack of deviation from Hardy-Weinberg equilibrium with a p>10−4	294 Pima WGS panel in GRCh37		Phasing: ShapeIT v2.r790; Population: Pima Indian; Mode: Quality control and Imputation	SOLAR mga	Age, BirthYr, PC1-5 (Analysis 1,2,3) BirthYr, PC1-5 (Analysis 4-6)
STRIP	Special Turku Coronary Risk Factor Intervention Project	Caucasian European (Finnish)	EUR	females	11.7	7.6	0.73	5	20	5-20, every half year	Range=1-31, Mean=17.72, Median=18	Metabochip	Duplicate samples, gender discrpancies, crytpic relatedness, excess heterozygosity, SNP call rate < 95%, SNP HWE < 10-6; monomorphic SNPs removed	HRC r1.1 2016	Michigan	Eagle v2.3 (autosomes) and ShapeIT v2.r790 (ChrX)	EPACTS	First 4 PCs, age (Analysis I)
STRIP	Special Turku Coronary Risk Factor Intervention Project	Caucasian European (Finnish)	EUR	males	13.6	9.7	0.71	5	20	5-20, every half year	Range=1-31, Mean=17.35, Median=18	Metabochip	Duplicate samples, gender discrpancies, crytpic relatedness, excess heterozygosity, SNP call rate < 95%, SNP HWE < 10-6; monomorphic SNPs removed	HRC r1.1 2016	Michigan	Eagle v2.3 (autosomes) and ShapeIT v2.r790 (ChrX)	EPACTS	First 4 PCs, age (Analysis I)
T1DGC	British Birth Cohort (B58C-T1DGC)	Caucasian European (British)	EUR	females	11.5	8.1	0.69	7	16	2016-07-11	only individuals with all 3 measurements were included	Illumina 550K Infinium	Sample call rate <95%, duplicate samples, gender discrpancies, crytpic relatedness, excess heterozygosity, SNP call rate < 95% for MAF>5% and <99% for MAF <5%, SNP HWE < 10-6; SNPs with MAF<1% removed	HRC r1.1 2016	Michigan	ShapeIT	rvtest	none	Analyses IV, V & VI only
T1DGC	British Birth Cohort (B58C-T1DGC)	Caucasian European (British)	EUR	males	12.5	9.5	0.62	7	16	2016-07-11	only individuals with all 3 measurements were included	Illumina 550K Infinium	Sample call rate <95%, duplicate samples, gender discrpancies, crytpic relatedness, excess heterozygosity, SNP call rate < 95% for MAF>5% and <99% for MAF <5%, SNP HWE < 10-6; SNPs with MAF<1% removed	HRC r1.1 2016	Michigan	ShapeIT	rvtest	none	Analyses IV, V & VI only
TDCOB	The Danish Childhood Obesity Biobank	Caucasian European (Danish)	EUR	females	NA	NA	NA	9.02	10.94	NA	1	Illumina Human CoreExome chip	Indv callrate > 95%, SNP call rate > 95%, remove duplicate samples, remove gender discrepancies, remove samples with excess heterozygosity, ethnicity verification with PCA, SNP HWE < 10-6	HRC r1.1 2016	Michigan	Eagle v2.3 (autosomes)		None
TDCOB	The Danish Childhood Obesity Biobank	Caucasian European (Danish)	EUR	males	NA	NA	NA	11.02	12.97	NA	1	Illumina Human CoreExome chip	Indv callrate > 95%, SNP call rate > 95%, remove duplicate samples, remove gender discrepancies, remove samples with excess heterozygosity, ethnicity verification with PCA, SNP HWE < 10-6	HRC r1.1 2016	Michigan	Eagle v2.3 (autosomes)		None
YFS	The Cardiovascular Risk in Young Finns Study	Caucasian European (Finnish)	EUR	females	11	7.3	0.55	5	18	6, 9, 12, 15, 18	Range=1-5, Mean= 3.03, Median=3	Illumina 670K custom chip	Duplicate samples, gender discrpancies, crytpic relatedness, excess heterozygosity, SNP call rate < 95%, SNP HWE < 10-6; monomorphic SNPs removed	HRC r1.1 2016	Michigan	Eagle v2.3 (autosomes) and ShapeIT v2.r790 (ChrX)	EPACTS	First 4 PCs, age (Analysis I)
YFS	The Cardiovascular Risk in Young Finns Study	Caucasian European (Finnish)	EUR	males	13.4	9	0.69	5	18	6, 9, 12, 15, 18	Range=1-5, Mean= 3.12, Median=3	Illumina 670K custom chip	Duplicate samples, gender discrpancies, crytpic relatedness, excess heterozygosity, SNP call rate < 95%, SNP HWE < 10-6; monomorphic SNPs removed	HRC r1.1 2016	Michigan	Eagle v2.3 (autosomes) and ShapeIT v2.r790 (ChrX)	EPACTS	First 4 PCs, age (Analysis I)
Project Viva	Project Viva	Caucasian American	EUR	males	13.2	9.4	0.7	2.5	18.3	Varies	range=3-34, mean=13, median=15	Illumina Infinium Core Exome-24	low quality samples (from lab qc), sample call rate <95%, snp callrate <98%, sex mismatch, monomorphic snps, maf < 1%, HWE p <1e-8	1000 Genomes	Michigan	ShapeIT	PLINK v2.00	1. First 3 PCs, age (Analysis I) 2. First 3 PCs (Analysis IV, V, VI)
Project Viva	Project Viva	Caucasian American	EUR	females	11.3	7.8	0.83	2.5	18.3	Varies	range=3-34, mean=13, median=15	Illumina Infinium Core Exome-25	low quality samples (from lab qc), sample call rate <95%, snp callrate <98%, sex mismatch, monomorphic snps, maf < 1%, HWE p <1e-8	1001 Genomes	Michigan	ShapeIT	PLINK v2.00	1. First 3 PCs, age (Analysis I) 2. First 3 PCs (Analysis IV, V, VI)
Project Viva	Project Viva	African American	AFR	males	12.9	9.5	0.84	2.5	18.3	Varies	range=3-28, mean=15, median=17	Illumina Infinium Core Exome-26	low quality samples (from lab qc), sample call rate <95%, snp callrate <98%, sex mismatch, monomorphic snps, maf < 1%, HWE p <1e-8	1002 Genomes	Michigan	ShapeIT	PLINK v2.00	1. First 3 PCs, age (Analysis I) 2. First 3 PCs (Analysis IV, V, VI)
Project Viva	Project Viva	African American	AFR	females	10.7	8.4	0.74	2.5	18.3	Varies	range=3-20, mean=12, median=15	Illumina Infinium Core Exome-27	low quality samples (from lab qc), sample call rate <95%, snp callrate <98%, sex mismatch, monomorphic snps, maf < 1%, HWE p <1e-8	1003 Genomes	Michigan	ShapeIT	PLINK v2.00	1. First 3 PCs, age (Analysis I) 2. First 3 PCs (Analysis IV, V, VI)

## Sheet: S2 Main_TE_results_by_ancestry
S2. GWAS results by ancestry.
													Transethnic: GWAMA				MR_Mega		AFR				AMR				EAS				EUR
Signal	Phenotype	Sex	SNP	MarkerName	Chromosome	Position	Nearest gene	EA	NEA	EAF	Nsample	Ncohort	beta	SE	P		P_MR_Mega	P_ancestry_het	EAF	beta	SE	P	EAF	beta	SE	P	EAF	beta	SE	P	EAF	beta	SE	P	#SNPs_95_cred_set
1	I	M+F	rs67807996	rs67807996	1	149995265	OTUD7B	A	G	0.312584	35014	39	0.066713	0.009355	1.04E-12	34534	5.98166e-11	0.143607	0.137741	0.000852	0.053219	0.987237	0.187195	0.040019	0.027257	0.151192	0.273649	0.143756	0.073932	0.051859	0.35986	0.071437	0.010236	4.18e-11	1
2	I	M+F	rs823094	1:205689807	1	205689807	NUCKS1	G	T	0.392957	37407	39	-0.038336	0.007881	1.17E-06	36927	2.30232e-08	0.000213003	0.252592	0.00742	0.032717	0.820758	0.259975	0.071779	0.035151	0.045931	NA	NA	NA	NA	0.422266	-0.047521	0.008346	7.34e-08	20
3	I	M+F	rs3791679	2:56096892	2	56096892	EFEMP1	G	A	0.239465	39411	40	-0.068477	0.0088	7.52E-15	38931	1.02354e-12	0.307503	0.087227	-0.050509	0.05384	0.348686	0.247496	-0.065768	0.027353	0.01877	0.74155	-0.148172	0.037656	8.4e-05	0.234423	-0.06407	0.009747	5.16e-10	3
4	I	M+F	rs6763927	3:141140366	3	141140366	RASA2	T	A	0.457355	42928	45	0.049268	0.007097	4.01E-12	42448	4.9625e-10	0.339386	0.683832	0.031588	0.031263	0.312801	0.440916	0.01688	0.019555	0.398769	0.224561	0.05779	0.032855	0.078599	0.451021	0.055474	0.008087	8.87e-11	16
5	I	M+F	rs7623981	3:172135334	3	172135334	GHSR	C	T	0.379397	40986	44	-0.050134	0.007604	4.46E-11	40506	2.66849e-09	0.217223	0.162022	-0.139521	0.040182	0.000527	0.314659	-0.060333	0.033834	0.081305	0.187912	-0.079737	0.034837	0.022111	0.426073	-0.044214	0.008171	3.12e-07	6
6	I	M+F	rs6817306	4:17868058	4	17868058	NCAPG	C	T	0.148117	39856	41	-0.072296	0.010765	1.93E-11	39376	1.91247e-10	0.037864	0.288173	-0.017113	0.03055	0.575802	0.092291	-0.155556	0.039921	0.000141	0.161015	-0.078111	0.045134	0.083516	0.131943	-0.072922	0.012461	3.16e-08	6
7	IV	M+F	rs1443537	4:82150880	4	82150880	PRKG2	A	C	0.334143	39039	34	0.073195	0.009493	1.31E-14	39039	4.1657e-12	0.59041	0.725886	0.069547	0.019574	0.000425	0.316566	0.083289	0.03734	0.028362	0.167812	0.144755	0.060236	0.016633	0.253428	0.070868	0.011552	3.1e-09	27
8	I	M+F	rs2131354	4:145599908	4	145599908	HHIP	A	G	0.474293	40541	43	0.043703	0.007456	4.72E-09	40061	2.74879e-08	0.0475814	0.179055	0.072618	0.03778	0.054859	0.511521	-0.015539	0.029767	0.60986	0.210849	0.039592	0.032841	0.227955	0.526042	0.047013	0.008103	4.13e-08	40
9	I	M+F	rs409012	5:77375625	5	77375625	TBCA	C	A	0.220145	41317	43	-0.052566	0.008705	1.60E-09	40837	3.97968e-08	0.116376	0.078323	-0.137416	0.05967	0.021443	0.336044	-0.01992	0.020848	0.350267	NA	NA	NA	NA	0.224454	-0.057397	0.009706	2.26e-08	75
10	IV	M+F	rs2814994	6:34620153	6	34620153	ILRUN	A	T	0.16883	39719	35	0.069558	0.011529	1.65E-09	39719	2.78548e-08	0.108483	0.195091	0.079686	0.021222	0.000196	0.12539	-0.010189	0.092029	0.913314	NA	NA	NA	NA	0.163986	0.067037	0.013888	3.11e-06	34
11	V	M+F	rs7766336	6:105388405	6	105388405	LIN28B	G	T	0.684232	40667	36	-0.005707	0.00186	0.002158	40667	6.50414e-10	1.00609e-08	0.693075	-0.081374	0.017936	5.84e-06	0.746492	-0.012787	0.032199	0.693469	NA	NA	NA	NA	0.67819	-0.004858	0.001873	0.009513	10
11	VI	M+F	rs314263	6:105392745	6	105392745	LIN28B	T	C	0.687874	39893	36	0.006974	0.001407	7.25E-07	39893	1.93147e-09	4.41472e-05	0.694034	0.048309	0.018173	0.008446	0.862679	0.058143	0.053732	0.280626	0.657345	0.169062	0.047972	0.000446	0.677387	0.006549	0.001412	6.63e-06	38
11	III	M+F	rs2181193	6:105442327	6	105442327	LIN28B	A	T	0.673917	19472	26	-0.07909	0.011031	7.81E-13	19472	9.59218e-11	4.53661e-11	0.688783	-0.078567	0.017947	1.33e-05	0.700015	-0.031543	0.149685	0.836589	0.614002	-0.104495	0.042713	0.014512	0.668791	-0.076838	0.014872	9.99e-07	17
12	I	M+F	rs1361107	6:126767511	6	126767511	CENPW	C	A	0.461994	40003	42	0.059801	0.007575	3.05E-15	39523	1.64434e-13	0.0873454	0.24028	-0.002683	0.033801	0.936773	0.667691	0.043377	0.0343	0.216332	0.884392	0.021204	0.053256	0.690535	0.458405	0.06516	0.008071	2.31e-14	123
13	I	M+F	rs9496369	6:142724918	6	142724918	ADGRG6	T	C	0.330181	42928	45	-0.051549	0.007709	2.36E-11	42448	1.99665e-09	0.211125	0.670382	-0.109943	0.031464	0.000485	0.256859	-0.023347	0.022705	0.314781	0.48702	-0.027611	0.027356	0.312816	0.288694	-0.053759	0.00893	1.26e-08	33
13	IV	M+F	rs7770386	6:142775657	6	142775657	ADGRG6	T	C	0.349025	39833	35	-0.05203	0.009123	1.20E-08	39833	2.51401e-09	0.00165326	0.612431	-0.075482	0.018002	3.21e-05	0.351011	0.072586	0.066607	0.284059	0.400114	0.102082	0.046795	0.029707	0.291258	-0.055195	0.011011	1.28e-06	14
14	I	M+F	rs10103623	8:78106082	8	78106082	PEX2	G	A	0.244243	42295	45	0.071943	0.008248	2.87E-18	41815	2.30198e-15	0.699423	0.095157	0.107621	0.050289	0.032555	0.280106	0.07761	0.021785	0.0005	0.181312	0.047561	0.035504	0.180364	0.266386	0.071355	0.009364	5.87e-13	36
15	V	M+F	rs16911905	11:5249290	11	5249290	HBB	C	G	0.0991835	26380	21	0.075734	0.016824	6.84E-06	26380	1.31647e-09	4.02975e-06	0.197089	-0.146657	0.022028	2.93e-11	0.083015	-0.15301	0.132563	0.251913	NA	NA	NA	NA	0.05964	-0.01834	0.026581	0.490236	1
16	I	M+F	rs2724648	12:11858191	12	11858191	ETV6	T	C	0.613894	43373	46	-0.049051	0.007272	1.58E-11	42893	6.62009e-09	0.941335	0.405129	-0.05517	0.029961	0.06586	0.721969	-0.034876	0.021982	0.12089	0.479463	-0.048561	0.026994	0.072031	0.636147	-0.050667	0.008346	9.52e-09	12
17	VI	M+F	rs2364232	12:93994827	12	93994827	SOCS2	C	A	0.252762	42873	40	0.008406	0.001182	1.20E-12	42873	1.64624e-11	0.0754339	0.206926	0.084619	0.021276	8.18e-05	0.242462	0.008042	0.002671	0.002692	0.21185	0.057959	0.055851	0.300897	0.266155	0.008173	0.001321	1.85e-09	5
18	IV	M+F	rs28406193	12:123891865	12	123891865	KMT5A	G	T	0.73529	41736	38	-0.060631	0.009841	7.43E-10	41736	1.1388e-08	0.0900602	0.539458	-0.096008	0.017707	7.59e-08	0.69175	-0.027453	0.037248	0.468792	NA	NA	NA	NA	0.78688	-0.046773	0.012484	0.000294	9
18	I	M+F	rs28481863	12:123902361	12	123902361	RILPL2	A	G	0.772694	41317	43	-0.054448	0.008979	1.37E-09	40837	4.30992e-08	0.15793	0.653017	-0.033048	0.031524	0.294975	0.670149	-0.031993	0.02157	0.147068	NA	NA	NA	NA	0.803088	-0.061996	0.010399	1.74e-08	155
19	I	M+F	rs11634560	15:67467830	15	67467830	IQCH	G	T	0.24867	38930	41	0.057555	0.008836	7.58E-11	38450	1.97985e-08	0.944861	0.119938	0.057457	0.048363	0.235299	0.151877	0.034829	0.044398	0.443162	NA	NA	NA	NA	0.272677	0.058529	0.009177	1.65e-09	9
20	I	M+F	rs10520573	15:84591575	15	84591575	ADAMTSL3	G	A	0.570168	41431	45	0.049007	0.007425	4.24E-11	40951	4.92279e-09	0.469186	0.759293	0.005214	0.034213	0.878991	0.733577	0.036362	0.035714	0.319586	0.639221	0.069775	0.028033	0.012828	0.528701	0.050379	0.008103	4.16e-09	69
21	I	M+F	rs71385734	16:2160503	16	2160503	PKD1	G	T	0.201947	37390	38	-0.058361	0.010058	6.72E-09	36910	8.595e-09	0.00879504	0.492275	-0.022512	0.029865	0.451477	0.134725	-0.104852	0.045613	0.02465	NA	NA	NA	NA	0.172173	-0.060516	0.010988	1.92e-07	8
22	IV	M+F	rs7238093	18:20728158	18	20728158	CABLES1	T	A	0.795595	42740	40	0.080678	0.010635	3.45E-14	42740	9.06993e-12	0.513735	0.8893	0.065469	0.027728	0.019151	0.616976	0.102204	0.035261	0.004397	0.824595	0.080729	0.058941	0.172192	0.789757	0.081059	0.012453	3.22e-10	13
22	I	M+F	rs7244464	18:20729714	18	20729714	CABLES1	C	A	0.774004	42601	46	0.075196	0.008589	2.16E-18	42121	3.70017e-15	0.866745	0.744272	0.068852	0.031766	0.030393	0.588941	0.077191	0.024293	0.001903	0.87652	0.065196	0.041606	0.117111	0.788166	0.07604	0.009857	3.04e-13	12
23	I	M+F	rs143384	20:34025756	20	34025756	GDF5	G	A	0.454458	41711	44	0.059641	0.007512	2.14E-15	41231	1.12412e-13	0.0733948	0.879676	0.09423	0.046288	0.042013	0.318715	0.081629	0.02651	0.002621	0.389497	-0.006385	0.028723	0.824072	0.423591	0.061871	0.008271	1.53e-12	1
23	IV	M+F	rs143384	20:34025756	20	34025756	GDF5	G	A	0.488214	41850	38	0.063398	0.009202	5.81E-12	41850	4.05915e-10	0.239614	0.880834	0.025701	0.027444	0.352717	0.336168	0.083446	0.037657	0.029414	0.320465	-0.011438	0.05343	0.831034	0.425157	0.069989	0.0103	5.25e-11	67
24	I	M+F	rs1326022	20:54844025	20	54844025	MC3R	G	A	0.690368	37469	39	-0.052831	0.008471	4.61E-10	36989	4.25426e-09	0.0482684	0.55546	-0.067439	0.028284	0.017247	0.833973	-0.343785	0.075659	9.04e-06	0.902832	0.02353	0.05609	0.674866	0.697469	-0.049156	0.009056	2.87e-07	19

## Sheet: S3 LDSC_heritability
S3. SNP-based heritability estimates by LDSC.
	Females and males combined- EUR only			Females			Males			TE sex combined			Cohorts with SD of b-timing >0.7
Phenotype	h2	SE	Lambda	h2	SE	Lambda	h2	SE	Lambda				h2	SE	Lambda
I (10F/12M)	0.3169	0.0244	1.0496	0.3844	0.0383	1.0285	0.294	0.0433	1.0285	0.1776	0.0166	1.0405
II (8-adult)	0.2196	0.0298	1.0075	0.2681	0.0535	1.0075	0.2205	0.0572	1.0075	0.2294	0.032	1.0957
III (14-adult)	0.2109	0.0417	0.9288	0.1483	0.0795	0.9576	0.3834	0.0918	0.978	0.0715	0.0223	1.0618
IV (a-size)	0.1478	0.0202	1.0285	0.1551	0.035	1.0285	0.157	0.031	1.0195	0.1287	0.0158	1.1333
V (b-timing)	0.0058	0.0157	1.0075	0.0103	0.0288	1.0105	0.025	0.0261	1.0016	0.0091	0.0116	1.0135	0.0026	0.0182	1.0046
VI (c-tempo)	0.1296	0.0178	1.0195	0.1529	0.0296	1.0165	0.1754	0.0323	1.0016	0.1127	0.0149	1.1019

## Sheet: S4. Phenoscanner SNPs
S4. SNPs queried in Phenoscanner.
snp	rsid	hg19_coordinates	hg38_coordinates	chr	pos_hg19	pos_hg38	a1	a2	afr	amr	eas	eur	sas	consequence	protein_position	amino_acids	ensembl	hgnc
rs67807996	rs67807996	chr1:149995265	chr1:150023307	1	149995265	150023307	A	G	0.0129	0.255	0.2133	0.3588	0.2924	intergenic	-	-	-	OTUD7B
rs823094	rs823094	chr1:205689807	chr1:205720679	1	205689807	205720679	G	T	0.1959	0.2594	0.004	0.4095	0.1237	intron	-	-	ENSG00000069275	NUCKS1
rs3791679	rs3791679	chr2:56096892	chr2:55869757	2	56096892	55869757	G	A	0.0333	0.2421	0.7688	0.2286	0.2505	intron	-	-	ENSG00000115380	EFEMP1
rs1346789	rs1346789	chr2:56092052	chr2:55864917	2	56092052	55864917	T	C	0.9576	0.7622	0.2133	0.7952	0.7331	downstream	-	-	ENSG00000115380	EFEMP1
rs6763927	rs6763927	chr3:141140366	chr3:141421524	3	141140366	141421524	A	T	0.2617	0.5821	0.6687	0.5775	0.7209	intron	-	-	ENSG00000177311	ZBTB38
rs7623981	rs7623981	chr3:172135334	chr3:172417544	3	172135334	172417544	C	T	0.1029	0.2968	0.1895	0.4612	0.1789	intergenic	-	-	-	U8
rs6817306	rs6817306	chr4:17868058	chr4:17866435	4	17868058	17866435	C	T	0.323	0.1455	0.1637	0.1074	0.2914	intron	-	-	ENSG00000178177	LCORL
rs1443537	rs1443537	chr4:82150880	chr4:81229726	4	82150880	81229726	C	A	0.1899	0.7075	0.8244	0.7455	0.7832	intergenic	-	-	-	RP11-576N17.4
rs1712374	rs1712374	chr4:82154710	chr4:81233556	4	82154710	81233556	T	C	0.2859	0.7032	0.8224	0.6839	0.7791	intergenic	-	-	-	RP11-576N17.4
rs2131354	rs2131354	chr4:145599908	chr4:144678756	4	145599908	144678756	G	A	0.8828	0.5346	0.7966	0.508	0.4847	intron	-	-	ENSG00000164161	HHIP
rs6537315	rs6537315	chr4:145724712	chr4:144803560	4	145724712	144803560	A	G	0.1725	0.3026	0.2996	0.4235	0.2628	intergenic	-	-	-	FHDC1
rs409012	rs409012	chr5:77375625	chr5:78079801	5	77375625	78079801	A	C	0.9887	0.6974	0.9315	0.7873	0.8855	intron	-	-	ENSG00000132842	AP3B1
rs2814994	rs2814994	chr6:34620153	chr6:34652376	6	34620153	34652376	A	T	0.1989	0.0951	0.0129	0.1223	0.0828	intron	-	-	ENSG00000196821	C6orf106
rs7766336	rs7766336	chr6:105388405	chr6:104940530	6	105388405	104940530	G	T	-	-	-	-	-	intron	-	-	ENSG00000187772	LIN28B
rs314263	rs314263	chr6:105392745	chr6:104944870	6	105392745	104944870	C	T	0.3381	0.2637	0.3056	0.3429	0.2802	intron	-	-	ENSG00000187772	LIN28B
rs2181193	rs2181193	chr6:105442327	chr6:104994452	6	105442327	104994452	A	T	0.674	0.7003	0.6905	0.6471	0.7188	intron	-	-	ENSG00000187772	LIN28B
rs1361107	rs1361107	chr6:126767511	chr6:126446365	6	126767511	126446365	A	C	0.739	0.3199	0.0268	0.5417	0.3466	-	-	-	-	MIR588
rs1159619	rs1159619	chr6:126801144	chr6:126479998	6	126801144	126479998	A	C	0.1725	0.6686	0.9732	0.4543	0.6452	upstream	-	-	ENSG00000207632	MIR588
rs9496369	rs9496369	chr6:142724918	chr6:142403781	6	142724918	142403781	C	T	0.2443	0.6297	0.5942	0.6819	0.6902	intron	-	-	-	ADGRG6
rs7770386	rs7770386	chr6:142775657	chr6:142454520	6	142775657	142454520	C	T	0.3268	0.6254	0.6081	0.6769	0.6881	intergenic	-	-	-	AL356739.1
rs10103623	rs10103623	chr8:78106082	chr8:77193846	8	78106082	77193846	A	G	0.9425	0.7608	0.8075	0.7087	0.6973	intergenic	-	-	-	AC105242.1
rs2167733	rs2167733	chr8:78110734	chr8:77198498	8	78110734	77198498	G	A	0.9425	0.7608	0.8075	0.7087	0.6973	intergenic	-	-	-	AC105242.1
rs72829034	rs72829034	chr10:64129318	chr10:62369559	10	64129318	62369559	A	C	0.0439	0.0331	0.0873	0.0557	0.1074	upstream	-	-	ENSG00000138311	ZNF365
rs16911905	rs16911905	chr11:5249290	chr11:5228060	11	5249290	5228060	C	G	0.2572	0.0461	0.0248	0.0517	0.0859	intron	-	-	ENSG00000244734	HBB
rs2724648	rs2724648	chr12:11858191	chr12:11705257	12	11858191	11705257	T	C	0.3464	0.7075	0.5506	0.6421	0.5675	intron	-	-	ENSG00000139083	ETV6
rs2364232	rs2364232	chr12:93994827	chr12:93601051	12	93994827	93601051	A	C	0.8026	0.7277	0.8165	0.7545	0.8262	intergenic	-	-	-	SOCS2
rs28406193	rs28406193	chr12:123891865	chr12:123407318	12	123891865	123407318	G	T	0.4887	0.781	0.998	0.7734	0.8006	intron	-	-	-	KMT5A
rs28481863	rs28481863	chr12:123902361	chr12:123417814	12	123902361	123417814	A	G	0.6331	0.7968	0.998	0.7932	0.8006	intron	-	-	ENSG00000150977	RILPL2
rs36103703	rs36103703	chr14:56284991	chr14:55818273	14	56284991	55818273	A	G	0.9955	0.9236	0.9643	0.8489	0.9591	intergenic	-	-	-	LINC00520
rs11634560	rs11634560	chr15:67467830	chr15:67175492	15	67467830	67175492	G	T	0.0545	0.1383	0.001	0.2932	0.1258	intron	-	-	ENSG00000166949	SMAD3
rs10520573	rs10520573	chr15:84591575	chr15:83922823	15	84591575	83922823	G	A	0.8306	0.7248	0.7292	0.5358	0.5951	intron	-	-	ENSG00000156218	ADAMTSL3
rs71385734	rs71385734	chr16:2160503	chr16:2110502	16	2160503	2110502	G	T	0.556	0.1787	0	0.167	0.0849	synonymous	1555	A	ENSG00000008710	PKD1
rs7238093	rs7238093	chr18:20728158	chr18:23148194	18	20728158	23148194	A	T	0.0613	0.366	0.1389	0.2117	0.1616	intron	-	-	ENSG00000134508	CABLES1
rs8094261	rs8094261	chr18:20746728	chr18:23166764	18	20746728	23166764	C	G	0.7753	0.634	0.8562	0.8052	0.8333	intron	-	-	ENSG00000134508	CABLES1
rs7244464	rs7244464	chr18:20729714	chr18:23149750	18	20729714	23149750	A	C	0.2511	0.3804	0.1657	0.2187	0.1902	intron	-	-	ENSG00000134508	CABLES1
rs143384	rs143384	chr20:34025756	chr20:35437976	20	34025756	35437976	G	A	0.9728	0.3429	0.2887	0.4115	0.5941	5_prime_UTR	-	-	ENSG00000125965	GDF5
rs1326022	rs1326022	chr20:54844025	chr20:56268969	20	54844025	56268969	G	A	0.4917	0.7954	0.8681	0.666	0.7607	non_coding_transcript_exon	-	-	-	RP11-380D15.2

## Sheet: S5 Phenoscanner assocs
S5. Phenoscanner results.
snp	rsid	hg19_coordinates	hg38_coordinates	a1	a2	trait	efo	study	pmid	ancestry	year	beta	se	p	direction	n	n_cases	n_controls	n_studies	unit
rs7766336	rs7766336	chr6:105388405	chr6:104940530	G	T	Age at menarche	EFO_0004703	Neale B	UKBB	European	2017	-0.05985	0.00265	7.863e-113	-	176008	0	176008	1	-
rs314263	rs314263	chr6:105392745	chr6:104944870	C	T	Age at menarche	EFO_0004703	Perry JR	19448620	European	2009	NA	NA	9.79e-09	NA	17510	-	-	-	-
rs314263	rs314263	chr6:105392745	chr6:104944870	C	T	Age at menarche	EFO_0004703	He C	19448621	European	2009	NA	NA	4.7e-15	NA	17438	-	-	-	-
rs314263	rs314263	chr6:105392745	chr6:104944870	C	T	Age at menarche	EFO_0004703	Neale B	UKBB	European	2017	0.05982	0.00265	1.045e-112	+	176008	0	176008	1	-
rs314263	rs314263	chr6:105392745	chr6:104944870	C	T	Age at menarche	EFO_0004703;EFO_0007701;EFO_0007702	ReproGen	25231870	European	2014	0.12	NA	0	+	182416	0	182416	58	years
rs2181193	rs2181193	chr6:105442327	chr6:104994452	A	T	Age at menarche	EFO_0004703	Neale B	UKBB	European	2017	-0.05674	0.002623	1.191e-103	-	176008	0	176008	1	-
rs1361107	rs1361107	chr6:126767511	chr6:126446365	A	C	Age at menarche	EFO_0004703	Neale B	UKBB	European	2017	0.02053	0.002487	1.52e-16	+	176008	0	176008	1	-
rs1361107	rs1361107	chr6:126767511	chr6:126446365	A	C	Age at menarche	EFO_0004703;EFO_0007701;EFO_0007702	ReproGen	25231870	European	2014	0.035	0.004867	6.4e-13	+	182416	0	182416	58	years
rs1159619	rs1159619	chr6:126801144	chr6:126479998	A	C	Age at menarche	EFO_0004703	Neale B	UKBB	European	2017	-0.02043	0.00249	2.36e-16	-	176008	0	176008	1	-
rs1159619	rs1159619	chr6:126801144	chr6:126479998	A	C	Age at menarche	EFO_0004703;EFO_0007701;EFO_0007702	ReproGen	25231870	European	2014	-0.035	0.004849	5.3e-13	-	182416	0	182416	58	years
rs10103623	rs10103623	chr8:78106082	chr8:77193846	A	G	Age at menarche	EFO_0004703	Neale B	UKBB	European	2017	0.01804	0.002738	4.476e-11	+	176008	0	176008	1	-
rs2167733	rs2167733	chr8:78110734	chr8:77198498	G	A	Age at menarche	EFO_0004703	Neale B	UKBB	European	2017	0.01814	0.002743	3.776e-11	+	176008	0	176008	1	-
rs2167733	rs2167733	chr8:78110734	chr8:77198498	G	A	Age at menarche	EFO_0004703;EFO_0007701;EFO_0007702	ReproGen	25231870	European	2014	0.044	0.005532	1.8e-15	+	182416	0	182416	58	years
rs28406193	rs28406193	chr12:123891865	chr12:123407318	G	T	Age completed full time education	EFO_0004784	Neale B	UKBB	European	2017	-0.01765	0.003022	5.26e-09	-	226899	0	226899	1	-
rs28481863	rs28481863	chr12:123902361	chr12:123417814	A	G	Age completed full time education	EFO_0004784	Neale B	UKBB	European	2017	-0.01877	0.003091	1.269e-09	-	226899	0	226899	1	-
rs6763927	rs6763927	chr3:141140366	chr3:141421524	A	T	Allergic disease	EFO_0003785	Ferreira M	29083406	European	2017	-0.0328	0.0058	1.24e-08	-	360838	180129	180709	13	log OR
rs67807996	rs67807996	chr1:149995265	chr1:150023307	A	G	Arm fat mass left	-	Neale B	UKBB	European	2017	0.01747	0.002508	3.295e-12	+	331164	0	331164	1	IVNT
rs71385734	rs71385734	chr16:2160503	chr16:2110502	G	T	Arm fat mass left	-	Neale B	UKBB	European	2017	-0.01999	0.003192	3.761e-10	-	331164	0	331164	1	IVNT
rs6763927	rs6763927	chr3:141140366	chr3:141421524	A	T	Arm fat mass left	-	Neale B	UKBB	European	2017	-0.01775	0.002404	1.551e-13	-	331164	0	331164	1	IVNT
rs409012	rs409012	chr5:77375625	chr5:78079801	A	C	Arm fat mass left	-	Neale B	UKBB	European	2017	0.01862	0.002763	1.612e-11	+	331164	0	331164	1	IVNT
rs2814994	rs2814994	chr6:34620153	chr6:34652376	A	T	Arm fat mass left	-	Neale B	UKBB	European	2017	0.04457	0.003435	1.786e-38	+	331164	0	331164	1	IVNT
rs67807996	rs67807996	chr1:149995265	chr1:150023307	A	G	Arm fat mass right	-	Neale B	UKBB	European	2017	0.0175	0.002507	2.931e-12	+	331226	0	331226	1	IVNT
rs71385734	rs71385734	chr16:2160503	chr16:2110502	G	T	Arm fat mass right	-	Neale B	UKBB	European	2017	-0.01952	0.003191	9.616e-10	-	331226	0	331226	1	IVNT
rs6763927	rs6763927	chr3:141140366	chr3:141421524	A	T	Arm fat mass right	-	Neale B	UKBB	European	2017	-0.01788	0.002404	1.008e-13	-	331226	0	331226	1	IVNT
rs409012	rs409012	chr5:77375625	chr5:78079801	A	C	Arm fat mass right	-	Neale B	UKBB	European	2017	0.0187	0.002762	1.281e-11	+	331226	0	331226	1	IVNT
rs2814994	rs2814994	chr6:34620153	chr6:34652376	A	T	Arm fat mass right	-	Neale B	UKBB	European	2017	0.04303	0.003435	5.366e-36	+	331226	0	331226	1	IVNT
rs67807996	rs67807996	chr1:149995265	chr1:150023307	A	G	Arm fat percentage left	-	Neale B	UKBB	European	2017	0.01482	0.001937	1.966e-14	+	331198	0	331198	1	IVNT
rs1361107	rs1361107	chr6:126767511	chr6:126446365	A	C	Arm fat percentage left	-	Neale B	UKBB	European	2017	0.01256	0.001845	1.01e-11	+	331198	0	331198	1	IVNT
rs1159619	rs1159619	chr6:126801144	chr6:126479998	A	C	Arm fat percentage left	-	Neale B	UKBB	European	2017	-0.01238	0.001847	2.041e-11	-	331198	0	331198	1	IVNT
rs2814994	rs2814994	chr6:34620153	chr6:34652376	A	T	Arm fat percentage left	-	Neale B	UKBB	European	2017	0.02384	0.002654	2.625e-19	+	331198	0	331198	1	IVNT
rs67807996	rs67807996	chr1:149995265	chr1:150023307	A	G	Arm fat percentage right	-	Neale B	UKBB	European	2017	0.01484	0.001946	2.419e-14	+	331249	0	331249	1	IVNT
rs1361107	rs1361107	chr6:126767511	chr6:126446365	A	C	Arm fat percentage right	-	Neale B	UKBB	European	2017	0.01226	0.001854	3.675e-11	+	331249	0	331249	1	IVNT
rs1159619	rs1159619	chr6:126801144	chr6:126479998	A	C	Arm fat percentage right	-	Neale B	UKBB	European	2017	-0.01211	0.001856	6.844e-11	-	331249	0	331249	1	IVNT
rs2814994	rs2814994	chr6:34620153	chr6:34652376	A	T	Arm fat percentage right	-	Neale B	UKBB	European	2017	0.02283	0.002666	1.114e-17	+	331249	0	331249	1	IVNT
rs823094	rs823094	chr1:205689807	chr1:205720679	G	T	Arm fat-free mass left	-	Neale B	UKBB	European	2017	-0.01103	0.001565	1.876e-12	-	331159	0	331159	1	IVNT
rs2724648	rs2724648	chr12:11858191	chr12:11705257	T	C	Arm fat-free mass left	-	Neale B	UKBB	European	2017	-0.01332	0.001611	1.321e-16	-	331159	0	331159	1	IVNT
rs28406193	rs28406193	chr12:123891865	chr12:123407318	G	T	Arm fat-free mass left	-	Neale B	UKBB	European	2017	-0.01212	0.001918	2.619e-10	-	331159	0	331159	1	IVNT
rs28481863	rs28481863	chr12:123902361	chr12:123417814	A	G	Arm fat-free mass left	-	Neale B	UKBB	European	2017	-0.01282	0.001961	6.235e-11	-	331159	0	331159	1	IVNT
rs2364232	rs2364232	chr12:93994827	chr12:93601051	A	C	Arm fat-free mass left	-	Neale B	UKBB	European	2017	-0.0222	0.001768	3.594e-36	-	331159	0	331159	1	IVNT
rs71385734	rs71385734	chr16:2160503	chr16:2110502	G	T	Arm fat-free mass left	-	Neale B	UKBB	European	2017	-0.02498	0.00207	1.576e-33	-	331159	0	331159	1	IVNT
rs7238093	rs7238093	chr18:20728158	chr18:23148194	A	T	Arm fat-free mass left	-	Neale B	UKBB	European	2017	-0.02607	0.001882	1.326e-43	-	331159	0	331159	1	IVNT
rs7244464	rs7244464	chr18:20729714	chr18:23149750	A	C	Arm fat-free mass left	-	Neale B	UKBB	European	2017	-0.02599	0.001873	9.147e-44	-	331159	0	331159	1	IVNT
rs8094261	rs8094261	chr18:20746728	chr18:23166764	C	G	Arm fat-free mass left	-	Neale B	UKBB	European	2017	0.02253	0.00195	6.997e-31	+	331159	0	331159	1	IVNT
rs1346789	rs1346789	chr2:56092052	chr2:55864917	T	C	Arm fat-free mass left	-	Neale B	UKBB	European	2017	0.01354	0.001914	1.468e-12	+	331159	0	331159	1	IVNT
rs3791679	rs3791679	chr2:56096892	chr2:55869757	G	A	Arm fat-free mass left	-	Neale B	UKBB	European	2017	-0.01402	0.001847	3.228e-14	-	331159	0	331159	1	IVNT
rs143384	rs143384	chr20:34025756	chr20:35437976	G	A	Arm fat-free mass left	-	Neale B	UKBB	European	2017	0.03269	0.001572	5.04e-96	+	331159	0	331159	1	IVNT
rs6763927	rs6763927	chr3:141140366	chr3:141421524	A	T	Arm fat-free mass left	-	Neale B	UKBB	European	2017	-0.0271	0.001559	1.128e-67	-	331159	0	331159	1	IVNT
rs7623981	rs7623981	chr3:172135334	chr3:172417544	C	T	Arm fat-free mass left	-	Neale B	UKBB	European	2017	-0.01369	0.001561	1.818e-18	-	331159	0	331159	1	IVNT
rs2131354	rs2131354	chr4:145599908	chr4:144678756	G	A	Arm fat-free mass left	-	Neale B	UKBB	European	2017	-0.01853	0.001548	5.199e-33	-	331159	0	331159	1	IVNT
rs6537315	rs6537315	chr4:145724712	chr4:144803560	A	G	Arm fat-free mass left	-	Neale B	UKBB	European	2017	-0.01893	0.001556	4.895e-34	-	331159	0	331159	1	IVNT
rs6817306	rs6817306	chr4:17868058	chr4:17866435	C	T	Arm fat-free mass left	-	Neale B	UKBB	European	2017	-0.02703	0.002204	1.417e-34	-	331159	0	331159	1	IVNT
rs1443537	rs1443537	chr4:82150880	chr4:81229726	C	A	Arm fat-free mass left	-	Neale B	UKBB	European	2017	-0.01162	0.001775	5.761e-11	-	331159	0	331159	1	IVNT
rs1712374	rs1712374	chr4:82154710	chr4:81233556	T	C	Arm fat-free mass left	-	Neale B	UKBB	European	2017	-0.01189	0.001676	1.321e-12	-	331159	0	331159	1	IVNT
rs409012	rs409012	chr5:77375625	chr5:78079801	A	C	Arm fat-free mass left	-	Neale B	UKBB	European	2017	0.01508	0.001792	3.903e-17	+	331159	0	331159	1	IVNT
rs1361107	rs1361107	chr6:126767511	chr6:126446365	A	C	Arm fat-free mass left	-	Neale B	UKBB	European	2017	-0.01908	0.001549	7.613e-35	-	331159	0	331159	1	IVNT
rs1159619	rs1159619	chr6:126801144	chr6:126479998	A	C	Arm fat-free mass left	-	Neale B	UKBB	European	2017	0.01917	0.001551	4.65e-35	+	331159	0	331159	1	IVNT
rs9496369	rs9496369	chr6:142724918	chr6:142403781	C	T	Arm fat-free mass left	-	Neale B	UKBB	European	2017	0.01611	0.001714	5.52e-21	+	331159	0	331159	1	IVNT
rs7770386	rs7770386	chr6:142775657	chr6:142454520	C	T	Arm fat-free mass left	-	Neale B	UKBB	European	2017	0.01577	0.001711	3.068e-20	+	331159	0	331159	1	IVNT
rs2814994	rs2814994	chr6:34620153	chr6:34652376	A	T	Arm fat-free mass left	-	Neale B	UKBB	European	2017	0.0369	0.002228	1.444e-61	+	331159	0	331159	1	IVNT
rs10103623	rs10103623	chr8:78106082	chr8:77193846	A	G	Arm fat-free mass left	-	Neale B	UKBB	European	2017	-0.01889	0.001709	2.192e-28	-	331159	0	331159	1	IVNT
rs2167733	rs2167733	chr8:78110734	chr8:77198498	G	A	Arm fat-free mass left	-	Neale B	UKBB	European	2017	-0.01884	0.001712	3.761e-28	-	331159	0	331159	1	IVNT
rs823094	rs823094	chr1:205689807	chr1:205720679	G	T	Arm fat-free mass right	-	Neale B	UKBB	European	2017	-0.01188	0.001534	9.751e-15	-	331221	0	331221	1	IVNT
rs2724648	rs2724648	chr12:11858191	chr12:11705257	T	C	Arm fat-free mass right	-	Neale B	UKBB	European	2017	-0.0141	0.001578	4.128e-19	-	331221	0	331221	1	IVNT
rs28406193	rs28406193	chr12:123891865	chr12:123407318	G	T	Arm fat-free mass right	-	Neale B	UKBB	European	2017	-0.01179	0.00188	3.558e-10	-	331221	0	331221	1	IVNT
rs28481863	rs28481863	chr12:123902361	chr12:123417814	A	G	Arm fat-free mass right	-	Neale B	UKBB	European	2017	-0.01228	0.001922	1.689e-10	-	331221	0	331221	1	IVNT
rs2364232	rs2364232	chr12:93994827	chr12:93601051	A	C	Arm fat-free mass right	-	Neale B	UKBB	European	2017	-0.02188	0.001732	1.449e-36	-	331221	0	331221	1	IVNT
rs71385734	rs71385734	chr16:2160503	chr16:2110502	G	T	Arm fat-free mass right	-	Neale B	UKBB	European	2017	-0.02401	0.002029	2.644e-32	-	331221	0	331221	1	IVNT
rs7238093	rs7238093	chr18:20728158	chr18:23148194	A	T	Arm fat-free mass right	-	Neale B	UKBB	European	2017	-0.02538	0.001845	4.571e-43	-	331221	0	331221	1	IVNT
rs7244464	rs7244464	chr18:20729714	chr18:23149750	A	C	Arm fat-free mass right	-	Neale B	UKBB	European	2017	-0.02529	0.001836	3.761e-43	-	331221	0	331221	1	IVNT
rs8094261	rs8094261	chr18:20746728	chr18:23166764	C	G	Arm fat-free mass right	-	Neale B	UKBB	European	2017	0.02207	0.001911	7.301e-31	+	331221	0	331221	1	IVNT
rs1346789	rs1346789	chr2:56092052	chr2:55864917	T	C	Arm fat-free mass right	-	Neale B	UKBB	European	2017	0.01317	0.001876	2.158e-12	+	331221	0	331221	1	IVNT
rs3791679	rs3791679	chr2:56096892	chr2:55869757	G	A	Arm fat-free mass right	-	Neale B	UKBB	European	2017	-0.01388	0.00181	1.731e-14	-	331221	0	331221	1	IVNT
rs143384	rs143384	chr20:34025756	chr20:35437976	G	A	Arm fat-free mass right	-	Neale B	UKBB	European	2017	0.03246	0.001541	1.738e-98	+	331221	0	331221	1	IVNT
rs6763927	rs6763927	chr3:141140366	chr3:141421524	A	T	Arm fat-free mass right	-	Neale B	UKBB	European	2017	-0.02625	0.001528	3.945e-66	-	331221	0	331221	1	IVNT
rs7623981	rs7623981	chr3:172135334	chr3:172417544	C	T	Arm fat-free mass right	-	Neale B	UKBB	European	2017	-0.01378	0.00153	2.099e-19	-	331221	0	331221	1	IVNT
rs2131354	rs2131354	chr4:145599908	chr4:144678756	G	A	Arm fat-free mass right	-	Neale B	UKBB	European	2017	-0.01797	0.001517	2.41e-32	-	331221	0	331221	1	IVNT
rs6537315	rs6537315	chr4:145724712	chr4:144803560	A	G	Arm fat-free mass right	-	Neale B	UKBB	European	2017	-0.01891	0.001525	2.695e-35	-	331221	0	331221	1	IVNT
rs6817306	rs6817306	chr4:17868058	chr4:17866435	C	T	Arm fat-free mass right	-	Neale B	UKBB	European	2017	-0.02855	0.00216	7.082e-40	-	331221	0	331221	1	IVNT
rs1443537	rs1443537	chr4:82150880	chr4:81229726	C	A	Arm fat-free mass right	-	Neale B	UKBB	European	2017	-0.01145	0.001739	4.529e-11	-	331221	0	331221	1	IVNT
rs1712374	rs1712374	chr4:82154710	chr4:81233556	T	C	Arm fat-free mass right	-	Neale B	UKBB	European	2017	-0.01188	0.001643	4.888e-13	-	331221	0	331221	1	IVNT
rs409012	rs409012	chr5:77375625	chr5:78079801	A	C	Arm fat-free mass right	-	Neale B	UKBB	European	2017	0.01562	0.001757	6.036e-19	+	331221	0	331221	1	IVNT
rs1361107	rs1361107	chr6:126767511	chr6:126446365	A	C	Arm fat-free mass right	-	Neale B	UKBB	European	2017	-0.0194	0.001518	2.338e-37	-	331221	0	331221	1	IVNT
rs1159619	rs1159619	chr6:126801144	chr6:126479998	A	C	Arm fat-free mass right	-	Neale B	UKBB	European	2017	0.01954	0.00152	8.43e-38	+	331221	0	331221	1	IVNT
rs9496369	rs9496369	chr6:142724918	chr6:142403781	C	T	Arm fat-free mass right	-	Neale B	UKBB	European	2017	0.01509	0.00168	2.684e-19	+	331221	0	331221	1	IVNT
rs7770386	rs7770386	chr6:142775657	chr6:142454520	C	T	Arm fat-free mass right	-	Neale B	UKBB	European	2017	0.01475	0.001677	1.445e-18	+	331221	0	331221	1	IVNT
rs2814994	rs2814994	chr6:34620153	chr6:34652376	A	T	Arm fat-free mass right	-	Neale B	UKBB	European	2017	0.03621	0.002184	1.035e-61	+	331221	0	331221	1	IVNT
rs10103623	rs10103623	chr8:78106082	chr8:77193846	A	G	Arm fat-free mass right	-	Neale B	UKBB	European	2017	-0.01845	0.001675	3.442e-28	-	331221	0	331221	1	IVNT
rs2167733	rs2167733	chr8:78110734	chr8:77198498	G	A	Arm fat-free mass right	-	Neale B	UKBB	European	2017	-0.0184	0.001678	5.603e-28	-	331221	0	331221	1	IVNT
rs823094	rs823094	chr1:205689807	chr1:205720679	G	T	Arm predicted mass left	-	Neale B	UKBB	European	2017	-0.01104	0.00156	1.474e-12	-	331146	0	331146	1	IVNT
rs2724648	rs2724648	chr12:11858191	chr12:11705257	T	C	Arm predicted mass left	-	Neale B	UKBB	European	2017	-0.0134	0.001604	6.786e-17	-	331146	0	331146	1	IVNT
rs28406193	rs28406193	chr12:123891865	chr12:123407318	G	T	Arm predicted mass left	-	Neale B	UKBB	European	2017	-0.01214	0.001911	2.153e-10	-	331146	0	331146	1	IVNT
rs28481863	rs28481863	chr12:123902361	chr12:123417814	A	G	Arm predicted mass left	-	Neale B	UKBB	European	2017	-0.01302	0.001954	2.649e-11	-	331146	0	331146	1	IVNT
rs2364232	rs2364232	chr12:93994827	chr12:93601051	A	C	Arm predicted mass left	-	Neale B	UKBB	European	2017	-0.02224	0.001761	1.512e-36	-	331146	0	331146	1	IVNT
rs71385734	rs71385734	chr16:2160503	chr16:2110502	G	T	Arm predicted mass left	-	Neale B	UKBB	European	2017	-0.02473	0.002062	3.982e-33	-	331146	0	331146	1	IVNT
rs7238093	rs7238093	chr18:20728158	chr18:23148194	A	T	Arm predicted mass left	-	Neale B	UKBB	European	2017	-0.02559	0.001875	2.156e-42	-	331146	0	331146	1	IVNT
rs7244464	rs7244464	chr18:20729714	chr18:23149750	A	C	Arm predicted mass left	-	Neale B	UKBB	European	2017	-0.02554	0.001866	1.274e-42	-	331146	0	331146	1	IVNT
rs8094261	rs8094261	chr18:20746728	chr18:23166764	C	G	Arm predicted mass left	-	Neale B	UKBB	European	2017	0.02207	0.001942	6.647e-30	+	331146	0	331146	1	IVNT
rs1346789	rs1346789	chr2:56092052	chr2:55864917	T	C	Arm predicted mass left	-	Neale B	UKBB	European	2017	0.01294	0.001907	1.141e-11	+	331146	0	331146	1	IVNT
rs3791679	rs3791679	chr2:56096892	chr2:55869757	G	A	Arm predicted mass left	-	Neale B	UKBB	European	2017	-0.01355	0.00184	1.761e-13	-	331146	0	331146	1	IVNT
rs143384	rs143384	chr20:34025756	chr20:35437976	G	A	Arm predicted mass left	-	Neale B	UKBB	European	2017	0.03279	0.001566	2.837e-97	+	331146	0	331146	1	IVNT
rs6763927	rs6763927	chr3:141140366	chr3:141421524	A	T	Arm predicted mass left	-	Neale B	UKBB	European	2017	-0.02695	0.001553	2.014e-67	-	331146	0	331146	1	IVNT
rs7623981	rs7623981	chr3:172135334	chr3:172417544	C	T	Arm predicted mass left	-	Neale B	UKBB	European	2017	-0.0142	0.001555	6.832e-20	-	331146	0	331146	1	IVNT
rs2131354	rs2131354	chr4:145599908	chr4:144678756	G	A	Arm predicted mass left	-	Neale B	UKBB	European	2017	-0.0182	0.001542	3.995e-32	-	331146	0	331146	1	IVNT
rs6537315	rs6537315	chr4:145724712	chr4:144803560	A	G	Arm predicted mass left	-	Neale B	UKBB	European	2017	-0.01855	0.00155	5.41e-33	-	331146	0	331146	1	IVNT
rs6817306	rs6817306	chr4:17868058	chr4:17866435	C	T	Arm predicted mass left	-	Neale B	UKBB	European	2017	-0.02713	0.002196	4.567e-35	-	331146	0	331146	1	IVNT
rs1443537	rs1443537	chr4:82150880	chr4:81229726	C	A	Arm predicted mass left	-	Neale B	UKBB	European	2017	-0.01194	0.001768	1.456e-11	-	331146	0	331146	1	IVNT
rs1712374	rs1712374	chr4:82154710	chr4:81233556	T	C	Arm predicted mass left	-	Neale B	UKBB	European	2017	-0.01207	0.00167	4.809e-13	-	331146	0	331146	1	IVNT
rs409012	rs409012	chr5:77375625	chr5:78079801	A	C	Arm predicted mass left	-	Neale B	UKBB	European	2017	0.01526	0.001786	1.286e-17	+	331146	0	331146	1	IVNT
rs1361107	rs1361107	chr6:126767511	chr6:126446365	A	C	Arm predicted mass left	-	Neale B	UKBB	European	2017	-0.01848	0.001544	5.207e-33	-	331146	0	331146	1	IVNT
rs1159619	rs1159619	chr6:126801144	chr6:126479998	A	C	Arm predicted mass left	-	Neale B	UKBB	European	2017	0.01855	0.001545	3.548e-33	+	331146	0	331146	1	IVNT
rs9496369	rs9496369	chr6:142724918	chr6:142403781	C	T	Arm predicted mass left	-	Neale B	UKBB	European	2017	0.01587	0.001708	1.539e-20	+	331146	0	331146	1	IVNT
rs7770386	rs7770386	chr6:142775657	chr6:142454520	C	T	Arm predicted mass left	-	Neale B	UKBB	European	2017	0.01548	0.001704	1.059e-19	+	331146	0	331146	1	IVNT
rs2814994	rs2814994	chr6:34620153	chr6:34652376	A	T	Arm predicted mass left	-	Neale B	UKBB	European	2017	0.0368	0.00222	1.092e-61	+	331146	0	331146	1	IVNT
rs10103623	rs10103623	chr8:78106082	chr8:77193846	A	G	Arm predicted mass left	-	Neale B	UKBB	European	2017	-0.01921	0.001703	1.679e-29	-	331146	0	331146	1	IVNT
rs2167733	rs2167733	chr8:78110734	chr8:77198498	G	A	Arm predicted mass left	-	Neale B	UKBB	European	2017	-0.01916	0.001706	2.969e-29	-	331146	0	331146	1	IVNT
rs823094	rs823094	chr1:205689807	chr1:205720679	G	T	Arm predicted mass right	-	Neale B	UKBB	European	2017	-0.01162	0.001529	2.873e-14	-	331216	0	331216	1	IVNT
rs2724648	rs2724648	chr12:11858191	chr12:11705257	T	C	Arm predicted mass right	-	Neale B	UKBB	European	2017	-0.01375	0.001573	2.283e-18	-	331216	0	331216	1	IVNT
rs28406193	rs28406193	chr12:123891865	chr12:123407318	G	T	Arm predicted mass right	-	Neale B	UKBB	European	2017	-0.01136	0.001873	1.316e-09	-	331216	0	331216	1	IVNT
rs28481863	rs28481863	chr12:123902361	chr12:123417814	A	G	Arm predicted mass right	-	Neale B	UKBB	European	2017	-0.0119	0.001916	5.231e-10	-	331216	0	331216	1	IVNT
rs2364232	rs2364232	chr12:93994827	chr12:93601051	A	C	Arm predicted mass right	-	Neale B	UKBB	European	2017	-0.02194	0.001726	5.315e-37	-	331216	0	331216	1	IVNT
rs71385734	rs71385734	chr16:2160503	chr16:2110502	G	T	Arm predicted mass right	-	Neale B	UKBB	European	2017	-0.02435	0.002022	2.076e-33	-	331216	0	331216	1	IVNT
rs7238093	rs7238093	chr18:20728158	chr18:23148194	A	T	Arm predicted mass right	-	Neale B	UKBB	European	2017	-0.0254	0.001838	1.996e-43	-	331216	0	331216	1	IVNT
rs7244464	rs7244464	chr18:20729714	chr18:23149750	A	C	Arm predicted mass right	-	Neale B	UKBB	European	2017	-0.02532	0.001829	1.453e-43	-	331216	0	331216	1	IVNT
rs8094261	rs8094261	chr18:20746728	chr18:23166764	C	G	Arm predicted mass right	-	Neale B	UKBB	European	2017	0.02208	0.001904	4.317e-31	+	331216	0	331216	1	IVNT
rs1346789	rs1346789	chr2:56092052	chr2:55864917	T	C	Arm predicted mass right	-	Neale B	UKBB	European	2017	0.01296	0.001869	4.119e-12	+	331216	0	331216	1	IVNT
rs3791679	rs3791679	chr2:56096892	chr2:55869757	G	A	Arm predicted mass right	-	Neale B	UKBB	European	2017	-0.01357	0.001804	5.441e-14	-	331216	0	331216	1	IVNT
rs143384	rs143384	chr20:34025756	chr20:35437976	G	A	Arm predicted mass right	-	Neale B	UKBB	European	2017	0.03233	0.001535	2.202e-98	+	331216	0	331216	1	IVNT
rs6763927	rs6763927	chr3:141140366	chr3:141421524	A	T	Arm predicted mass right	-	Neale B	UKBB	European	2017	-0.02597	0.001523	3.278e-65	-	331216	0	331216	1	IVNT
rs7623981	rs7623981	chr3:172135334	chr3:172417544	C	T	Arm predicted mass right	-	Neale B	UKBB	European	2017	-0.01374	0.001524	2.002e-19	-	331216	0	331216	1	IVNT
rs2131354	rs2131354	chr4:145599908	chr4:144678756	G	A	Arm predicted mass right	-	Neale B	UKBB	European	2017	-0.01803	0.001512	8.98e-33	-	331216	0	331216	1	IVNT
rs6537315	rs6537315	chr4:145724712	chr4:144803560	A	G	Arm predicted mass right	-	Neale B	UKBB	European	2017	-0.01903	0.00152	5.636e-36	-	331216	0	331216	1	IVNT
rs6817306	rs6817306	chr4:17868058	chr4:17866435	C	T	Arm predicted mass right	-	Neale B	UKBB	European	2017	-0.02881	0.002152	7.619e-41	-	331216	0	331216	1	IVNT
rs1443537	rs1443537	chr4:82150880	chr4:81229726	C	A	Arm predicted mass right	-	Neale B	UKBB	European	2017	-0.01133	0.001733	6.226e-11	-	331216	0	331216	1	IVNT
rs1712374	rs1712374	chr4:82154710	chr4:81233556	T	C	Arm predicted mass right	-	Neale B	UKBB	European	2017	-0.01176	0.001637	6.869e-13	-	331216	0	331216	1	IVNT
rs409012	rs409012	chr5:77375625	chr5:78079801	A	C	Arm predicted mass right	-	Neale B	UKBB	European	2017	0.01502	0.00175	9.622e-18	+	331216	0	331216	1	IVNT
rs1361107	rs1361107	chr6:126767511	chr6:126446365	A	C	Arm predicted mass right	-	Neale B	UKBB	European	2017	-0.0192	0.001513	6.902e-37	-	331216	0	331216	1	IVNT
rs1159619	rs1159619	chr6:126801144	chr6:126479998	A	C	Arm predicted mass right	-	Neale B	UKBB	European	2017	0.01929	0.001515	3.943e-37	+	331216	0	331216	1	IVNT
rs9496369	rs9496369	chr6:142724918	chr6:142403781	C	T	Arm predicted mass right	-	Neale B	UKBB	European	2017	0.015	0.001674	3.241e-19	+	331216	0	331216	1	IVNT
rs7770386	rs7770386	chr6:142775657	chr6:142454520	C	T	Arm predicted mass right	-	Neale B	UKBB	European	2017	0.01469	0.001671	1.487e-18	+	331216	0	331216	1	IVNT
rs2814994	rs2814994	chr6:34620153	chr6:34652376	A	T	Arm predicted mass right	-	Neale B	UKBB	European	2017	0.03618	0.002176	4.581e-62	+	331216	0	331216	1	IVNT
rs10103623	rs10103623	chr8:78106082	chr8:77193846	A	G	Arm predicted mass right	-	Neale B	UKBB	European	2017	-0.01839	0.001669	3.262e-28	-	331216	0	331216	1	IVNT
rs2167733	rs2167733	chr8:78110734	chr8:77198498	G	A	Arm predicted mass right	-	Neale B	UKBB	European	2017	-0.01834	0.001672	5.408e-28	-	331216	0	331216	1	IVNT
rs67807996	rs67807996	chr1:149995265	chr1:150023307	A	G	Basal metabolic rate	EFO_0007777	Neale B	UKBB	European	2017	0.01114	0.001697	5.219e-11	+	331307	0	331307	1	IVNT
rs823094	rs823094	chr1:205689807	chr1:205720679	G	T	Basal metabolic rate	EFO_0007777	Neale B	UKBB	European	2017	-0.01202	0.001633	1.782e-13	-	331307	0	331307	1	IVNT
rs2724648	rs2724648	chr12:11858191	chr12:11705257	T	C	Basal metabolic rate	EFO_0007777	Neale B	UKBB	European	2017	-0.01277	0.00168	2.935e-14	-	331307	0	331307	1	IVNT
rs28406193	rs28406193	chr12:123891865	chr12:123407318	G	T	Basal metabolic rate	EFO_0007777	Neale B	UKBB	European	2017	-0.01386	0.002001	4.316e-12	-	331307	0	331307	1	IVNT
rs28481863	rs28481863	chr12:123902361	chr12:123417814	A	G	Basal metabolic rate	EFO_0007777	Neale B	UKBB	European	2017	-0.01484	0.002045	4.027e-13	-	331307	0	331307	1	IVNT
rs2364232	rs2364232	chr12:93994827	chr12:93601051	A	C	Basal metabolic rate	EFO_0007777	Neale B	UKBB	European	2017	-0.02326	0.001843	1.787e-36	-	331307	0	331307	1	IVNT
rs71385734	rs71385734	chr16:2160503	chr16:2110502	G	T	Basal metabolic rate	EFO_0007777	Neale B	UKBB	European	2017	-0.02484	0.002159	1.298e-30	-	331307	0	331307	1	IVNT
rs7238093	rs7238093	chr18:20728158	chr18:23148194	A	T	Basal metabolic rate	EFO_0007777	Neale B	UKBB	European	2017	-0.02725	0.001963	8.338e-44	-	331307	0	331307	1	IVNT
rs7244464	rs7244464	chr18:20729714	chr18:23149750	A	C	Basal metabolic rate	EFO_0007777	Neale B	UKBB	European	2017	-0.02715	0.001954	6.665e-44	-	331307	0	331307	1	IVNT
rs8094261	rs8094261	chr18:20746728	chr18:23166764	C	G	Basal metabolic rate	EFO_0007777	Neale B	UKBB	European	2017	0.02352	0.002033	5.997e-31	+	331307	0	331307	1	IVNT
rs1346789	rs1346789	chr2:56092052	chr2:55864917	T	C	Basal metabolic rate	EFO_0007777	Neale B	UKBB	European	2017	0.01757	0.001996	1.35e-18	+	331307	0	331307	1	IVNT
rs3791679	rs3791679	chr2:56096892	chr2:55869757	G	A	Basal metabolic rate	EFO_0007777	Neale B	UKBB	European	2017	-0.01869	0.001926	2.932e-22	-	331307	0	331307	1	IVNT
rs143384	rs143384	chr20:34025756	chr20:35437976	G	A	Basal metabolic rate	EFO_0007777	Neale B	UKBB	European	2017	0.03677	0.001639	2.313e-111	+	331307	0	331307	1	IVNT
rs6763927	rs6763927	chr3:141140366	chr3:141421524	A	T	Basal metabolic rate	EFO_0007777	Neale B	UKBB	European	2017	-0.03008	0.001626	2.16e-76	-	331307	0	331307	1	IVNT
rs7623981	rs7623981	chr3:172135334	chr3:172417544	C	T	Basal metabolic rate	EFO_0007777	Neale B	UKBB	European	2017	-0.01446	0.001628	6.479e-19	-	331307	0	331307	1	IVNT
rs2131354	rs2131354	chr4:145599908	chr4:144678756	G	A	Basal metabolic rate	EFO_0007777	Neale B	UKBB	European	2017	-0.02074	0.001615	9.141e-38	-	331307	0	331307	1	IVNT
rs6537315	rs6537315	chr4:145724712	chr4:144803560	A	G	Basal metabolic rate	EFO_0007777	Neale B	UKBB	European	2017	-0.02017	0.001623	1.885e-35	-	331307	0	331307	1	IVNT
rs6817306	rs6817306	chr4:17868058	chr4:17866435	C	T	Basal metabolic rate	EFO_0007777	Neale B	UKBB	European	2017	-0.02958	0.002299	6.725e-38	-	331307	0	331307	1	IVNT
rs1443537	rs1443537	chr4:82150880	chr4:81229726	C	A	Basal metabolic rate	EFO_0007777	Neale B	UKBB	European	2017	-0.01187	0.001851	1.422e-10	-	331307	0	331307	1	IVNT
rs1712374	rs1712374	chr4:82154710	chr4:81233556	T	C	Basal metabolic rate	EFO_0007777	Neale B	UKBB	European	2017	-0.01265	0.001748	4.555e-13	-	331307	0	331307	1	IVNT
rs409012	rs409012	chr5:77375625	chr5:78079801	A	C	Basal metabolic rate	EFO_0007777	Neale B	UKBB	European	2017	0.01766	0.001869	3.438e-21	+	331307	0	331307	1	IVNT
rs7766336	rs7766336	chr6:105388405	chr6:104940530	G	T	Basal metabolic rate	EFO_0007777	Neale B	UKBB	European	2017	-0.009988	0.001724	6.906e-09	-	331307	0	331307	1	IVNT
rs314263	rs314263	chr6:105392745	chr6:104944870	C	T	Basal metabolic rate	EFO_0007777	Neale B	UKBB	European	2017	0.01	0.001724	6.548e-09	+	331307	0	331307	1	IVNT
rs1361107	rs1361107	chr6:126767511	chr6:126446365	A	C	Basal metabolic rate	EFO_0007777	Neale B	UKBB	European	2017	-0.01983	0.001616	1.283e-34	-	331307	0	331307	1	IVNT
rs1159619	rs1159619	chr6:126801144	chr6:126479998	A	C	Basal metabolic rate	EFO_0007777	Neale B	UKBB	European	2017	0.01997	0.001618	5.168e-35	+	331307	0	331307	1	IVNT
rs9496369	rs9496369	chr6:142724918	chr6:142403781	C	T	Basal metabolic rate	EFO_0007777	Neale B	UKBB	European	2017	0.01821	0.001788	2.291e-24	+	331307	0	331307	1	IVNT
rs7770386	rs7770386	chr6:142775657	chr6:142454520	C	T	Basal metabolic rate	EFO_0007777	Neale B	UKBB	European	2017	0.01776	0.001784	2.414e-23	+	331307	0	331307	1	IVNT
rs2814994	rs2814994	chr6:34620153	chr6:34652376	A	T	Basal metabolic rate	EFO_0007777	Neale B	UKBB	European	2017	0.0418	0.002324	2.458e-72	+	331307	0	331307	1	IVNT
rs10103623	rs10103623	chr8:78106082	chr8:77193846	A	G	Basal metabolic rate	EFO_0007777	Neale B	UKBB	European	2017	-0.02015	0.001783	1.263e-29	-	331307	0	331307	1	IVNT
rs2167733	rs2167733	chr8:78110734	chr8:77198498	G	A	Basal metabolic rate	EFO_0007777	Neale B	UKBB	European	2017	-0.02011	0.001786	2.132e-29	-	331307	0	331307	1	IVNT
rs2131354	rs2131354	chr4:145599908	chr4:144678756	G	A	Birth weight	EFO_0004344	Neale B	UKBB	European	2017	-0.02522	0.003178	2.122e-15	-	193063	0	193063	1	IVNT
rs6817306	rs6817306	chr4:17868058	chr4:17866435	C	T	Birth weight	EFO_0004344	Neale B	UKBB	European	2017	-0.02721	0.004527	1.853e-09	-	193063	0	193063	1	IVNT
rs9496369	rs9496369	chr6:142724918	chr6:142403781	C	T	Birth weight	EFO_0004344	Neale B	UKBB	European	2017	0.02358	0.003508	1.775e-11	+	193063	0	193063	1	IVNT
rs7770386	rs7770386	chr6:142775657	chr6:142454520	C	T	Birth weight	EFO_0004344	Neale B	UKBB	European	2017	0.02332	0.003501	2.73e-11	+	193063	0	193063	1	IVNT
rs2131354	rs2131354	chr4:145599908	chr4:144678756	G	A	Birth weight of first child	EFO_0004344	Neale B	UKBB	European	2017	-0.02979	0.004464	2.514e-11	-	145558	0	145558	1	-
rs67807996	rs67807996	chr1:149995265	chr1:150023307	A	G	Body fat percentage	EFO_0007800	Neale B	UKBB	European	2017	0.01757	0.001962	3.341e-19	+	331117	0	331117	1	IVNT
rs10520573	rs10520573	chr15:84591575	chr15:83922823	G	A	Body fat percentage	EFO_0007800	Neale B	UKBB	European	2017	0.01691	0.001868	1.422e-19	+	331117	0	331117	1	IVNT
rs1361107	rs1361107	chr6:126767511	chr6:126446365	A	C	Body fat percentage	EFO_0007800	Neale B	UKBB	European	2017	0.01248	0.001869	2.387e-11	+	331117	0	331117	1	IVNT
rs1159619	rs1159619	chr6:126801144	chr6:126479998	A	C	Body fat percentage	EFO_0007800	Neale B	UKBB	European	2017	-0.01232	0.001871	4.534e-11	-	331117	0	331117	1	IVNT
rs2814994	rs2814994	chr6:34620153	chr6:34652376	A	T	Body fat percentage	EFO_0007800	Neale B	UKBB	European	2017	0.02668	0.002688	3.195e-23	+	331117	0	331117	1	IVNT
rs3791679	rs3791679	chr2:56096892	chr2:55869757	G	A	Body height	EFO_0004339	Gudbjartsson DF	18391951	Mixed	2008	NA	NA	6e-11	NA	-	-	-	-	-
rs3791679	rs3791679	chr2:56096892	chr2:55869757	G	A	Body height	EFO_0004339	Okada Y	20189936	East Asian	2010	NA	NA	6e-09	NA	-	-	-	-	-
rs2814994	rs2814994	chr6:34620153	chr6:34652376	A	T	Body mass index	EFO_0004340	Neale B	UKBB	European	2017	0.03269	0.003466	3.966e-21	+	336107	0	336107	1	IVNT
rs2724648	rs2724648	chr12:11858191	chr12:11705257	T	C	Comparative body size at age 10	-	Neale B	UKBB	European	2017	0.009684	0.001734	2.345e-08	+	331693	0	331693	1	-
rs1443537	rs1443537	chr4:82150880	chr4:81229726	C	A	Comparative body size at age 10	-	Neale B	UKBB	European	2017	0.01164	0.001911	1.108e-09	+	331693	0	331693	1	-
rs1712374	rs1712374	chr4:82154710	chr4:81233556	T	C	Comparative body size at age 10	-	Neale B	UKBB	European	2017	0.01084	0.001805	1.901e-09	+	331693	0	331693	1	-
rs409012	rs409012	chr5:77375625	chr5:78079801	A	C	Comparative body size at age 10	-	Neale B	UKBB	European	2017	0.01079	0.00193	2.257e-08	+	331693	0	331693	1	-
rs7766336	rs7766336	chr6:105388405	chr6:104940530	G	T	Comparative body size at age 10	-	Neale B	UKBB	European	2017	0.01018	0.001779	1.058e-08	+	331693	0	331693	1	-
rs314263	rs314263	chr6:105392745	chr6:104944870	C	T	Comparative body size at age 10	-	Neale B	UKBB	European	2017	-0.01013	0.001779	1.234e-08	-	331693	0	331693	1	-
rs67807996	rs67807996	chr1:149995265	chr1:150023307	A	G	Comparative height size at age 10	-	Neale B	UKBB	European	2017	0.03291	0.001746	3.449e-79	+	332021	0	332021	1	-
rs823094	rs823094	chr1:205689807	chr1:205720679	G	T	Comparative height size at age 10	-	Neale B	UKBB	European	2017	-0.01283	0.001681	2.26e-14	-	332021	0	332021	1	-
rs2724648	rs2724648	chr12:11858191	chr12:11705257	T	C	Comparative height size at age 10	-	Neale B	UKBB	European	2017	-0.0227	0.001729	2.314e-39	-	332021	0	332021	1	-
rs28406193	rs28406193	chr12:123891865	chr12:123407318	G	T	Comparative height size at age 10	-	Neale B	UKBB	European	2017	-0.02146	0.00206	2.09e-25	-	332021	0	332021	1	-
rs28481863	rs28481863	chr12:123902361	chr12:123417814	A	G	Comparative height size at age 10	-	Neale B	UKBB	European	2017	-0.02204	0.002106	1.3e-25	-	332021	0	332021	1	-
rs2364232	rs2364232	chr12:93994827	chr12:93601051	A	C	Comparative height size at age 10	-	Neale B	UKBB	European	2017	-0.02087	0.001898	3.997e-28	-	332021	0	332021	1	-
rs11634560	rs11634560	chr15:67467830	chr15:67175492	G	T	Comparative height size at age 10	-	Neale B	UKBB	European	2017	0.01099	0.001818	1.465e-09	+	332021	0	332021	1	-
rs10520573	rs10520573	chr15:84591575	chr15:83922823	G	A	Comparative height size at age 10	-	Neale B	UKBB	European	2017	0.02744	0.001663	3.876e-61	+	332021	0	332021	1	-
rs71385734	rs71385734	chr16:2160503	chr16:2110502	G	T	Comparative height size at age 10	-	Neale B	UKBB	European	2017	-0.02166	0.002223	2.013e-22	-	332021	0	332021	1	-
rs7238093	rs7238093	chr18:20728158	chr18:23148194	A	T	Comparative height size at age 10	-	Neale B	UKBB	European	2017	-0.04081	0.002021	1.306e-90	-	332021	0	332021	1	-
rs7244464	rs7244464	chr18:20729714	chr18:23149750	A	C	Comparative height size at age 10	-	Neale B	UKBB	European	2017	-0.04044	0.002012	7.378e-90	-	332021	0	332021	1	-
rs8094261	rs8094261	chr18:20746728	chr18:23166764	C	G	Comparative height size at age 10	-	Neale B	UKBB	European	2017	0.03564	0.002094	6.151e-65	+	332021	0	332021	1	-
rs1346789	rs1346789	chr2:56092052	chr2:55864917	T	C	Comparative height size at age 10	-	Neale B	UKBB	European	2017	0.0342	0.002054	3.359e-62	+	332021	0	332021	1	-
rs3791679	rs3791679	chr2:56096892	chr2:55869757	G	A	Comparative height size at age 10	-	Neale B	UKBB	European	2017	-0.03852	0.001982	4.471e-84	-	332021	0	332021	1	-
rs143384	rs143384	chr20:34025756	chr20:35437976	G	A	Comparative height size at age 10	-	Neale B	UKBB	European	2017	0.04481	0.001687	2.773e-155	+	332021	0	332021	1	-
rs1326022	rs1326022	chr20:54844025	chr20:56268969	G	A	Comparative height size at age 10	-	Neale B	UKBB	European	2017	-0.01805	0.001824	4.437e-23	-	332021	0	332021	1	-
rs6763927	rs6763927	chr3:141140366	chr3:141421524	A	T	Comparative height size at age 10	-	Neale B	UKBB	European	2017	-0.03603	0.001673	8.942e-103	-	332021	0	332021	1	-
rs7623981	rs7623981	chr3:172135334	chr3:172417544	C	T	Comparative height size at age 10	-	Neale B	UKBB	European	2017	-0.02139	0.001676	2.714e-37	-	332021	0	332021	1	-
rs2131354	rs2131354	chr4:145599908	chr4:144678756	G	A	Comparative height size at age 10	-	Neale B	UKBB	European	2017	-0.02277	0.001663	1.109e-42	-	332021	0	332021	1	-
rs6537315	rs6537315	chr4:145724712	chr4:144803560	A	G	Comparative height size at age 10	-	Neale B	UKBB	European	2017	-0.01601	0.001671	9.666e-22	-	332021	0	332021	1	-
rs6817306	rs6817306	chr4:17868058	chr4:17866435	C	T	Comparative height size at age 10	-	Neale B	UKBB	European	2017	-0.03485	0.002368	4.916e-49	-	332021	0	332021	1	-
rs1443537	rs1443537	chr4:82150880	chr4:81229726	C	A	Comparative height size at age 10	-	Neale B	UKBB	European	2017	-0.01755	0.001906	3.315e-20	-	332021	0	332021	1	-
rs1712374	rs1712374	chr4:82154710	chr4:81233556	T	C	Comparative height size at age 10	-	Neale B	UKBB	European	2017	-0.01968	0.0018	8.379e-28	-	332021	0	332021	1	-
rs409012	rs409012	chr5:77375625	chr5:78079801	A	C	Comparative height size at age 10	-	Neale B	UKBB	European	2017	0.01834	0.001924	1.571e-21	+	332021	0	332021	1	-
rs1361107	rs1361107	chr6:126767511	chr6:126446365	A	C	Comparative height size at age 10	-	Neale B	UKBB	European	2017	-0.0333	0.001663	3.64e-89	-	332021	0	332021	1	-
rs1159619	rs1159619	chr6:126801144	chr6:126479998	A	C	Comparative height size at age 10	-	Neale B	UKBB	European	2017	0.03322	0.001665	1.701e-88	+	332021	0	332021	1	-
rs9496369	rs9496369	chr6:142724918	chr6:142403781	C	T	Comparative height size at age 10	-	Neale B	UKBB	European	2017	0.02943	0.00184	1.493e-57	+	332021	0	332021	1	-
rs7770386	rs7770386	chr6:142775657	chr6:142454520	C	T	Comparative height size at age 10	-	Neale B	UKBB	European	2017	0.02908	0.001837	1.934e-56	+	332021	0	332021	1	-
rs2814994	rs2814994	chr6:34620153	chr6:34652376	A	T	Comparative height size at age 10	-	Neale B	UKBB	European	2017	0.02662	0.002391	8.672e-29	+	332021	0	332021	1	-
rs10103623	rs10103623	chr8:78106082	chr8:77193846	A	G	Comparative height size at age 10	-	Neale B	UKBB	European	2017	-0.03326	0.001835	2.155e-73	-	332021	0	332021	1	-
rs2167733	rs2167733	chr8:78110734	chr8:77198498	G	A	Comparative height size at age 10	-	Neale B	UKBB	European	2017	-0.03323	0.001838	4.89e-73	-	332021	0	332021	1	-
rs1361107	rs1361107	chr6:126767511	chr6:126446365	A	C	Coronary artery disease	EFO_0000378;EFO_0001645	van der Harst P	29212778	Mixed	2018	0.033	0.0057	8.661e-09	+	547261	122733	424528	2	log OR
rs1159619	rs1159619	chr6:126801144	chr6:126479998	A	C	Coronary artery disease	EFO_0000378;EFO_0001645	van der Harst P	29212778	Mixed	2018	-0.033	0.0057	8.89e-09	-	547261	122733	424528	2	log OR
rs2814994	rs2814994	chr6:34620153	chr6:34652376	A	T	Coronary artery disease	EFO_0000378;EFO_0001645	van der Harst P	29212778	Mixed	2018	0.0493	0.0082	2.324e-09	+	547261	122733	424528	2	log OR
rs28406193	rs28406193	chr12:123891865	chr12:123407318	G	T	Diastolic blood pressure	EFO_0006336	Neale B	UKBB	European	2017	0.02117	0.003057	4.392e-12	+	317756	0	317756	1	IVNT
rs28481863	rs28481863	chr12:123902361	chr12:123417814	A	G	Diastolic blood pressure	EFO_0006336	Neale B	UKBB	European	2017	0.02126	0.003126	1.037e-11	+	317756	0	317756	1	IVNT
rs2364232	rs2364232	chr12:93994827	chr12:93601051	A	C	Forced expiratory volume in 1-second	EFO_0004314	Neale B	UKBB	European	2017	-0.02027	0.00238	1.63e-17	-	307638	0	307638	1	IVNT
rs10520573	rs10520573	chr15:84591575	chr15:83922823	G	A	Forced expiratory volume in 1-second	EFO_0004314	Neale B	UKBB	European	2017	0.02388	0.002086	2.432e-30	+	307638	0	307638	1	IVNT
rs1346789	rs1346789	chr2:56092052	chr2:55864917	T	C	Forced expiratory volume in 1-second	EFO_0004314	Neale B	UKBB	European	2017	0.02991	0.002577	3.753e-31	+	307638	0	307638	1	IVNT
rs3791679	rs3791679	chr2:56096892	chr2:55869757	G	A	Forced expiratory volume in 1-second	EFO_0004314	Neale B	UKBB	European	2017	-0.03195	0.002487	9.066e-38	-	307638	0	307638	1	IVNT
rs143384	rs143384	chr20:34025756	chr20:35437976	G	A	Forced expiratory volume in 1-second	EFO_0004314	Neale B	UKBB	European	2017	0.01193	0.002117	1.741e-08	+	307638	0	307638	1	IVNT
rs6763927	rs6763927	chr3:141140366	chr3:141421524	A	T	Forced expiratory volume in 1-second	EFO_0004314	Neale B	UKBB	European	2017	-0.01478	0.002101	2.004e-12	-	307638	0	307638	1	IVNT
rs2131354	rs2131354	chr4:145599908	chr4:144678756	G	A	Forced expiratory volume in 1-second	EFO_0004314	Neale B	UKBB	European	2017	-0.02225	0.002086	1.426e-26	-	307638	0	307638	1	IVNT
rs6537315	rs6537315	chr4:145724712	chr4:144803560	A	G	Forced expiratory volume in 1-second	EFO_0004314	Neale B	UKBB	European	2017	-0.02369	0.002097	1.385e-29	-	307638	0	307638	1	IVNT
rs6817306	rs6817306	chr4:17868058	chr4:17866435	C	T	Forced expiratory volume in 1-second	EFO_0004314	Neale B	UKBB	European	2017	-0.03151	0.002968	2.563e-26	-	307638	0	307638	1	IVNT
rs409012	rs409012	chr5:77375625	chr5:78079801	A	C	Forced expiratory volume in 1-second	EFO_0004314	Neale B	UKBB	European	2017	0.01817	0.002414	5.173e-14	+	307638	0	307638	1	IVNT
rs1361107	rs1361107	chr6:126767511	chr6:126446365	A	C	Forced expiratory volume in 1-second	EFO_0004314	Neale B	UKBB	European	2017	-0.01682	0.002087	7.61e-16	-	307638	0	307638	1	IVNT
rs1159619	rs1159619	chr6:126801144	chr6:126479998	A	C	Forced expiratory volume in 1-second	EFO_0004314	Neale B	UKBB	European	2017	0.01687	0.00209	7.025e-16	+	307638	0	307638	1	IVNT
rs2364232	rs2364232	chr12:93994827	chr12:93601051	A	C	Forced expiratory volume in 1-second, best measure	EFO_0004314	Neale B	UKBB	European	2017	-0.02158	0.002618	1.696e-16	-	255492	0	255492	1	IVNT
rs10520573	rs10520573	chr15:84591575	chr15:83922823	G	A	Forced expiratory volume in 1-second, best measure	EFO_0004314	Neale B	UKBB	European	2017	0.02578	0.002293	2.435e-29	+	255492	0	255492	1	IVNT
rs1346789	rs1346789	chr2:56092052	chr2:55864917	T	C	Forced expiratory volume in 1-second, best measure	EFO_0004314	Neale B	UKBB	European	2017	0.02894	0.002835	1.865e-24	+	255492	0	255492	1	IVNT
rs3791679	rs3791679	chr2:56096892	chr2:55869757	G	A	Forced expiratory volume in 1-second, best measure	EFO_0004314	Neale B	UKBB	European	2017	-0.03143	0.002735	1.509e-30	-	255492	0	255492	1	IVNT
rs143384	rs143384	chr20:34025756	chr20:35437976	G	A	Forced expiratory volume in 1-second, best measure	EFO_0004314	Neale B	UKBB	European	2017	0.01319	0.002326	1.421e-08	+	255492	0	255492	1	IVNT
rs6763927	rs6763927	chr3:141140366	chr3:141421524	A	T	Forced expiratory volume in 1-second, best measure	EFO_0004314	Neale B	UKBB	European	2017	-0.01409	0.002309	1.039e-09	-	255492	0	255492	1	IVNT
rs2131354	rs2131354	chr4:145599908	chr4:144678756	G	A	Forced expiratory volume in 1-second, best measure	EFO_0004314	Neale B	UKBB	European	2017	-0.02329	0.002293	3.108e-24	-	255492	0	255492	1	IVNT
rs6537315	rs6537315	chr4:145724712	chr4:144803560	A	G	Forced expiratory volume in 1-second, best measure	EFO_0004314	Neale B	UKBB	European	2017	-0.02527	0.002303	5.312e-28	-	255492	0	255492	1	IVNT
rs6817306	rs6817306	chr4:17868058	chr4:17866435	C	T	Forced expiratory volume in 1-second, best measure	EFO_0004314	Neale B	UKBB	European	2017	-0.03522	0.003258	3.029e-27	-	255492	0	255492	1	IVNT
rs409012	rs409012	chr5:77375625	chr5:78079801	A	C	Forced expiratory volume in 1-second, best measure	EFO_0004314	Neale B	UKBB	European	2017	0.01862	0.002653	2.268e-12	+	255492	0	255492	1	IVNT
rs1361107	rs1361107	chr6:126767511	chr6:126446365	A	C	Forced expiratory volume in 1-second, best measure	EFO_0004314	Neale B	UKBB	European	2017	-0.01798	0.002292	4.249e-15	-	255492	0	255492	1	IVNT
rs1159619	rs1159619	chr6:126801144	chr6:126479998	A	C	Forced expiratory volume in 1-second, best measure	EFO_0004314	Neale B	UKBB	European	2017	0.01809	0.002294	3.195e-15	+	255492	0	255492	1	IVNT
rs67807996	rs67807996	chr1:149995265	chr1:150023307	A	G	Forced expiratory volume in 1-second, predicted	EFO_0004314	Neale B	UKBB	European	2017	0.0226	0.002871	3.499e-15	+	110423	0	110423	1	IVNT
rs2364232	rs2364232	chr12:93994827	chr12:93601051	A	C	Forced expiratory volume in 1-second, predicted	EFO_0004314	Neale B	UKBB	European	2017	-0.02192	0.003122	2.217e-12	-	110423	0	110423	1	IVNT
rs10520573	rs10520573	chr15:84591575	chr15:83922823	G	A	Forced expiratory volume in 1-second, predicted	EFO_0004314	Neale B	UKBB	European	2017	0.02154	0.00273	3.098e-15	+	110423	0	110423	1	IVNT
rs7238093	rs7238093	chr18:20728158	chr18:23148194	A	T	Forced expiratory volume in 1-second, predicted	EFO_0004314	Neale B	UKBB	European	2017	-0.03406	0.003328	1.394e-24	-	110423	0	110423	1	IVNT
rs7244464	rs7244464	chr18:20729714	chr18:23149750	A	C	Forced expiratory volume in 1-second, predicted	EFO_0004314	Neale B	UKBB	European	2017	-0.03352	0.003312	4.527e-24	-	110423	0	110423	1	IVNT
rs8094261	rs8094261	chr18:20746728	chr18:23166764	C	G	Forced expiratory volume in 1-second, predicted	EFO_0004314	Neale B	UKBB	European	2017	0.02893	0.003448	4.894e-17	+	110423	0	110423	1	IVNT
rs1346789	rs1346789	chr2:56092052	chr2:55864917	T	C	Forced expiratory volume in 1-second, predicted	EFO_0004314	Neale B	UKBB	European	2017	0.01987	0.003377	3.993e-09	+	110423	0	110423	1	IVNT
rs3791679	rs3791679	chr2:56096892	chr2:55869757	G	A	Forced expiratory volume in 1-second, predicted	EFO_0004314	Neale B	UKBB	European	2017	-0.02397	0.003255	1.817e-13	-	110423	0	110423	1	IVNT
rs143384	rs143384	chr20:34025756	chr20:35437976	G	A	Forced expiratory volume in 1-second, predicted	EFO_0004314	Neale B	UKBB	European	2017	0.03162	0.002771	3.732e-30	+	110423	0	110423	1	IVNT
rs6763927	rs6763927	chr3:141140366	chr3:141421524	A	T	Forced expiratory volume in 1-second, predicted	EFO_0004314	Neale B	UKBB	European	2017	-0.03131	0.002749	4.971e-30	-	110423	0	110423	1	IVNT
rs2131354	rs2131354	chr4:145599908	chr4:144678756	G	A	Forced expiratory volume in 1-second, predicted	EFO_0004314	Neale B	UKBB	European	2017	-0.02029	0.002732	1.126e-13	-	110423	0	110423	1	IVNT
rs6537315	rs6537315	chr4:145724712	chr4:144803560	A	G	Forced expiratory volume in 1-second, predicted	EFO_0004314	Neale B	UKBB	European	2017	-0.01848	0.002747	1.751e-11	-	110423	0	110423	1	IVNT
rs6817306	rs6817306	chr4:17868058	chr4:17866435	C	T	Forced expiratory volume in 1-second, predicted	EFO_0004314	Neale B	UKBB	European	2017	-0.0373	0.003876	6.623e-22	-	110423	0	110423	1	IVNT
rs1443537	rs1443537	chr4:82150880	chr4:81229726	C	A	Forced expiratory volume in 1-second, predicted	EFO_0004314	Neale B	UKBB	European	2017	-0.01806	0.003134	8.353e-09	-	110423	0	110423	1	IVNT
rs1712374	rs1712374	chr4:82154710	chr4:81233556	T	C	Forced expiratory volume in 1-second, predicted	EFO_0004314	Neale B	UKBB	European	2017	-0.01968	0.002955	2.734e-11	-	110423	0	110423	1	IVNT
rs7766336	rs7766336	chr6:105388405	chr6:104940530	G	T	Forced expiratory volume in 1-second, predicted	EFO_0004314	Neale B	UKBB	European	2017	-0.02504	0.002923	1.093e-17	-	110423	0	110423	1	IVNT
rs314263	rs314263	chr6:105392745	chr6:104944870	C	T	Forced expiratory volume in 1-second, predicted	EFO_0004314	Neale B	UKBB	European	2017	0.02502	0.002923	1.156e-17	+	110423	0	110423	1	IVNT
rs2181193	rs2181193	chr6:105442327	chr6:104994452	A	T	Forced expiratory volume in 1-second, predicted	EFO_0004314	Neale B	UKBB	European	2017	-0.02326	0.002894	9.12e-16	-	110423	0	110423	1	IVNT
rs1361107	rs1361107	chr6:126767511	chr6:126446365	A	C	Forced expiratory volume in 1-second, predicted	EFO_0004314	Neale B	UKBB	European	2017	-0.01775	0.002734	8.523e-11	-	110423	0	110423	1	IVNT
rs1159619	rs1159619	chr6:126801144	chr6:126479998	A	C	Forced expiratory volume in 1-second, predicted	EFO_0004314	Neale B	UKBB	European	2017	0.01776	0.002737	8.729e-11	+	110423	0	110423	1	IVNT
rs9496369	rs9496369	chr6:142724918	chr6:142403781	C	T	Forced expiratory volume in 1-second, predicted	EFO_0004314	Neale B	UKBB	European	2017	0.02611	0.003028	6.579e-18	+	110423	0	110423	1	IVNT
rs7770386	rs7770386	chr6:142775657	chr6:142454520	C	T	Forced expiratory volume in 1-second, predicted	EFO_0004314	Neale B	UKBB	European	2017	0.02532	0.003021	5.272e-17	+	110423	0	110423	1	IVNT
rs2814994	rs2814994	chr6:34620153	chr6:34652376	A	T	Forced expiratory volume in 1-second, predicted	EFO_0004314	Neale B	UKBB	European	2017	0.02663	0.003926	1.176e-11	+	110423	0	110423	1	IVNT
rs10103623	rs10103623	chr8:78106082	chr8:77193846	A	G	Forced expiratory volume in 1-second, predicted	EFO_0004314	Neale B	UKBB	European	2017	-0.01893	0.003005	3.018e-10	-	110423	0	110423	1	IVNT
rs2167733	rs2167733	chr8:78110734	chr8:77198498	G	A	Forced expiratory volume in 1-second, predicted	EFO_0004314	Neale B	UKBB	European	2017	-0.01895	0.00301	3.066e-10	-	110423	0	110423	1	IVNT
rs67807996	rs67807996	chr1:149995265	chr1:150023307	A	G	Forced vital capacity	EFO_0004312	Neale B	UKBB	European	2017	0.01604	0.002078	1.199e-14	+	307638	0	307638	1	IVNT
rs2364232	rs2364232	chr12:93994827	chr12:93601051	A	C	Forced vital capacity	EFO_0004312	Neale B	UKBB	European	2017	-0.02264	0.002256	1.066e-23	-	307638	0	307638	1	IVNT
rs10520573	rs10520573	chr15:84591575	chr15:83922823	G	A	Forced vital capacity	EFO_0004312	Neale B	UKBB	European	2017	0.01779	0.001978	2.445e-19	+	307638	0	307638	1	IVNT
rs1346789	rs1346789	chr2:56092052	chr2:55864917	T	C	Forced vital capacity	EFO_0004312	Neale B	UKBB	European	2017	0.03957	0.002443	5.478e-59	+	307638	0	307638	1	IVNT
rs3791679	rs3791679	chr2:56096892	chr2:55869757	G	A	Forced vital capacity	EFO_0004312	Neale B	UKBB	European	2017	-0.04147	0.002357	3.122e-69	-	307638	0	307638	1	IVNT
rs143384	rs143384	chr20:34025756	chr20:35437976	G	A	Forced vital capacity	EFO_0004312	Neale B	UKBB	European	2017	0.01316	0.002007	5.422e-11	+	307638	0	307638	1	IVNT
rs6763927	rs6763927	chr3:141140366	chr3:141421524	A	T	Forced vital capacity	EFO_0004312	Neale B	UKBB	European	2017	-0.02035	0.001992	1.686e-24	-	307638	0	307638	1	IVNT
rs2131354	rs2131354	chr4:145599908	chr4:144678756	G	A	Forced vital capacity	EFO_0004312	Neale B	UKBB	European	2017	-0.02337	0.001977	3.102e-32	-	307638	0	307638	1	IVNT
rs6537315	rs6537315	chr4:145724712	chr4:144803560	A	G	Forced vital capacity	EFO_0004312	Neale B	UKBB	European	2017	-0.01927	0.001989	3.365e-22	-	307638	0	307638	1	IVNT
rs6817306	rs6817306	chr4:17868058	chr4:17866435	C	T	Forced vital capacity	EFO_0004312	Neale B	UKBB	European	2017	-0.03496	0.002814	2.006e-35	-	307638	0	307638	1	IVNT
rs1712374	rs1712374	chr4:82154710	chr4:81233556	T	C	Forced vital capacity	EFO_0004312	Neale B	UKBB	European	2017	-0.01229	0.00214	9.418e-09	-	307638	0	307638	1	IVNT
rs409012	rs409012	chr5:77375625	chr5:78079801	A	C	Forced vital capacity	EFO_0004312	Neale B	UKBB	European	2017	0.02225	0.002288	2.412e-22	+	307638	0	307638	1	IVNT
rs7766336	rs7766336	chr6:105388405	chr6:104940530	G	T	Forced vital capacity	EFO_0004312	Neale B	UKBB	European	2017	-0.01373	0.002112	7.929e-11	-	307638	0	307638	1	IVNT
rs314263	rs314263	chr6:105392745	chr6:104944870	C	T	Forced vital capacity	EFO_0004312	Neale B	UKBB	European	2017	0.0137	0.002112	8.603e-11	+	307638	0	307638	1	IVNT
rs2181193	rs2181193	chr6:105442327	chr6:104994452	A	T	Forced vital capacity	EFO_0004312	Neale B	UKBB	European	2017	-0.01312	0.00209	3.47e-10	-	307638	0	307638	1	IVNT
rs1361107	rs1361107	chr6:126767511	chr6:126446365	A	C	Forced vital capacity	EFO_0004312	Neale B	UKBB	European	2017	-0.02253	0.001979	4.893e-30	-	307638	0	307638	1	IVNT
rs1159619	rs1159619	chr6:126801144	chr6:126479998	A	C	Forced vital capacity	EFO_0004312	Neale B	UKBB	European	2017	0.02248	0.001981	8.012e-30	+	307638	0	307638	1	IVNT
rs9496369	rs9496369	chr6:142724918	chr6:142403781	C	T	Forced vital capacity	EFO_0004312	Neale B	UKBB	European	2017	0.0253	0.002189	7.047e-31	+	307638	0	307638	1	IVNT
rs7770386	rs7770386	chr6:142775657	chr6:142454520	C	T	Forced vital capacity	EFO_0004312	Neale B	UKBB	European	2017	0.02487	0.002185	5.314e-30	+	307638	0	307638	1	IVNT
rs10103623	rs10103623	chr8:78106082	chr8:77193846	A	G	Forced vital capacity	EFO_0004312	Neale B	UKBB	European	2017	-0.01405	0.002184	1.234e-10	-	307638	0	307638	1	IVNT
rs2167733	rs2167733	chr8:78110734	chr8:77198498	G	A	Forced vital capacity	EFO_0004312	Neale B	UKBB	European	2017	-0.01409	0.002187	1.187e-10	-	307638	0	307638	1	IVNT
rs67807996	rs67807996	chr1:149995265	chr1:150023307	A	G	Forced vital capacity, best measure	EFO_0004312	Neale B	UKBB	European	2017	0.01492	0.002282	6.256e-11	+	255492	0	255492	1	IVNT
rs2364232	rs2364232	chr12:93994827	chr12:93601051	A	C	Forced vital capacity, best measure	EFO_0004312	Neale B	UKBB	European	2017	-0.0256	0.002479	5.381e-25	-	255492	0	255492	1	IVNT
rs10520573	rs10520573	chr15:84591575	chr15:83922823	G	A	Forced vital capacity, best measure	EFO_0004312	Neale B	UKBB	European	2017	0.02018	0.002171	1.451e-20	+	255492	0	255492	1	IVNT
rs1346789	rs1346789	chr2:56092052	chr2:55864917	T	C	Forced vital capacity, best measure	EFO_0004312	Neale B	UKBB	European	2017	0.03982	0.002684	9.201e-50	+	255492	0	255492	1	IVNT
rs3791679	rs3791679	chr2:56096892	chr2:55869757	G	A	Forced vital capacity, best measure	EFO_0004312	Neale B	UKBB	European	2017	-0.04234	0.002589	4.585e-60	-	255492	0	255492	1	IVNT
rs143384	rs143384	chr20:34025756	chr20:35437976	G	A	Forced vital capacity, best measure	EFO_0004312	Neale B	UKBB	European	2017	0.01565	0.002202	1.212e-12	+	255492	0	255492	1	IVNT
rs6763927	rs6763927	chr3:141140366	chr3:141421524	A	T	Forced vital capacity, best measure	EFO_0004312	Neale B	UKBB	European	2017	-0.02035	0.002186	1.283e-20	-	255492	0	255492	1	IVNT
rs2131354	rs2131354	chr4:145599908	chr4:144678756	G	A	Forced vital capacity, best measure	EFO_0004312	Neale B	UKBB	European	2017	-0.02392	0.002171	3.198e-28	-	255492	0	255492	1	IVNT
rs6537315	rs6537315	chr4:145724712	chr4:144803560	A	G	Forced vital capacity, best measure	EFO_0004312	Neale B	UKBB	European	2017	-0.01984	0.002181	9.49e-20	-	255492	0	255492	1	IVNT
rs6817306	rs6817306	chr4:17868058	chr4:17866435	C	T	Forced vital capacity, best measure	EFO_0004312	Neale B	UKBB	European	2017	-0.03902	0.003084	1.14e-36	-	255492	0	255492	1	IVNT
rs409012	rs409012	chr5:77375625	chr5:78079801	A	C	Forced vital capacity, best measure	EFO_0004312	Neale B	UKBB	European	2017	0.02312	0.002512	3.48e-20	+	255492	0	255492	1	IVNT
rs7766336	rs7766336	chr6:105388405	chr6:104940530	G	T	Forced vital capacity, best measure	EFO_0004312	Neale B	UKBB	European	2017	-0.01387	0.002318	2.218e-09	-	255492	0	255492	1	IVNT
rs314263	rs314263	chr6:105392745	chr6:104944870	C	T	Forced vital capacity, best measure	EFO_0004312	Neale B	UKBB	European	2017	0.01387	0.002318	2.185e-09	+	255492	0	255492	1	IVNT
rs2181193	rs2181193	chr6:105442327	chr6:104994452	A	T	Forced vital capacity, best measure	EFO_0004312	Neale B	UKBB	European	2017	-0.01375	0.002294	2.076e-09	-	255492	0	255492	1	IVNT
rs1361107	rs1361107	chr6:126767511	chr6:126446365	A	C	Forced vital capacity, best measure	EFO_0004312	Neale B	UKBB	European	2017	-0.02506	0.00217	7.589e-31	-	255492	0	255492	1	IVNT
rs1159619	rs1159619	chr6:126801144	chr6:126479998	A	C	Forced vital capacity, best measure	EFO_0004312	Neale B	UKBB	European	2017	0.02509	0.002172	7.651e-31	+	255492	0	255492	1	IVNT
rs9496369	rs9496369	chr6:142724918	chr6:142403781	C	T	Forced vital capacity, best measure	EFO_0004312	Neale B	UKBB	European	2017	0.02456	0.002407	1.954e-24	+	255492	0	255492	1	IVNT
rs7770386	rs7770386	chr6:142775657	chr6:142454520	C	T	Forced vital capacity, best measure	EFO_0004312	Neale B	UKBB	European	2017	0.02427	0.002402	5.495e-24	+	255492	0	255492	1	IVNT
rs10103623	rs10103623	chr8:78106082	chr8:77193846	A	G	Forced vital capacity, best measure	EFO_0004312	Neale B	UKBB	European	2017	-0.0149	0.002396	4.979e-10	-	255492	0	255492	1	IVNT
rs2167733	rs2167733	chr8:78110734	chr8:77198498	G	A	Forced vital capacity, best measure	EFO_0004312	Neale B	UKBB	European	2017	-0.01495	0.0024	4.676e-10	-	255492	0	255492	1	IVNT
rs143384	rs143384	chr20:34025756	chr20:35437976	G	A	Gene expression	NCIT_C16608	GIANT	20881960	European	2010	NA	NA	1.19e-19	NA	133653	-	-	-	-
rs143384	rs143384	chr20:34025756	chr20:35437976	G	A	Gonarthrosis	EFO_0004616	Neale B	UKBB	European	2017	-0.001914	0.0003427	2.355e-08	-	337199	6560	330639	1	risk diff
rs1361107	rs1361107	chr6:126767511	chr6:126446365	A	C	Hair or balding pattern: pattern 3	EFO_0007822	Neale B	UKBB	European	2017	0.009515	0.001597	2.54e-09	+	154988	41584	113404	1	risk diff
rs1159619	rs1159619	chr6:126801144	chr6:126479998	A	C	Hair or balding pattern: pattern 3	EFO_0007822	Neale B	UKBB	European	2017	-0.009687	0.001599	1.373e-09	-	154988	41584	113404	1	risk diff
rs6763927	rs6763927	chr3:141140366	chr3:141421524	A	T	Hair or balding pattern: pattern 4	EFO_0007822	Neale B	UKBB	European	2017	0.01238	0.001401	1.029e-18	+	154988	28389	126599	1	risk diff
rs1361107	rs1361107	chr6:126767511	chr6:126446365	A	C	Hair or balding pattern: pattern 4	EFO_0007822	Neale B	UKBB	European	2017	0.0148	0.001393	2.495e-26	+	154988	28389	126599	1	risk diff
rs1159619	rs1159619	chr6:126801144	chr6:126479998	A	C	Hair or balding pattern: pattern 4	EFO_0007822	Neale B	UKBB	European	2017	-0.0146	0.001395	1.295e-25	-	154988	28389	126599	1	risk diff
rs823094	rs823094	chr1:205689807	chr1:205720679	G	T	Hand grip strength left	EFO_0006941	Neale B	UKBB	European	2017	-0.01286	0.001775	4.347e-13	-	335821	0	335821	1	IVNT
rs71385734	rs71385734	chr16:2160503	chr16:2110502	G	T	Hand grip strength left	EFO_0006941	Neale B	UKBB	European	2017	-0.01638	0.002349	3.12e-12	-	335821	0	335821	1	IVNT
rs7238093	rs7238093	chr18:20728158	chr18:23148194	A	T	Hand grip strength left	EFO_0006941	Neale B	UKBB	European	2017	-0.01639	0.002136	1.675e-14	-	335821	0	335821	1	IVNT
rs7244464	rs7244464	chr18:20729714	chr18:23149750	A	C	Hand grip strength left	EFO_0006941	Neale B	UKBB	European	2017	-0.01622	0.002126	2.331e-14	-	335821	0	335821	1	IVNT
rs8094261	rs8094261	chr18:20746728	chr18:23166764	C	G	Hand grip strength left	EFO_0006941	Neale B	UKBB	European	2017	0.01523	0.002212	5.824e-12	+	335821	0	335821	1	IVNT
rs143384	rs143384	chr20:34025756	chr20:35437976	G	A	Hand grip strength left	EFO_0006941	Neale B	UKBB	European	2017	0.01973	0.001784	1.889e-28	+	335821	0	335821	1	IVNT
rs6763927	rs6763927	chr3:141140366	chr3:141421524	A	T	Hand grip strength left	EFO_0006941	Neale B	UKBB	European	2017	-0.01155	0.001769	6.65e-11	-	335821	0	335821	1	IVNT
rs6817306	rs6817306	chr4:17868058	chr4:17866435	C	T	Hand grip strength left	EFO_0006941	Neale B	UKBB	European	2017	-0.02024	0.002501	5.803e-16	-	335821	0	335821	1	IVNT
rs823094	rs823094	chr1:205689807	chr1:205720679	G	T	Hand grip strength right	EFO_0006941	Neale B	UKBB	European	2017	-0.01455	0.001779	2.881e-16	-	335842	0	335842	1	IVNT
rs71385734	rs71385734	chr16:2160503	chr16:2110502	G	T	Hand grip strength right	EFO_0006941	Neale B	UKBB	European	2017	-0.01549	0.002353	4.61e-11	-	335842	0	335842	1	IVNT
rs7238093	rs7238093	chr18:20728158	chr18:23148194	A	T	Hand grip strength right	EFO_0006941	Neale B	UKBB	European	2017	-0.016	0.002139	7.635e-14	-	335842	0	335842	1	IVNT
rs7244464	rs7244464	chr18:20729714	chr18:23149750	A	C	Hand grip strength right	EFO_0006941	Neale B	UKBB	European	2017	-0.01599	0.002129	6.047e-14	-	335842	0	335842	1	IVNT
rs8094261	rs8094261	chr18:20746728	chr18:23166764	C	G	Hand grip strength right	EFO_0006941	Neale B	UKBB	European	2017	0.01485	0.002216	2.083e-11	+	335842	0	335842	1	IVNT
rs143384	rs143384	chr20:34025756	chr20:35437976	G	A	Hand grip strength right	EFO_0006941	Neale B	UKBB	European	2017	0.02312	0.001787	2.754e-38	+	335842	0	335842	1	IVNT
rs6763927	rs6763927	chr3:141140366	chr3:141421524	A	T	Hand grip strength right	EFO_0006941	Neale B	UKBB	European	2017	-0.01034	0.001772	5.405e-09	-	335842	0	335842	1	IVNT
rs6817306	rs6817306	chr4:17868058	chr4:17866435	C	T	Hand grip strength right	EFO_0006941	Neale B	UKBB	European	2017	-0.02105	0.002505	4.363e-17	-	335842	0	335842	1	IVNT
rs7766336	rs7766336	chr6:105388405	chr6:104940530	G	T	Hand grip strength right	EFO_0006941	Neale B	UKBB	European	2017	-0.01167	0.001878	5.199e-10	-	335842	0	335842	1	IVNT
rs314263	rs314263	chr6:105392745	chr6:104944870	C	T	Hand grip strength right	EFO_0006941	Neale B	UKBB	European	2017	0.01162	0.001878	6.221e-10	+	335842	0	335842	1	IVNT
rs2181193	rs2181193	chr6:105442327	chr6:104994452	A	T	Hand grip strength right	EFO_0006941	Neale B	UKBB	European	2017	-0.0105	0.001859	1.635e-08	-	335842	0	335842	1	IVNT
rs6763927	rs6763927	chr3:141140366	chr3:141421524	A	T	Hayfever, allergic rhinitis or eczema	EFO_0003956;EFO_0005854;EFO_0000274	Neale B	UKBB	European	2017	-0.006272	0.001037	1.456e-09	-	336782	77891	258891	1	risk diff
rs2814994	rs2814994	chr6:34620153	chr6:34652376	A	T	HDL cholesterol	NCIT_C61041;NCIT_C105587	GLGC	20686565	Mixed	2010	NA	NA	3.042e-08	NA	100184	-	-	-	-
rs823094	rs823094	chr1:205689807	chr1:205720679	G	T	Hearing difficulty or problems with background noise	EFO_0004238	Neale B	UKBB	European	2017	-0.006639	0.001201	3.228e-08	-	330759	125089	205670	1	risk diff
rs67807996	rs67807996	chr1:149995265	chr1:150023307	A	G	Heel bone mineral density	EFO_0009270	Neale B	UKBB	European	2017	0.02102	0.003276	1.409e-10	+	194398	0	194398	1	IVNT
rs67807996	rs67807996	chr1:149995265	chr1:150023307	A	G	Height	EFO_0004339	Neale B	UKBB	European	2017	0.03905	0.001818	2.747e-102	+	336474	0	336474	1	IVNT
rs823094	rs823094	chr1:205689807	chr1:205720679	G	T	Height	EFO_0004339	Neale B	UKBB	European	2017	-0.01397	0.001749	1.431e-15	-	336474	0	336474	1	IVNT
rs2724648	rs2724648	chr12:11858191	chr12:11705257	T	C	Height	EFO_0004339	GIANT	20881960	European	2010	NA	NA	1.96e-10	NA	133781	0	133781	46	Z-score
rs2724648	rs2724648	chr12:11858191	chr12:11705257	T	C	Height	EFO_0004339	GIANT	23754948	European	2013	-0.02953	0.004377	1.511e-11	-	133620	0	133620	46	Z-score
rs2724648	rs2724648	chr12:11858191	chr12:11705257	T	C	Height	EFO_0004339	GIANT	25282103	European	2014	-0.03	0.003	1.9e-23	-	253072	0	253072	79	Z-score
rs2724648	rs2724648	chr12:11858191	chr12:11705257	T	C	Height	EFO_0004339	GIANT	20881960	European	2010	NA	NA	1.96e-10	NA	133653	-	-	-	-
rs2724648	rs2724648	chr12:11858191	chr12:11705257	T	C	Height	EFO_0004339	Neale B	UKBB	European	2017	-0.02092	0.0018	3.126e-31	-	336474	0	336474	1	IVNT
rs28406193	rs28406193	chr12:123891865	chr12:123407318	G	T	Height	EFO_0004339	Neale B	UKBB	European	2017	-0.02668	0.002144	1.51e-35	-	336474	0	336474	1	IVNT
rs28481863	rs28481863	chr12:123902361	chr12:123417814	A	G	Height	EFO_0004339	Neale B	UKBB	European	2017	-0.02779	0.002192	8.108e-37	-	336474	0	336474	1	IVNT
rs2364232	rs2364232	chr12:93994827	chr12:93601051	A	C	Height	EFO_0004339	GIANT	20881960	European	2010	NA	NA	4.268e-18	NA	133787	0	133787	46	Z-score
rs2364232	rs2364232	chr12:93994827	chr12:93601051	A	C	Height	EFO_0004339	GIANT	23754948	European	2013	-0.046	0.004936	1.174e-20	-	133626	0	133626	46	Z-score
rs2364232	rs2364232	chr12:93994827	chr12:93601051	A	C	Height	EFO_0004339	GIANT	25282103	European	2014	-0.046	0.0035	1.9e-39	-	246399	0	246399	79	Z-score
rs2364232	rs2364232	chr12:93994827	chr12:93601051	A	C	Height	EFO_0004339	GIANT	20881960	European	2010	NA	NA	4.268e-18	NA	133653	-	-	-	-
rs2364232	rs2364232	chr12:93994827	chr12:93601051	A	C	Height	EFO_0004339	Neale B	UKBB	European	2017	-0.03698	0.001975	3.421e-78	-	336474	0	336474	1	IVNT
rs11634560	rs11634560	chr15:67467830	chr15:67175492	G	T	Height	EFO_0004339	GIANT	25282103	European	2014	0.019	0.0034	3.7e-08	+	251872	0	251872	79	Z-score
rs11634560	rs11634560	chr15:67467830	chr15:67175492	G	T	Height	EFO_0004339	Neale B	UKBB	European	2017	0.013	0.001892	6.347e-12	+	336474	0	336474	1	IVNT
rs10520573	rs10520573	chr15:84591575	chr15:83922823	G	A	Height	EFO_0004339	GIANT	20881960	European	2010	NA	NA	6.576e-18	NA	124862	0	124862	46	Z-score
rs10520573	rs10520573	chr15:84591575	chr15:83922823	G	A	Height	EFO_0004339	GIANT	23754948	European	2013	0.04058	0.004267	1.916e-21	+	124702	0	124702	46	Z-score
rs10520573	rs10520573	chr15:84591575	chr15:83922823	G	A	Height	EFO_0004339	GIANT	25282103	European	2014	0.044	0.003	8.5e-49	+	243728	0	243728	79	Z-score
rs10520573	rs10520573	chr15:84591575	chr15:83922823	G	A	Height	EFO_0004339	GIANT	20881960	European	2010	NA	NA	6.576e-18	NA	133653	-	-	-	-
rs10520573	rs10520573	chr15:84591575	chr15:83922823	G	A	Height	EFO_0004339	Neale B	UKBB	European	2017	0.03716	0.00173	3.153e-102	+	336474	0	336474	1	IVNT
rs71385734	rs71385734	chr16:2160503	chr16:2110502	G	T	Height	EFO_0004339	Neale B	UKBB	European	2017	-0.02915	0.002314	2.293e-36	-	336474	0	336474	1	IVNT
rs7238093	rs7238093	chr18:20728158	chr18:23148194	A	T	Height	EFO_0004339	Neale B	UKBB	European	2017	-0.05074	0.002103	1.503e-128	-	336474	0	336474	1	IVNT
rs7244464	rs7244464	chr18:20729714	chr18:23149750	A	C	Height	EFO_0004339	Neale B	UKBB	European	2017	-0.05043	0.002093	3.478e-128	-	336474	0	336474	1	IVNT
rs8094261	rs8094261	chr18:20746728	chr18:23166764	C	G	Height	EFO_0004339	GIANT	20881960	European	2010	NA	NA	5.093e-14	NA	133841	0	133841	46	Z-score
rs8094261	rs8094261	chr18:20746728	chr18:23166764	C	G	Height	EFO_0004339	GIANT	23754948	European	2013	0.04384	0.005368	3.17e-16	+	133680	0	133680	46	Z-score
rs8094261	rs8094261	chr18:20746728	chr18:23166764	C	G	Height	EFO_0004339	GIANT	25282103	European	2014	0.052	0.0038	8.2e-43	+	252731	0	252731	79	Z-score
rs8094261	rs8094261	chr18:20746728	chr18:23166764	C	G	Height	EFO_0004339	GIANT	20881960	European	2010	NA	NA	5.093e-14	NA	133653	-	-	-	-
rs8094261	rs8094261	chr18:20746728	chr18:23166764	C	G	Height	EFO_0004339	Neale B	UKBB	European	2017	0.04511	0.002179	3.645e-95	+	336474	0	336474	1	IVNT
rs1346789	rs1346789	chr2:56092052	chr2:55864917	T	C	Height	EFO_0004339	GIANT	20881960	European	2010	NA	NA	4.323e-17	NA	132862	0	132862	46	Z-score
rs1346789	rs1346789	chr2:56092052	chr2:55864917	T	C	Height	EFO_0004339	GIANT	23754948	European	2013	0.04683	0.005085	3.273e-20	+	132702	0	132702	46	Z-score
rs1346789	rs1346789	chr2:56092052	chr2:55864917	T	C	Height	EFO_0004339	GIANT	25282103	European	2014	0.053	0.0035	3.4e-51	+	251719	0	251719	79	Z-score
rs1346789	rs1346789	chr2:56092052	chr2:55864917	T	C	Height	EFO_0004339	GIANT	20881960	European	2010	NA	NA	4.323e-17	NA	133653	-	-	-	-
rs1346789	rs1346789	chr2:56092052	chr2:55864917	T	C	Height	EFO_0004339	Neale B	UKBB	European	2017	0.04807	0.002137	5.925e-112	+	336474	0	336474	1	IVNT
rs3791679	rs3791679	chr2:56096892	chr2:55869757	G	A	Height	EFO_0004339	GIANT	28146470	African	2017	-0.11	0.017	5.5e-10	-	27494	0	27494	16	IVNT
rs3791679	rs3791679	chr2:56096892	chr2:55869757	G	A	Height	EFO_0004339	GIANT	20881960	European	2010	NA	NA	1.001e-20	NA	132835	0	132835	46	Z-score
rs3791679	rs3791679	chr2:56096892	chr2:55869757	G	A	Height	EFO_0004339	GIANT	23754948	European	2013	-0.05079	0.005047	7.937e-24	-	132674	0	132674	46	Z-score
rs3791679	rs3791679	chr2:56096892	chr2:55869757	G	A	Height	EFO_0004339	GIANT	25282103	European	2014	-0.06	0.0035	2.4e-67	-	252225	0	252225	79	Z-score
rs3791679	rs3791679	chr2:56096892	chr2:55869757	G	A	Height	EFO_0004339	GIANT	28146470	European	2017	-0.066	0.0029	3.1e-117	-	381625	0	381625	106	IVNT
rs3791679	rs3791679	chr2:56096892	chr2:55869757	G	A	Height	EFO_0004339	GIANT	28146470	Mixed	2017	-0.065	0.0026	1.5e-133	-	458927	0	458927	147	IVNT
rs3791679	rs3791679	chr2:56096892	chr2:55869757	G	A	Height	-	Gudbjartsson DF	18391951	Mixed	2008	NA	NA	5.9e-11	NA	30968	-	-	-	-
rs3791679	rs3791679	chr2:56096892	chr2:55869757	G	A	Height	-	Okada Y	20189936	East Asian	2010	NA	NA	9.5e-10	NA	19633	-	-	-	-
rs3791679	rs3791679	chr2:56096892	chr2:55869757	G	A	Height	EFO_0004339	GIANT	20881960	European	2010	NA	NA	1.001e-20	NA	133653	-	-	-	-
rs3791679	rs3791679	chr2:56096892	chr2:55869757	G	A	Height	EFO_0004339	Gudbjartsson DF	18391951	Mixed	2008	-5.8	0.8863	6e-11	-	-	-	-	-	% SD taller
rs3791679	rs3791679	chr2:56096892	chr2:55869757	G	A	Height	EFO_0004339	Okada Y	20189936	East Asian	2010	-0.07	0.01203	6e-09	-	-	-	-	-	cm increase
rs3791679	rs3791679	chr2:56096892	chr2:55869757	G	A	Height	EFO_0004339	GIANT	23563607	European	2013	NA	NA	8e-16	NA	-	-	-	-	-
rs3791679	rs3791679	chr2:56096892	chr2:55869757	G	A	Height	EFO_0004339	GIANT	25282103	European	2014	-0.06	0.003458	2e-67	-	-	-	-	-	unit increase
rs3791679	rs3791679	chr2:56096892	chr2:55869757	G	A	Height	EFO_0004339	Neale B	UKBB	European	2017	-0.05154	0.002062	1.037e-137	-	336474	0	336474	1	IVNT
rs143384	rs143384	chr20:34025756	chr20:35437976	G	A	Height	EFO_0004339	GIANT	20881960	European	2010	NA	NA	4.939e-39	NA	132033	0	132033	46	Z-score
rs143384	rs143384	chr20:34025756	chr20:35437976	G	A	Height	EFO_0004339	GIANT	23754948	European	2013	0.06477	0.004551	5.726e-46	+	131872	0	131872	46	Z-score
rs143384	rs143384	chr20:34025756	chr20:35437976	G	A	Height	EFO_0004339	GIANT	25282103	European	2014	0.075	0.0032	1.1e-121	+	247786	0	247786	79	Z-score
rs143384	rs143384	chr20:34025756	chr20:35437976	G	A	Height	EFO_0004339	GIANT	28146470	European	2017	0.074	0.0027	5.9e-167	+	381625	0	381625	106	IVNT
rs143384	rs143384	chr20:34025756	chr20:35437976	G	A	Height	EFO_0004339	GIANT	28146470	Mixed	2017	0.071	0.0025	4.1e-181	+	458927	0	458927	147	IVNT
rs143384	rs143384	chr20:34025756	chr20:35437976	G	A	Height	EFO_0004339	GIANT	20881960	European	2010	NA	NA	9.95e-59	NA	133653	-	-	-	-
rs143384	rs143384	chr20:34025756	chr20:35437976	G	A	Height	-	Soler Artigas M	21946350	European	2011	NA	NA	1e-58	NA	48201	-	-	-	-
rs143384	rs143384	chr20:34025756	chr20:35437976	G	A	Height	-	Fatemifar G	23704328	European	2013	NA	NA	1e-58	NA	11513	-	-	-	-
rs143384	rs143384	chr20:34025756	chr20:35437976	G	A	Height	EFO_0004339	GIANT	20881960	European	2010	-0.063	0.003899	1e-58	-	-	-	-	-	unit decrease
rs143384	rs143384	chr20:34025756	chr20:35437976	G	A	Height	EFO_0004339	GIANT	25282103	European	2014	-0.075	0.003197	1e-121	-	-	-	-	-	unit decrease
rs143384	rs143384	chr20:34025756	chr20:35437976	G	A	Height	EFO_0004339	Neale B	UKBB	European	2017	0.06411	0.001754	8.848e-292	+	336474	0	336474	1	IVNT
rs1326022	rs1326022	chr20:54844025	chr20:56268969	G	A	Height	EFO_0004339	GIANT	25282103	European	2014	-0.024	0.0032	1.6e-13	-	252883	0	252883	79	Z-score
rs6763927	rs6763927	chr3:141140366	chr3:141421524	A	T	Height	EFO_0004339	GIANT	20881960	European	2010	NA	NA	4.879e-49	NA	133814	0	133814	46	Z-score
rs6763927	rs6763927	chr3:141140366	chr3:141421524	A	T	Height	EFO_0004339	GIANT	23754948	European	2013	-0.06575	0.004227	1.46e-54	-	133653	0	133653	46	Z-score
rs6763927	rs6763927	chr3:141140366	chr3:141421524	A	T	Height	EFO_0004339	GIANT	25282103	European	2014	-0.077	0.003	4.4e-151	-	252739	0	252739	79	Z-score
rs6763927	rs6763927	chr3:141140366	chr3:141421524	A	T	Height	EFO_0004339	GIANT	20881960	European	2010	NA	NA	4.879e-49	NA	133653	-	-	-	-
rs6763927	rs6763927	chr3:141140366	chr3:141421524	A	T	Height	EFO_0004339	Neale B	UKBB	European	2017	-0.05857	0.00174	6.103e-248	-	336474	0	336474	1	IVNT
rs7623981	rs7623981	chr3:172135334	chr3:172417544	C	T	Height	EFO_0004339	Neale B	UKBB	European	2017	-0.01833	0.001744	8.14e-26	-	336474	0	336474	1	IVNT
rs2131354	rs2131354	chr4:145599908	chr4:144678756	G	A	Height	EFO_0004339	Neale B	UKBB	European	2017	-0.03697	0.00173	2.961e-101	-	336474	0	336474	1	IVNT
rs6537315	rs6537315	chr4:145724712	chr4:144803560	A	G	Height	EFO_0004339	Neale B	UKBB	European	2017	-0.02717	0.001739	5.61e-55	-	336474	0	336474	1	IVNT
rs6817306	rs6817306	chr4:17868058	chr4:17866435	C	T	Height	EFO_0004339	GIANT	20881960	European	2010	NA	NA	1.33e-22	NA	133781	0	133781	46	Z-score
rs6817306	rs6817306	chr4:17868058	chr4:17866435	C	T	Height	EFO_0004339	GIANT	23754948	European	2013	-0.06739	0.006321	1.548e-26	-	133620	0	133620	46	Z-score
rs6817306	rs6817306	chr4:17868058	chr4:17866435	C	T	Height	EFO_0004339	GIANT	25282103	European	2014	-0.071	0.0043	4.5e-60	-	253133	0	253133	79	Z-score
rs6817306	rs6817306	chr4:17868058	chr4:17866435	C	T	Height	-	Soranzo N	19343178	European	2009	NA	NA	3.3e-08	NA	12611	-	-	-	-
rs6817306	rs6817306	chr4:17868058	chr4:17866435	C	T	Height	EFO_0004339	GIANT	20881960	European	2010	NA	NA	1.33e-22	NA	133653	-	-	-	-
rs6817306	rs6817306	chr4:17868058	chr4:17866435	C	T	Height	EFO_0004339	Neale B	UKBB	European	2017	-0.05739	0.002462	4.874e-120	-	336474	0	336474	1	IVNT
rs1443537	rs1443537	chr4:82150880	chr4:81229726	C	A	Height	EFO_0004339	GIANT	20881960	European	2010	NA	NA	8.081e-14	NA	133824	0	133824	46	Z-score
rs1443537	rs1443537	chr4:82150880	chr4:81229726	C	A	Height	EFO_0004339	GIANT	23754948	European	2013	-0.03856	0.004763	5.742e-16	-	133664	0	133664	46	Z-score
rs1443537	rs1443537	chr4:82150880	chr4:81229726	C	A	Height	EFO_0004339	GIANT	25282103	European	2014	-0.044	0.0034	1.4e-39	-	252187	0	252187	79	Z-score
rs1443537	rs1443537	chr4:82150880	chr4:81229726	C	A	Height	EFO_0004339	GIANT	20881960	European	2010	NA	NA	8.081e-14	NA	133653	-	-	-	-
rs1443537	rs1443537	chr4:82150880	chr4:81229726	C	A	Height	EFO_0004339	Neale B	UKBB	European	2017	-0.03057	0.001983	1.394e-53	-	336474	0	336474	1	IVNT
rs1712374	rs1712374	chr4:82154710	chr4:81233556	T	C	Height	EFO_0004339	GIANT	20881960	European	2010	NA	NA	2.91e-15	NA	133812	0	133812	46	Z-score
rs1712374	rs1712374	chr4:82154710	chr4:81233556	T	C	Height	EFO_0004339	GIANT	23754948	European	2013	-0.03815	0.004551	5.119e-17	-	133651	0	133651	46	Z-score
rs1712374	rs1712374	chr4:82154710	chr4:81233556	T	C	Height	EFO_0004339	GIANT	25282103	European	2014	-0.046	0.0032	9.6e-47	-	253083	0	253083	79	Z-score
rs1712374	rs1712374	chr4:82154710	chr4:81233556	T	C	Height	EFO_0004339	GIANT	20881960	European	2010	NA	NA	2.91e-15	NA	133653	-	-	-	-
rs1712374	rs1712374	chr4:82154710	chr4:81233556	T	C	Height	EFO_0004339	Neale B	UKBB	European	2017	-0.03244	0.001873	3.556e-67	-	336474	0	336474	1	IVNT
rs409012	rs409012	chr5:77375625	chr5:78079801	A	C	Height	EFO_0004339	GIANT	25282103	European	2014	0.02	0.0035	1.2e-08	+	253154	0	253154	79	Z-score
rs409012	rs409012	chr5:77375625	chr5:78079801	A	C	Height	EFO_0004339	Neale B	UKBB	European	2017	0.01881	0.002003	5.997e-21	+	336474	0	336474	1	IVNT
rs7766336	rs7766336	chr6:105388405	chr6:104940530	G	T	Height	EFO_0004339	Neale B	UKBB	European	2017	-0.03731	0.001846	9.369e-91	-	336474	0	336474	1	IVNT
rs314263	rs314263	chr6:105392745	chr6:104944870	C	T	Height	EFO_0004339	GIANT	20881960	European	2010	NA	NA	8.313e-18	NA	133653	0	133653	46	Z-score
rs314263	rs314263	chr6:105392745	chr6:104944870	C	T	Height	EFO_0004339	GIANT	23754948	European	2013	0.04084	0.00448	7.702e-20	+	133492	0	133492	46	Z-score
rs314263	rs314263	chr6:105392745	chr6:104944870	C	T	Height	EFO_0004339	GIANT	25282103	European	2014	0.043	0.0031	1e-42	+	252034	0	252034	79	Z-score
rs314263	rs314263	chr6:105392745	chr6:104944870	C	T	Height	EFO_0004339	GIANT	20881960	European	2010	NA	NA	8.313e-18	NA	133653	-	-	-	-
rs314263	rs314263	chr6:105392745	chr6:104944870	C	T	Height	EFO_0004339	GIANT	25282103	European	2014	-0.043	0.003138	1e-42	-	-	-	-	-	unit decrease
rs314263	rs314263	chr6:105392745	chr6:104944870	C	T	Height	EFO_0004339	Neale B	UKBB	European	2017	0.03731	0.001846	9.609e-91	+	336474	0	336474	1	IVNT
rs2181193	rs2181193	chr6:105442327	chr6:104994452	A	T	Height	EFO_0004339	Neale B	UKBB	European	2017	-0.0351	0.001828	3.612e-82	-	336474	0	336474	1	IVNT
rs1361107	rs1361107	chr6:126767511	chr6:126446365	A	C	Height	EFO_0004339	GIANT	20881960	European	2010	NA	NA	1.898e-14	NA	133839	0	133839	46	Z-score
rs1361107	rs1361107	chr6:126767511	chr6:126446365	A	C	Height	EFO_0004339	GIANT	23754948	European	2013	-0.03559	0.004165	1.27e-17	-	133678	0	133678	46	Z-score
rs1361107	rs1361107	chr6:126767511	chr6:126446365	A	C	Height	EFO_0004339	GIANT	25282103	European	2014	-0.039	0.003	1.3e-38	-	244116	0	244116	79	Z-score
rs1361107	rs1361107	chr6:126767511	chr6:126446365	A	C	Height	EFO_0004339	GIANT	20881960	European	2010	NA	NA	1.898e-14	NA	133653	-	-	-	-
rs1361107	rs1361107	chr6:126767511	chr6:126446365	A	C	Height	EFO_0004339	Neale B	UKBB	European	2017	-0.03522	0.001731	5.421e-92	-	336474	0	336474	1	IVNT
rs1159619	rs1159619	chr6:126801144	chr6:126479998	A	C	Height	EFO_0004339	GIANT	20881960	European	2010	NA	NA	3.171e-14	NA	133837	0	133837	46	Z-score
rs1159619	rs1159619	chr6:126801144	chr6:126479998	A	C	Height	EFO_0004339	GIANT	23754948	European	2013	0.03559	0.004165	1.27e-17	+	133676	0	133676	46	Z-score
rs1159619	rs1159619	chr6:126801144	chr6:126479998	A	C	Height	EFO_0004339	GIANT	25282103	European	2014	0.039	0.0029	4.9e-41	+	253223	0	253223	79	Z-score
rs1159619	rs1159619	chr6:126801144	chr6:126479998	A	C	Height	EFO_0004339	GIANT	20881960	European	2010	NA	NA	3.171e-14	NA	133653	-	-	-	-
rs1159619	rs1159619	chr6:126801144	chr6:126479998	A	C	Height	EFO_0004339	Neale B	UKBB	European	2017	0.03521	0.001733	1.141e-91	+	336474	0	336474	1	IVNT
rs9496369	rs9496369	chr6:142724918	chr6:142403781	C	T	Height	EFO_0004339	Neale B	UKBB	European	2017	0.04425	0.001915	4.366e-118	+	336474	0	336474	1	IVNT
rs7770386	rs7770386	chr6:142775657	chr6:142454520	C	T	Height	EFO_0004339	Neale B	UKBB	European	2017	0.04342	0.001911	3.855e-114	+	336474	0	336474	1	IVNT
rs2814994	rs2814994	chr6:34620153	chr6:34652376	A	T	Height	EFO_0004339	GIANT	20881960	European	2010	NA	NA	1.315e-13	NA	133842	0	133842	46	Z-score
rs2814994	rs2814994	chr6:34620153	chr6:34652376	A	T	Height	EFO_0004339	GIANT	23754948	European	2013	0.04717	0.005896	1.245e-15	+	133681	0	133681	46	Z-score
rs2814994	rs2814994	chr6:34620153	chr6:34652376	A	T	Height	EFO_0004339	GIANT	25282103	European	2014	0.056	0.0041	8.4e-42	+	251839	0	251839	79	Z-score
rs2814994	rs2814994	chr6:34620153	chr6:34652376	A	T	Height	EFO_0004339	GIANT	20881960	European	2010	NA	NA	1.315e-13	NA	133653	-	-	-	-
rs2814994	rs2814994	chr6:34620153	chr6:34652376	A	T	Height	EFO_0004339	Neale B	UKBB	European	2017	0.04738	0.002488	8.645e-81	+	336474	0	336474	1	IVNT
rs10103623	rs10103623	chr8:78106082	chr8:77193846	A	G	Height	EFO_0004339	Neale B	UKBB	European	2017	-0.03138	0.00191	1.213e-60	-	336474	0	336474	1	IVNT
rs2167733	rs2167733	chr8:78110734	chr8:77198498	G	A	Height	EFO_0004339	GIANT	20881960	European	2010	NA	NA	1.902e-10	NA	133824	0	133824	46	Z-score
rs2167733	rs2167733	chr8:78110734	chr8:77198498	G	A	Height	EFO_0004339	GIANT	23754948	European	2013	-0.03061	0.004621	3.486e-11	-	133664	0	133664	46	Z-score
rs2167733	rs2167733	chr8:78110734	chr8:77198498	G	A	Height	EFO_0004339	GIANT	25282103	European	2014	-0.035	0.0033	1.6e-27	-	253174	0	253174	79	Z-score
rs2167733	rs2167733	chr8:78110734	chr8:77198498	G	A	Height	EFO_0004339	GIANT	20881960	European	2010	NA	NA	1.902e-10	NA	133653	-	-	-	-
rs2167733	rs2167733	chr8:78110734	chr8:77198498	G	A	Height	EFO_0004339	Neale B	UKBB	European	2017	-0.03134	0.001913	2.76e-60	-	336474	0	336474	1	IVNT
rs2364232	rs2364232	chr12:93994827	chr12:93601051	A	C	Height in females	EFO_0004339	GIANT	23754948	European	2013	-0.046	0.0067	1.56e-11	-	73098	0	73098	46	Z-score
rs10520573	rs10520573	chr15:84591575	chr15:83922823	G	A	Height in females	EFO_0004339	GIANT	23754948	European	2013	0.047	0.0058	1.22e-15	+	69113	0	69113	46	Z-score
rs8094261	rs8094261	chr18:20746728	chr18:23166764	C	G	Height in females	EFO_0004339	GIANT	23754948	European	2013	0.041	0.0074	2.85e-08	+	73130	0	73130	46	Z-score
rs1346789	rs1346789	chr2:56092052	chr2:55864917	T	C	Height in females	EFO_0004339	GIANT	23754948	European	2013	0.044	0.007	2.8e-10	+	72204	0	72204	46	Z-score
rs3791679	rs3791679	chr2:56096892	chr2:55869757	G	A	Height in females	EFO_0004339	GIANT	23754948	European	2013	-0.048	0.0069	4.41e-12	-	72188	0	72188	46	Z-score
rs143384	rs143384	chr20:34025756	chr20:35437976	G	A	Height in females	EFO_0004339	GIANT	23754948	European	2013	0.062	0.0062	2.74e-23	+	72202	0	72202	46	Z-score
rs6763927	rs6763927	chr3:141140366	chr3:141421524	A	T	Height in females	EFO_0004339	GIANT	23754948	European	2013	-0.068	0.0057	7.16e-33	-	73113	0	73113	46	Z-score
rs6817306	rs6817306	chr4:17868058	chr4:17866435	C	T	Height in females	EFO_0004339	GIANT	23754948	European	2013	-0.074	0.0087	1.74e-17	-	73097	0	73097	46	Z-score
rs1712374	rs1712374	chr4:82154710	chr4:81233556	T	C	Height in females	EFO_0004339	GIANT	23754948	European	2013	-0.034	0.0062	2.45e-08	-	73116	0	73116	46	Z-score
rs314263	rs314263	chr6:105392745	chr6:104944870	C	T	Height in females	EFO_0004339	GIANT	23754948	European	2013	0.039	0.0061	2.08e-10	+	73029	0	73029	46	Z-score
rs2364232	rs2364232	chr12:93994827	chr12:93601051	A	C	Height in males	EFO_0004339	GIANT	23754948	European	2013	-0.046	0.0073	2.05e-10	-	60528	0	60528	46	Z-score
rs8094261	rs8094261	chr18:20746728	chr18:23166764	C	G	Height in males	EFO_0004339	GIANT	23754948	European	2013	0.047	0.0078	2.23e-09	+	60550	0	60550	46	Z-score
rs1346789	rs1346789	chr2:56092052	chr2:55864917	T	C	Height in males	EFO_0004339	GIANT	23754948	European	2013	0.05	0.0074	1.36e-11	+	60497	0	60497	46	Z-score
rs3791679	rs3791679	chr2:56096892	chr2:55869757	G	A	Height in males	EFO_0004339	GIANT	23754948	European	2013	-0.054	0.0074	2.51e-13	-	60486	0	60486	46	Z-score
rs143384	rs143384	chr20:34025756	chr20:35437976	G	A	Height in males	EFO_0004339	GIANT	23754948	European	2013	0.068	0.0067	1.76e-24	+	59669	0	59669	46	Z-score
rs6763927	rs6763927	chr3:141140366	chr3:141421524	A	T	Height in males	EFO_0004339	GIANT	23754948	European	2013	-0.063	0.0063	4.23e-24	-	60540	0	60540	46	Z-score
rs6817306	rs6817306	chr4:17868058	chr4:17866435	C	T	Height in males	EFO_0004339	GIANT	23754948	European	2013	-0.06	0.0092	7.42e-11	-	60523	0	60523	46	Z-score
rs1443537	rs1443537	chr4:82150880	chr4:81229726	C	A	Height in males	EFO_0004339	GIANT	23754948	European	2013	-0.045	0.007	1.39e-10	-	60539	0	60539	46	Z-score
rs1712374	rs1712374	chr4:82154710	chr4:81233556	T	C	Height in males	EFO_0004339	GIANT	23754948	European	2013	-0.043	0.0067	1.45e-10	-	60535	0	60535	46	Z-score
rs314263	rs314263	chr6:105392745	chr6:104944870	C	T	Height in males	EFO_0004339	GIANT	23754948	European	2013	0.043	0.0066	1.06e-10	+	60463	0	60463	46	Z-score
rs1361107	rs1361107	chr6:126767511	chr6:126446365	A	C	Height in males	EFO_0004339	GIANT	23754948	European	2013	-0.042	0.0061	6.76e-12	-	60554	0	60554	46	Z-score
rs1159619	rs1159619	chr6:126801144	chr6:126479998	A	C	Height in males	EFO_0004339	GIANT	23754948	European	2013	0.042	0.0061	1.19e-11	+	60553	0	60553	46	Z-score
rs2814994	rs2814994	chr6:34620153	chr6:34652376	A	T	Height in males	EFO_0004339	GIANT	23754948	European	2013	0.053	0.0086	6.91e-10	+	60551	0	60551	46	Z-score
rs1346789	rs1346789	chr2:56092052	chr2:55864917	T	C	Height SDS at age 10 in females and age 12 in males combined	-	EGGC	23449627	European	2013	NA	NA	1.15e-08	NA	14040	-	-	-	-
rs10520573	rs10520573	chr15:84591575	chr15:83922823	G	A	Height SDS for females aged 10 years and males aged 12 years	-	EGGC	23449627	European	2013	0.06768	0.01208	4.376e-08	+	13960	0	13960	9	SDS
rs1346789	rs1346789	chr2:56092052	chr2:55864917	T	C	Height SDS for females aged 10 years and males aged 12 years	-	EGGC	23449627	European	2013	0.0847	0.0145	1.148e-08	+	13960	0	13960	9	SDS
rs6763927	rs6763927	chr3:141140366	chr3:141421524	A	T	Height SDS for females aged 10 years and males aged 12 years	-	EGGC	23449627	European	2013	-0.07435	0.01228	3.285e-09	-	13959	0	13959	9	SDS
rs2167733	rs2167733	chr8:78110734	chr8:77198498	G	A	Height SDS for females aged 10 years and males aged 12 years	-	EGGC	23449627	European	2013	-0.08607	0.01372	8.953e-10	-	13960	0	13960	9	SDS
rs2724648	rs2724648	chr12:11858191	chr12:11705257	T	C	Height tails	EFO_0004339	GIANT	23563607	European	2013	-0.16	0.026	1.3e-09	-	15683	7833	7850	51	log OR
rs10520573	rs10520573	chr15:84591575	chr15:83922823	G	A	Height tails	EFO_0004339	GIANT	23563607	European	2013	0.15	0.026	3.1e-09	+	15364	7679	7685	51	log OR
rs1346789	rs1346789	chr2:56092052	chr2:55864917	T	C	Height tails	EFO_0004339	GIANT	23563607	European	2013	0.2	0.033	2.7e-09	+	13783	6897	6886	51	log OR
rs3791679	rs3791679	chr2:56096892	chr2:55869757	G	A	Height tails	EFO_0004339	GIANT	23563607	European	2013	-0.2	0.033	8.2e-10	-	13778	6896	6882	51	log OR
rs6763927	rs6763927	chr3:141140366	chr3:141421524	A	T	Height tails	EFO_0004339	GIANT	23563607	European	2013	-0.28	0.026	3.9e-28	-	15946	7965	7982	51	log OR
rs6817306	rs6817306	chr4:17868058	chr4:17866435	C	T	Height tails	EFO_0004339	GIANT	23563607	European	2013	-0.28	0.048	7.1e-09	-	10586	5290	5296	51	log OR
rs314263	rs314263	chr6:105392745	chr6:104944870	C	T	Height tails	EFO_0004339	GIANT	23563607	European	2013	0.18	0.028	1.6e-10	+	15142	7561	7581	51	log OR
rs1361107	rs1361107	chr6:126767511	chr6:126446365	A	C	Height tails	EFO_0004339	GIANT	23563607	European	2013	-0.16	0.025	2.1e-10	-	15928	7962	7966	51	log OR
rs1159619	rs1159619	chr6:126801144	chr6:126479998	A	C	Height tails	EFO_0004339	GIANT	23563607	European	2013	0.16	0.025	2.5e-10	+	15927	7961	7966	51	log OR
rs2814994	rs2814994	chr6:34620153	chr6:34652376	A	T	Height tails	EFO_0004339	GIANT	23563607	European	2013	0.26	0.043	1.1e-09	+	11283	5649	5634	51	log OR
rs3791679	rs3791679	chr2:56096892	chr2:55869757	G	A	Height tails upper and lower 5th percentiles	EFO_0004339	GIANT	23563607	European	2013	NA	NA	7.81e-16	NA	16068	-	-	-	-
rs1361107	rs1361107	chr6:126767511	chr6:126446365	A	C	Hematocrit	EFO_0004586	Astle W	27863252	European	2016	0.02602	0.00355	2.302e-13	+	173480	0	173480	2	IVNT
rs1159619	rs1159619	chr6:126801144	chr6:126479998	A	C	Hematocrit	EFO_0004586	Astle W	27863252	European	2016	-0.02571	0.003547	4.21e-13	-	173480	0	173480	2	IVNT
rs1361107	rs1361107	chr6:126767511	chr6:126446365	A	C	Hemoglobin concentration	EFO_0004586	Astle W	27863252	European	2016	0.02156	0.003566	1.496e-09	+	173480	0	173480	2	IVNT
rs1159619	rs1159619	chr6:126801144	chr6:126479998	A	C	Hemoglobin concentration	EFO_0004586	Astle W	27863252	European	2016	-0.02138	0.003563	1.965e-09	-	173480	0	173480	2	IVNT
rs2814994	rs2814994	chr6:34620153	chr6:34652376	A	T	High density lipoprotein	EFO_0004612	GLGC	20686565	Mixed	2010	-0.0338	0.0069	3.042e-08	-	99900	0	99900	46	Z-score
rs67807996	rs67807996	chr1:149995265	chr1:150023307	A	G	Hip circumference	EFO_0005093	Neale B	UKBB	European	2017	0.01989	0.002535	4.293e-15	+	336601	0	336601	1	IVNT
rs10520573	rs10520573	chr15:84591575	chr15:83922823	G	A	Hip circumference	EFO_0005093	Neale B	UKBB	European	2017	0.01562	0.002413	9.51e-11	+	336601	0	336601	1	IVNT
rs71385734	rs71385734	chr16:2160503	chr16:2110502	G	T	Hip circumference	EFO_0005093	Neale B	UKBB	European	2017	-0.02509	0.003226	7.449e-15	-	336601	0	336601	1	IVNT
rs7238093	rs7238093	chr18:20728158	chr18:23148194	A	T	Hip circumference	EFO_0005093	Neale B	UKBB	European	2017	-0.0203	0.002933	4.431e-12	-	336601	0	336601	1	IVNT
rs7244464	rs7244464	chr18:20729714	chr18:23149750	A	C	Hip circumference	EFO_0005093	Neale B	UKBB	European	2017	-0.01998	0.002919	7.568e-12	-	336601	0	336601	1	IVNT
rs8094261	rs8094261	chr18:20746728	chr18:23166764	C	G	Hip circumference	EFO_0005093	Neale B	UKBB	European	2017	0.01723	0.003038	1.411e-08	+	336601	0	336601	1	IVNT
rs143384	rs143384	chr20:34025756	chr20:35437976	G	A	Hip circumference	EFO_0005093	GIANT	25673412	European	2015	0.026	0.0038	3.9e-12	+	212401	0	212401	101	IVNT
rs143384	rs143384	chr20:34025756	chr20:35437976	G	A	Hip circumference	EFO_0005093	GIANT	25673412	Mixed	2015	0.025	0.0037	9.3e-12	+	226793	0	226793	101	IVNT
rs143384	rs143384	chr20:34025756	chr20:35437976	G	A	Hip circumference	EFO_0005093	Neale B	UKBB	European	2017	0.02813	0.002449	1.604e-30	+	336601	0	336601	1	IVNT
rs6763927	rs6763927	chr3:141140366	chr3:141421524	A	T	Hip circumference	EFO_0005093	GIANT	25673412	European	2015	-0.034	0.0044	1.3e-14	-	145351	0	145351	101	IVNT
rs6763927	rs6763927	chr3:141140366	chr3:141421524	A	T	Hip circumference	EFO_0005093	GIANT	25673412	Mixed	2015	-0.034	0.0044	1.3e-14	-	145351	0	145351	101	IVNT
rs6763927	rs6763927	chr3:141140366	chr3:141421524	A	T	Hip circumference	EFO_0005093	Neale B	UKBB	European	2017	-0.02589	0.002429	1.594e-26	-	336601	0	336601	1	IVNT
rs2131354	rs2131354	chr4:145599908	chr4:144678756	G	A	Hip circumference	EFO_0005093	Neale B	UKBB	European	2017	-0.02468	0.002412	1.456e-24	-	336601	0	336601	1	IVNT
rs6537315	rs6537315	chr4:145724712	chr4:144803560	A	G	Hip circumference	EFO_0005093	Neale B	UKBB	European	2017	-0.02297	0.002424	2.674e-21	-	336601	0	336601	1	IVNT
rs409012	rs409012	chr5:77375625	chr5:78079801	A	C	Hip circumference	EFO_0005093	Neale B	UKBB	European	2017	0.02252	0.002792	7.16e-16	+	336601	0	336601	1	IVNT
rs9496369	rs9496369	chr6:142724918	chr6:142403781	C	T	Hip circumference	EFO_0005093	Neale B	UKBB	European	2017	0.02108	0.00267	2.945e-15	+	336601	0	336601	1	IVNT
rs7770386	rs7770386	chr6:142775657	chr6:142454520	C	T	Hip circumference	EFO_0005093	Neale B	UKBB	European	2017	0.0209	0.002666	4.492e-15	+	336601	0	336601	1	IVNT
rs2814994	rs2814994	chr6:34620153	chr6:34652376	A	T	Hip circumference	EFO_0005093	Neale B	UKBB	European	2017	0.05494	0.003468	1.69e-56	+	336601	0	336601	1	IVNT
rs10520573	rs10520573	chr15:84591575	chr15:83922823	G	A	Hip circumference adjusted for BMI	EFO_0005093	GIANT	25673412	Mixed	2015	0.036	0.0035	4.3e-25	+	221561	0	221561	109	IVNT
rs8094261	rs8094261	chr18:20746728	chr18:23166764	C	G	Hip circumference adjusted for BMI	EFO_0005093	GIANT	25673412	Mixed	2015	0.03	0.0044	9.5e-12	+	225283	0	225283	109	IVNT
rs1346789	rs1346789	chr2:56092052	chr2:55864917	T	C	Hip circumference adjusted for BMI	EFO_0005093	GIANT	25673412	Mixed	2015	0.037	0.0047	2.6e-15	+	175917	0	175917	109	IVNT
rs3791679	rs3791679	chr2:56096892	chr2:55869757	G	A	Hip circumference adjusted for BMI	EFO_0005093	GIANT	25673412	Mixed	2015	-0.04	0.0041	2e-22	-	225349	0	225349	109	IVNT
rs143384	rs143384	chr20:34025756	chr20:35437976	G	A	Hip circumference adjusted for BMI	EFO_0005093	GIANT	25673412	Mixed	2015	0.044	0.0037	2.8e-32	+	224057	0	224057	109	IVNT
rs6763927	rs6763927	chr3:141140366	chr3:141421524	A	T	Hip circumference adjusted for BMI	EFO_0005093	GIANT	25673412	Mixed	2015	-0.048	0.0045	1e-26	-	143557	0	143557	109	IVNT
rs1443537	rs1443537	chr4:82150880	chr4:81229726	C	A	Hip circumference adjusted for BMI	EFO_0005093	GIANT	25673412	Mixed	2015	-0.025	0.004	4.7e-10	-	223519	0	223519	109	IVNT
rs1712374	rs1712374	chr4:82154710	chr4:81233556	T	C	Hip circumference adjusted for BMI	EFO_0005093	GIANT	25673412	Mixed	2015	-0.026	0.0037	3.5e-12	-	222863	0	222863	109	IVNT
rs314263	rs314263	chr6:105392745	chr6:104944870	C	T	Hip circumference adjusted for BMI	EFO_0005093	GIANT	25673412	Mixed	2015	0.027	0.0047	6.4e-09	+	143791	0	143791	109	IVNT
rs1361107	rs1361107	chr6:126767511	chr6:126446365	A	C	Hip circumference adjusted for BMI	EFO_0005093	GIANT	25673412	Mixed	2015	-0.025	0.0046	4.5e-08	-	135667	0	135667	109	IVNT
rs143384	rs143384	chr20:34025756	chr20:35437976	G	A	Hip circumference in males	EFO_0005093	GIANT	25673412	Mixed	2015	0.032	0.005	2.3e-10	+	100087	0	100087	101	IVNT
rs6763927	rs6763927	chr3:141140366	chr3:141421524	A	T	Hip circumference in males	EFO_0005093	GIANT	25673412	Mixed	2015	-0.044	0.0065	1e-11	-	57574	0	57574	101	IVNT
rs67807996	rs67807996	chr1:149995265	chr1:150023307	A	G	Impedance of arm left	-	Neale B	UKBB	European	2017	0.03166	0.001806	9.176e-69	+	331292	0	331292	1	IVNT
rs10520573	rs10520573	chr15:84591575	chr15:83922823	G	A	Impedance of arm left	-	Neale B	UKBB	European	2017	0.02585	0.001721	5.178e-51	+	331292	0	331292	1	IVNT
rs71385734	rs71385734	chr16:2160503	chr16:2110502	G	T	Impedance of arm left	-	Neale B	UKBB	European	2017	0.01369	0.0023	2.652e-09	+	331292	0	331292	1	IVNT
rs1346789	rs1346789	chr2:56092052	chr2:55864917	T	C	Impedance of arm left	-	Neale B	UKBB	European	2017	0.01687	0.002126	2.108e-15	+	331292	0	331292	1	IVNT
rs3791679	rs3791679	chr2:56096892	chr2:55869757	G	A	Impedance of arm left	-	Neale B	UKBB	European	2017	-0.0189	0.002051	3.258e-20	-	331292	0	331292	1	IVNT
rs7766336	rs7766336	chr6:105388405	chr6:104940530	G	T	Impedance of arm left	-	Neale B	UKBB	European	2017	-0.02044	0.001836	8.63e-29	-	331292	0	331292	1	IVNT
rs314263	rs314263	chr6:105392745	chr6:104944870	C	T	Impedance of arm left	-	Neale B	UKBB	European	2017	0.02046	0.001836	7.597e-29	+	331292	0	331292	1	IVNT
rs2181193	rs2181193	chr6:105442327	chr6:104994452	A	T	Impedance of arm left	-	Neale B	UKBB	European	2017	-0.02029	0.001817	6.013e-29	-	331292	0	331292	1	IVNT
rs1361107	rs1361107	chr6:126767511	chr6:126446365	A	C	Impedance of arm left	-	Neale B	UKBB	European	2017	0.009583	0.001721	2.591e-08	+	331292	0	331292	1	IVNT
rs1159619	rs1159619	chr6:126801144	chr6:126479998	A	C	Impedance of arm left	-	Neale B	UKBB	European	2017	-0.009694	0.001723	1.859e-08	-	331292	0	331292	1	IVNT
rs67807996	rs67807996	chr1:149995265	chr1:150023307	A	G	Impedance of arm right	-	Neale B	UKBB	European	2017	0.03165	0.001799	2.752e-69	+	331279	0	331279	1	IVNT
rs10520573	rs10520573	chr15:84591575	chr15:83922823	G	A	Impedance of arm right	-	Neale B	UKBB	European	2017	0.02641	0.001713	1.357e-53	+	331279	0	331279	1	IVNT
rs71385734	rs71385734	chr16:2160503	chr16:2110502	G	T	Impedance of arm right	-	Neale B	UKBB	European	2017	0.01405	0.00229	8.496e-10	+	331279	0	331279	1	IVNT
rs1346789	rs1346789	chr2:56092052	chr2:55864917	T	C	Impedance of arm right	-	Neale B	UKBB	European	2017	0.01704	0.002117	8.354e-16	+	331279	0	331279	1	IVNT
rs3791679	rs3791679	chr2:56096892	chr2:55869757	G	A	Impedance of arm right	-	Neale B	UKBB	European	2017	-0.01886	0.002043	2.667e-20	-	331279	0	331279	1	IVNT
rs7766336	rs7766336	chr6:105388405	chr6:104940530	G	T	Impedance of arm right	-	Neale B	UKBB	European	2017	-0.02062	0.001828	1.68e-29	-	331279	0	331279	1	IVNT
rs314263	rs314263	chr6:105392745	chr6:104944870	C	T	Impedance of arm right	-	Neale B	UKBB	European	2017	0.02065	0.001828	1.428e-29	+	331279	0	331279	1	IVNT
rs2181193	rs2181193	chr6:105442327	chr6:104994452	A	T	Impedance of arm right	-	Neale B	UKBB	European	2017	-0.02034	0.001809	2.583e-29	-	331279	0	331279	1	IVNT
rs1361107	rs1361107	chr6:126767511	chr6:126446365	A	C	Impedance of arm right	-	Neale B	UKBB	European	2017	0.009524	0.001714	2.758e-08	+	331279	0	331279	1	IVNT
rs1159619	rs1159619	chr6:126801144	chr6:126479998	A	C	Impedance of arm right	-	Neale B	UKBB	European	2017	-0.009657	0.001716	1.832e-08	-	331279	0	331279	1	IVNT
rs10520573	rs10520573	chr15:84591575	chr15:83922823	G	A	Impedance of leg left	-	Neale B	UKBB	European	2017	0.04319	0.002221	3.382e-84	+	331296	0	331296	1	IVNT
rs143384	rs143384	chr20:34025756	chr20:35437976	G	A	Impedance of leg left	-	Neale B	UKBB	European	2017	-0.02091	0.002255	1.87e-20	-	331296	0	331296	1	IVNT
rs7766336	rs7766336	chr6:105388405	chr6:104940530	G	T	Impedance of leg left	-	Neale B	UKBB	European	2017	-0.0145	0.002371	9.675e-10	-	331296	0	331296	1	IVNT
rs314263	rs314263	chr6:105392745	chr6:104944870	C	T	Impedance of leg left	-	Neale B	UKBB	European	2017	0.01442	0.002371	1.174e-09	+	331296	0	331296	1	IVNT
rs2181193	rs2181193	chr6:105442327	chr6:104994452	A	T	Impedance of leg left	-	Neale B	UKBB	European	2017	-0.01396	0.002346	2.698e-09	-	331296	0	331296	1	IVNT
rs2814994	rs2814994	chr6:34620153	chr6:34652376	A	T	Impedance of leg left	-	Neale B	UKBB	European	2017	-0.01986	0.003196	5.171e-10	-	331296	0	331296	1	IVNT
rs67807996	rs67807996	chr1:149995265	chr1:150023307	A	G	Impedance of leg right	-	Neale B	UKBB	European	2017	0.01469	0.002315	2.235e-10	+	331301	0	331301	1	IVNT
rs10520573	rs10520573	chr15:84591575	chr15:83922823	G	A	Impedance of leg right	-	Neale B	UKBB	European	2017	0.04501	0.002204	1.176e-92	+	331301	0	331301	1	IVNT
rs143384	rs143384	chr20:34025756	chr20:35437976	G	A	Impedance of leg right	-	Neale B	UKBB	European	2017	-0.02021	0.002238	1.706e-19	-	331301	0	331301	1	IVNT
rs7766336	rs7766336	chr6:105388405	chr6:104940530	G	T	Impedance of leg right	-	Neale B	UKBB	European	2017	-0.01497	0.002352	1.988e-10	-	331301	0	331301	1	IVNT
rs314263	rs314263	chr6:105392745	chr6:104944870	C	T	Impedance of leg right	-	Neale B	UKBB	European	2017	0.01491	0.002352	2.308e-10	+	331301	0	331301	1	IVNT
rs2181193	rs2181193	chr6:105442327	chr6:104994452	A	T	Impedance of leg right	-	Neale B	UKBB	European	2017	-0.01435	0.002328	7.222e-10	-	331301	0	331301	1	IVNT
rs2814994	rs2814994	chr6:34620153	chr6:34652376	A	T	Impedance of leg right	-	Neale B	UKBB	European	2017	-0.02027	0.003172	1.65e-10	-	331301	0	331301	1	IVNT
rs67807996	rs67807996	chr1:149995265	chr1:150023307	A	G	Impedance of whole body	-	Neale B	UKBB	European	2017	0.026	0.001951	1.643e-40	+	331284	0	331284	1	IVNT
rs10520573	rs10520573	chr15:84591575	chr15:83922823	G	A	Impedance of whole body	-	Neale B	UKBB	European	2017	0.03468	0.001857	9.127e-78	+	331284	0	331284	1	IVNT
rs1346789	rs1346789	chr2:56092052	chr2:55864917	T	C	Impedance of whole body	-	Neale B	UKBB	European	2017	0.01475	0.002295	1.309e-10	+	331284	0	331284	1	IVNT
rs3791679	rs3791679	chr2:56096892	chr2:55869757	G	A	Impedance of whole body	-	Neale B	UKBB	European	2017	-0.01601	0.002215	4.898e-13	-	331284	0	331284	1	IVNT
rs143384	rs143384	chr20:34025756	chr20:35437976	G	A	Impedance of whole body	-	Neale B	UKBB	European	2017	-0.01092	0.001886	7.094e-09	-	331284	0	331284	1	IVNT
rs7766336	rs7766336	chr6:105388405	chr6:104940530	G	T	Impedance of whole body	-	Neale B	UKBB	European	2017	-0.01912	0.001982	5.074e-22	-	331284	0	331284	1	IVNT
rs314263	rs314263	chr6:105392745	chr6:104944870	C	T	Impedance of whole body	-	Neale B	UKBB	European	2017	0.01911	0.001982	5.572e-22	+	331284	0	331284	1	IVNT
rs2181193	rs2181193	chr6:105442327	chr6:104994452	A	T	Impedance of whole body	-	Neale B	UKBB	European	2017	-0.01889	0.001962	6.3e-22	-	331284	0	331284	1	IVNT
rs1361107	rs1361107	chr6:126767511	chr6:126446365	A	C	Impedance of whole body	-	Neale B	UKBB	European	2017	0.01098	0.001859	3.457e-09	+	331284	0	331284	1	IVNT
rs1159619	rs1159619	chr6:126801144	chr6:126479998	A	C	Impedance of whole body	-	Neale B	UKBB	European	2017	-0.01115	0.001861	2.071e-09	-	331284	0	331284	1	IVNT
rs143384	rs143384	chr20:34025756	chr20:35437976	G	A	Infant length	EFO_0006785	EGGC	25281659	European	2014	0.058	0.009208	3e-10	+	-	-	-	-	unit increase
rs1346789	rs1346789	chr2:56092052	chr2:55864917	T	C	Inguinal hernia	-	Neale B	UKBB	European	2017	0.004535	0.0004757	1.532e-21	+	337199	8815	328384	1	risk diff
rs3791679	rs3791679	chr2:56096892	chr2:55869757	G	A	Inguinal hernia	-	Neale B	UKBB	European	2017	-0.004767	0.000459	2.909e-25	-	337199	8815	328384	1	risk diff
rs143384	rs143384	chr20:34025756	chr20:35437976	G	A	Internal derangement of knee	EFO_0009507	Neale B	UKBB	European	2017	-0.002321	0.0003654	2.124e-10	-	337199	7489	329710	1	risk diff
rs143384	rs143384	chr20:34025756	chr20:35437976	G	A	Joint mobility Beighton score	EFO_0007905	Pickrell JK	27182965	European	2016	NA	NA	1e-12	NA	-	-	-	-	unit decrease
rs10520573	rs10520573	chr15:84591575	chr15:83922823	G	A	Leg fat mass left	-	Neale B	UKBB	European	2017	0.01139	0.001926	3.377e-09	+	331275	0	331275	1	IVNT
rs71385734	rs71385734	chr16:2160503	chr16:2110502	G	T	Leg fat mass left	-	Neale B	UKBB	European	2017	-0.01858	0.002574	5.24e-13	-	331275	0	331275	1	IVNT
rs6763927	rs6763927	chr3:141140366	chr3:141421524	A	T	Leg fat mass left	-	Neale B	UKBB	European	2017	-0.01453	0.001939	6.598e-14	-	331275	0	331275	1	IVNT
rs409012	rs409012	chr5:77375625	chr5:78079801	A	C	Leg fat mass left	-	Neale B	UKBB	European	2017	0.01383	0.002228	5.371e-10	+	331275	0	331275	1	IVNT
rs2814994	rs2814994	chr6:34620153	chr6:34652376	A	T	Leg fat mass left	-	Neale B	UKBB	European	2017	0.03523	0.00277	4.89e-37	+	331275	0	331275	1	IVNT
rs10520573	rs10520573	chr15:84591575	chr15:83922823	G	A	Leg fat mass right	-	Neale B	UKBB	European	2017	0.01262	0.001948	9.281e-11	+	331293	0	331293	1	IVNT
rs71385734	rs71385734	chr16:2160503	chr16:2110502	G	T	Leg fat mass right	-	Neale B	UKBB	European	2017	-0.01813	0.002604	3.316e-12	-	331293	0	331293	1	IVNT
rs6763927	rs6763927	chr3:141140366	chr3:141421524	A	T	Leg fat mass right	-	Neale B	UKBB	European	2017	-0.01487	0.001961	3.361e-14	-	331293	0	331293	1	IVNT
rs409012	rs409012	chr5:77375625	chr5:78079801	A	C	Leg fat mass right	-	Neale B	UKBB	European	2017	0.01437	0.002254	1.838e-10	+	331293	0	331293	1	IVNT
rs2814994	rs2814994	chr6:34620153	chr6:34652376	A	T	Leg fat mass right	-	Neale B	UKBB	European	2017	0.03537	0.002802	1.601e-36	+	331293	0	331293	1	IVNT
rs10520573	rs10520573	chr15:84591575	chr15:83922823	G	A	Leg fat percentage left	-	Neale B	UKBB	European	2017	0.009718	0.001524	1.809e-10	+	331278	0	331278	1	IVNT
rs143384	rs143384	chr20:34025756	chr20:35437976	G	A	Leg fat percentage left	-	Neale B	UKBB	European	2017	-0.009522	0.001547	7.48e-10	-	331278	0	331278	1	IVNT
rs1361107	rs1361107	chr6:126767511	chr6:126446365	A	C	Leg fat percentage left	-	Neale B	UKBB	European	2017	0.009429	0.001524	6.155e-10	+	331278	0	331278	1	IVNT
rs1159619	rs1159619	chr6:126801144	chr6:126479998	A	C	Leg fat percentage left	-	Neale B	UKBB	European	2017	-0.009382	0.001526	7.836e-10	-	331278	0	331278	1	IVNT
rs2814994	rs2814994	chr6:34620153	chr6:34652376	A	T	Leg fat percentage left	-	Neale B	UKBB	European	2017	0.01785	0.002192	3.864e-16	+	331278	0	331278	1	IVNT
rs10520573	rs10520573	chr15:84591575	chr15:83922823	G	A	Leg fat percentage right	-	Neale B	UKBB	European	2017	0.01166	0.001543	4.177e-14	+	331296	0	331296	1	IVNT
rs143384	rs143384	chr20:34025756	chr20:35437976	G	A	Leg fat percentage right	-	Neale B	UKBB	European	2017	-0.009861	0.001567	3.09e-10	-	331296	0	331296	1	IVNT
rs6817306	rs6817306	chr4:17868058	chr4:17866435	C	T	Leg fat percentage right	-	Neale B	UKBB	European	2017	0.01228	0.002196	2.274e-08	+	331296	0	331296	1	IVNT
rs1361107	rs1361107	chr6:126767511	chr6:126446365	A	C	Leg fat percentage right	-	Neale B	UKBB	European	2017	0.009562	0.001544	5.847e-10	+	331296	0	331296	1	IVNT
rs1159619	rs1159619	chr6:126801144	chr6:126479998	A	C	Leg fat percentage right	-	Neale B	UKBB	European	2017	-0.00946	0.001546	9.314e-10	-	331296	0	331296	1	IVNT
rs2814994	rs2814994	chr6:34620153	chr6:34652376	A	T	Leg fat percentage right	-	Neale B	UKBB	European	2017	0.01784	0.00222	9.396e-16	+	331296	0	331296	1	IVNT
rs67807996	rs67807996	chr1:149995265	chr1:150023307	A	G	Leg fat-free mass left	-	Neale B	UKBB	European	2017	0.01422	0.001685	3.13e-17	+	331258	0	331258	1	IVNT
rs823094	rs823094	chr1:205689807	chr1:205720679	G	T	Leg fat-free mass left	-	Neale B	UKBB	European	2017	-0.01149	0.001621	1.367e-12	-	331258	0	331258	1	IVNT
rs2724648	rs2724648	chr12:11858191	chr12:11705257	T	C	Leg fat-free mass left	-	Neale B	UKBB	European	2017	-0.009259	0.001668	2.847e-08	-	331258	0	331258	1	IVNT
rs28406193	rs28406193	chr12:123891865	chr12:123407318	G	T	Leg fat-free mass left	-	Neale B	UKBB	European	2017	-0.01302	0.001987	5.665e-11	-	331258	0	331258	1	IVNT
rs28481863	rs28481863	chr12:123902361	chr12:123417814	A	G	Leg fat-free mass left	-	Neale B	UKBB	European	2017	-0.01424	0.002031	2.4e-12	-	331258	0	331258	1	IVNT
rs2364232	rs2364232	chr12:93994827	chr12:93601051	A	C	Leg fat-free mass left	-	Neale B	UKBB	European	2017	-0.02025	0.001831	2.006e-28	-	331258	0	331258	1	IVNT
rs71385734	rs71385734	chr16:2160503	chr16:2110502	G	T	Leg fat-free mass left	-	Neale B	UKBB	European	2017	-0.02149	0.002144	1.219e-23	-	331258	0	331258	1	IVNT
rs7238093	rs7238093	chr18:20728158	chr18:23148194	A	T	Leg fat-free mass left	-	Neale B	UKBB	European	2017	-0.02104	0.00195	3.701e-27	-	331258	0	331258	1	IVNT
rs7244464	rs7244464	chr18:20729714	chr18:23149750	A	C	Leg fat-free mass left	-	Neale B	UKBB	European	2017	-0.02098	0.00194	3.015e-27	-	331258	0	331258	1	IVNT
rs8094261	rs8094261	chr18:20746728	chr18:23166764	C	G	Leg fat-free mass left	-	Neale B	UKBB	European	2017	0.01777	0.002019	1.359e-18	+	331258	0	331258	1	IVNT
rs1346789	rs1346789	chr2:56092052	chr2:55864917	T	C	Leg fat-free mass left	-	Neale B	UKBB	European	2017	0.0169	0.001982	1.51e-17	+	331258	0	331258	1	IVNT
rs3791679	rs3791679	chr2:56096892	chr2:55869757	G	A	Leg fat-free mass left	-	Neale B	UKBB	European	2017	-0.01827	0.001913	1.289e-21	-	331258	0	331258	1	IVNT
rs143384	rs143384	chr20:34025756	chr20:35437976	G	A	Leg fat-free mass left	-	Neale B	UKBB	European	2017	0.0353	0.001628	3.362e-104	+	331258	0	331258	1	IVNT
rs6763927	rs6763927	chr3:141140366	chr3:141421524	A	T	Leg fat-free mass left	-	Neale B	UKBB	European	2017	-0.02728	0.001615	5.152e-64	-	331258	0	331258	1	IVNT
rs7623981	rs7623981	chr3:172135334	chr3:172417544	C	T	Leg fat-free mass left	-	Neale B	UKBB	European	2017	-0.01271	0.001617	3.764e-15	-	331258	0	331258	1	IVNT
rs2131354	rs2131354	chr4:145599908	chr4:144678756	G	A	Leg fat-free mass left	-	Neale B	UKBB	European	2017	-0.01971	0.001604	1.042e-34	-	331258	0	331258	1	IVNT
rs6537315	rs6537315	chr4:145724712	chr4:144803560	A	G	Leg fat-free mass left	-	Neale B	UKBB	European	2017	-0.01867	0.001612	4.925e-31	-	331258	0	331258	1	IVNT
rs6817306	rs6817306	chr4:17868058	chr4:17866435	C	T	Leg fat-free mass left	-	Neale B	UKBB	European	2017	-0.02606	0.002283	3.577e-30	-	331258	0	331258	1	IVNT
rs1443537	rs1443537	chr4:82150880	chr4:81229726	C	A	Leg fat-free mass left	-	Neale B	UKBB	European	2017	-0.01004	0.001838	4.675e-08	-	331258	0	331258	1	IVNT
rs1712374	rs1712374	chr4:82154710	chr4:81233556	T	C	Leg fat-free mass left	-	Neale B	UKBB	European	2017	-0.01142	0.001736	4.822e-11	-	331258	0	331258	1	IVNT
rs409012	rs409012	chr5:77375625	chr5:78079801	A	C	Leg fat-free mass left	-	Neale B	UKBB	European	2017	0.01773	0.001856	1.297e-21	+	331258	0	331258	1	IVNT
rs7766336	rs7766336	chr6:105388405	chr6:104940530	G	T	Leg fat-free mass left	-	Neale B	UKBB	European	2017	-0.009618	0.001712	1.932e-08	-	331258	0	331258	1	IVNT
rs314263	rs314263	chr6:105392745	chr6:104944870	C	T	Leg fat-free mass left	-	Neale B	UKBB	European	2017	0.009647	0.001712	1.752e-08	+	331258	0	331258	1	IVNT
rs1361107	rs1361107	chr6:126767511	chr6:126446365	A	C	Leg fat-free mass left	-	Neale B	UKBB	European	2017	-0.01635	0.001605	2.244e-24	-	331258	0	331258	1	IVNT
rs1159619	rs1159619	chr6:126801144	chr6:126479998	A	C	Leg fat-free mass left	-	Neale B	UKBB	European	2017	0.01655	0.001607	6.885e-25	+	331258	0	331258	1	IVNT
rs9496369	rs9496369	chr6:142724918	chr6:142403781	C	T	Leg fat-free mass left	-	Neale B	UKBB	European	2017	0.01626	0.001775	5.367e-20	+	331258	0	331258	1	IVNT
rs7770386	rs7770386	chr6:142775657	chr6:142454520	C	T	Leg fat-free mass left	-	Neale B	UKBB	European	2017	0.01592	0.001772	2.633e-19	+	331258	0	331258	1	IVNT
rs2814994	rs2814994	chr6:34620153	chr6:34652376	A	T	Leg fat-free mass left	-	Neale B	UKBB	European	2017	0.03982	0.002308	1.049e-66	+	331258	0	331258	1	IVNT
rs10103623	rs10103623	chr8:78106082	chr8:77193846	A	G	Leg fat-free mass left	-	Neale B	UKBB	European	2017	-0.01818	0.00177	1.004e-24	-	331258	0	331258	1	IVNT
rs2167733	rs2167733	chr8:78110734	chr8:77198498	G	A	Leg fat-free mass left	-	Neale B	UKBB	European	2017	-0.01815	0.001774	1.451e-24	-	331258	0	331258	1	IVNT
rs67807996	rs67807996	chr1:149995265	chr1:150023307	A	G	Leg fat-free mass right	-	Neale B	UKBB	European	2017	0.01285	0.001684	2.358e-14	+	331285	0	331285	1	IVNT
rs823094	rs823094	chr1:205689807	chr1:205720679	G	T	Leg fat-free mass right	-	Neale B	UKBB	European	2017	-0.01211	0.001621	7.804e-14	-	331285	0	331285	1	IVNT
rs2724648	rs2724648	chr12:11858191	chr12:11705257	T	C	Leg fat-free mass right	-	Neale B	UKBB	European	2017	-0.009473	0.001667	1.339e-08	-	331285	0	331285	1	IVNT
rs28406193	rs28406193	chr12:123891865	chr12:123407318	G	T	Leg fat-free mass right	-	Neale B	UKBB	European	2017	-0.0131	0.001986	4.275e-11	-	331285	0	331285	1	IVNT
rs28481863	rs28481863	chr12:123902361	chr12:123417814	A	G	Leg fat-free mass right	-	Neale B	UKBB	European	2017	-0.01433	0.002031	1.729e-12	-	331285	0	331285	1	IVNT
rs2364232	rs2364232	chr12:93994827	chr12:93601051	A	C	Leg fat-free mass right	-	Neale B	UKBB	European	2017	-0.02058	0.00183	2.415e-29	-	331285	0	331285	1	IVNT
rs71385734	rs71385734	chr16:2160503	chr16:2110502	G	T	Leg fat-free mass right	-	Neale B	UKBB	European	2017	-0.02172	0.002143	3.916e-24	-	331285	0	331285	1	IVNT
rs7238093	rs7238093	chr18:20728158	chr18:23148194	A	T	Leg fat-free mass right	-	Neale B	UKBB	European	2017	-0.02004	0.001949	8.307e-25	-	331285	0	331285	1	IVNT
rs7244464	rs7244464	chr18:20729714	chr18:23149750	A	C	Leg fat-free mass right	-	Neale B	UKBB	European	2017	-0.01998	0.00194	7.222e-25	-	331285	0	331285	1	IVNT
rs8094261	rs8094261	chr18:20746728	chr18:23166764	C	G	Leg fat-free mass right	-	Neale B	UKBB	European	2017	0.01687	0.002019	6.382e-17	+	331285	0	331285	1	IVNT
rs1346789	rs1346789	chr2:56092052	chr2:55864917	T	C	Leg fat-free mass right	-	Neale B	UKBB	European	2017	0.01616	0.001981	3.507e-16	+	331285	0	331285	1	IVNT
rs3791679	rs3791679	chr2:56096892	chr2:55869757	G	A	Leg fat-free mass right	-	Neale B	UKBB	European	2017	-0.01751	0.001912	5.436e-20	-	331285	0	331285	1	IVNT
rs143384	rs143384	chr20:34025756	chr20:35437976	G	A	Leg fat-free mass right	-	Neale B	UKBB	European	2017	0.03613	0.001627	3.639e-109	+	331285	0	331285	1	IVNT
rs6763927	rs6763927	chr3:141140366	chr3:141421524	A	T	Leg fat-free mass right	-	Neale B	UKBB	European	2017	-0.02702	0.001614	6.826e-63	-	331285	0	331285	1	IVNT
rs7623981	rs7623981	chr3:172135334	chr3:172417544	C	T	Leg fat-free mass right	-	Neale B	UKBB	European	2017	-0.01283	0.001616	2.06e-15	-	331285	0	331285	1	IVNT
rs2131354	rs2131354	chr4:145599908	chr4:144678756	G	A	Leg fat-free mass right	-	Neale B	UKBB	European	2017	-0.01958	0.001603	2.589e-34	-	331285	0	331285	1	IVNT
rs6537315	rs6537315	chr4:145724712	chr4:144803560	A	G	Leg fat-free mass right	-	Neale B	UKBB	European	2017	-0.01887	0.001611	1.087e-31	-	331285	0	331285	1	IVNT
rs6817306	rs6817306	chr4:17868058	chr4:17866435	C	T	Leg fat-free mass right	-	Neale B	UKBB	European	2017	-0.02744	0.002282	2.74e-33	-	331285	0	331285	1	IVNT
rs1443537	rs1443537	chr4:82150880	chr4:81229726	C	A	Leg fat-free mass right	-	Neale B	UKBB	European	2017	-0.01012	0.001837	3.608e-08	-	331285	0	331285	1	IVNT
rs1712374	rs1712374	chr4:82154710	chr4:81233556	T	C	Leg fat-free mass right	-	Neale B	UKBB	European	2017	-0.01152	0.001735	3.121e-11	-	331285	0	331285	1	IVNT
rs409012	rs409012	chr5:77375625	chr5:78079801	A	C	Leg fat-free mass right	-	Neale B	UKBB	European	2017	0.01699	0.001856	5.323e-20	+	331285	0	331285	1	IVNT
rs1361107	rs1361107	chr6:126767511	chr6:126446365	A	C	Leg fat-free mass right	-	Neale B	UKBB	European	2017	-0.01726	0.001604	5.246e-27	-	331285	0	331285	1	IVNT
rs1159619	rs1159619	chr6:126801144	chr6:126479998	A	C	Leg fat-free mass right	-	Neale B	UKBB	European	2017	0.01745	0.001606	1.68e-27	+	331285	0	331285	1	IVNT
rs9496369	rs9496369	chr6:142724918	chr6:142403781	C	T	Leg fat-free mass right	-	Neale B	UKBB	European	2017	0.01654	0.001775	1.138e-20	+	331285	0	331285	1	IVNT
rs7770386	rs7770386	chr6:142775657	chr6:142454520	C	T	Leg fat-free mass right	-	Neale B	UKBB	European	2017	0.01624	0.001771	4.861e-20	+	331285	0	331285	1	IVNT
rs2814994	rs2814994	chr6:34620153	chr6:34652376	A	T	Leg fat-free mass right	-	Neale B	UKBB	European	2017	0.03951	0.002307	9.961e-66	+	331285	0	331285	1	IVNT
rs10103623	rs10103623	chr8:78106082	chr8:77193846	A	G	Leg fat-free mass right	-	Neale B	UKBB	European	2017	-0.01876	0.00177	3.083e-26	-	331285	0	331285	1	IVNT
rs2167733	rs2167733	chr8:78110734	chr8:77198498	G	A	Leg fat-free mass right	-	Neale B	UKBB	European	2017	-0.01871	0.001773	4.904e-26	-	331285	0	331285	1	IVNT
rs67807996	rs67807996	chr1:149995265	chr1:150023307	A	G	Leg predicted mass left	-	Neale B	UKBB	European	2017	0.01403	0.001673	5.222e-17	+	331253	0	331253	1	IVNT
rs823094	rs823094	chr1:205689807	chr1:205720679	G	T	Leg predicted mass left	-	Neale B	UKBB	European	2017	-0.01147	0.00161	1.077e-12	-	331253	0	331253	1	IVNT
rs2724648	rs2724648	chr12:11858191	chr12:11705257	T	C	Leg predicted mass left	-	Neale B	UKBB	European	2017	-0.009289	0.001657	2.067e-08	-	331253	0	331253	1	IVNT
rs28406193	rs28406193	chr12:123891865	chr12:123407318	G	T	Leg predicted mass left	-	Neale B	UKBB	European	2017	-0.01282	0.001973	8.139e-11	-	331253	0	331253	1	IVNT
rs28481863	rs28481863	chr12:123902361	chr12:123417814	A	G	Leg predicted mass left	-	Neale B	UKBB	European	2017	-0.01406	0.002018	3.157e-12	-	331253	0	331253	1	IVNT
rs2364232	rs2364232	chr12:93994827	chr12:93601051	A	C	Leg predicted mass left	-	Neale B	UKBB	European	2017	-0.02002	0.001818	3.517e-28	-	331253	0	331253	1	IVNT
rs71385734	rs71385734	chr16:2160503	chr16:2110502	G	T	Leg predicted mass left	-	Neale B	UKBB	European	2017	-0.02152	0.00213	5.308e-24	-	331253	0	331253	1	IVNT
rs7238093	rs7238093	chr18:20728158	chr18:23148194	A	T	Leg predicted mass left	-	Neale B	UKBB	European	2017	-0.02078	0.001936	7.269e-27	-	331253	0	331253	1	IVNT
rs7244464	rs7244464	chr18:20729714	chr18:23149750	A	C	Leg predicted mass left	-	Neale B	UKBB	European	2017	-0.02071	0.001927	6.208e-27	-	331253	0	331253	1	IVNT
rs8094261	rs8094261	chr18:20746728	chr18:23166764	C	G	Leg predicted mass left	-	Neale B	UKBB	European	2017	0.01763	0.002006	1.534e-18	+	331253	0	331253	1	IVNT
rs1346789	rs1346789	chr2:56092052	chr2:55864917	T	C	Leg predicted mass left	-	Neale B	UKBB	European	2017	0.01693	0.001969	7.873e-18	+	331253	0	331253	1	IVNT
rs3791679	rs3791679	chr2:56096892	chr2:55869757	G	A	Leg predicted mass left	-	Neale B	UKBB	European	2017	-0.01829	0.0019	6.029e-22	-	331253	0	331253	1	IVNT
rs143384	rs143384	chr20:34025756	chr20:35437976	G	A	Leg predicted mass left	-	Neale B	UKBB	European	2017	0.03511	0.001617	1.848e-104	+	331253	0	331253	1	IVNT
rs6763927	rs6763927	chr3:141140366	chr3:141421524	A	T	Leg predicted mass left	-	Neale B	UKBB	European	2017	-0.02706	0.001604	7.851e-64	-	331253	0	331253	1	IVNT
rs7623981	rs7623981	chr3:172135334	chr3:172417544	C	T	Leg predicted mass left	-	Neale B	UKBB	European	2017	-0.01277	0.001606	1.784e-15	-	331253	0	331253	1	IVNT
rs2131354	rs2131354	chr4:145599908	chr4:144678756	G	A	Leg predicted mass left	-	Neale B	UKBB	European	2017	-0.01957	0.001593	1.046e-34	-	331253	0	331253	1	IVNT
rs6537315	rs6537315	chr4:145724712	chr4:144803560	A	G	Leg predicted mass left	-	Neale B	UKBB	European	2017	-0.01849	0.001601	7.456e-31	-	331253	0	331253	1	IVNT
rs6817306	rs6817306	chr4:17868058	chr4:17866435	C	T	Leg predicted mass left	-	Neale B	UKBB	European	2017	-0.02596	0.002267	2.4e-30	-	331253	0	331253	1	IVNT
rs1443537	rs1443537	chr4:82150880	chr4:81229726	C	A	Leg predicted mass left	-	Neale B	UKBB	European	2017	-0.01001	0.001825	4.125e-08	-	331253	0	331253	1	IVNT
rs1712374	rs1712374	chr4:82154710	chr4:81233556	T	C	Leg predicted mass left	-	Neale B	UKBB	European	2017	-0.01136	0.001724	4.457e-11	-	331253	0	331253	1	IVNT
rs409012	rs409012	chr5:77375625	chr5:78079801	A	C	Leg predicted mass left	-	Neale B	UKBB	European	2017	0.01764	0.001844	1.102e-21	+	331253	0	331253	1	IVNT
rs7766336	rs7766336	chr6:105388405	chr6:104940530	G	T	Leg predicted mass left	-	Neale B	UKBB	European	2017	-0.009647	0.0017	1.403e-08	-	331253	0	331253	1	IVNT
rs314263	rs314263	chr6:105392745	chr6:104944870	C	T	Leg predicted mass left	-	Neale B	UKBB	European	2017	0.009678	0.0017	1.258e-08	+	331253	0	331253	1	IVNT
rs1361107	rs1361107	chr6:126767511	chr6:126446365	A	C	Leg predicted mass left	-	Neale B	UKBB	European	2017	-0.01616	0.001594	3.815e-24	-	331253	0	331253	1	IVNT
rs1159619	rs1159619	chr6:126801144	chr6:126479998	A	C	Leg predicted mass left	-	Neale B	UKBB	European	2017	0.01636	0.001596	1.143e-24	+	331253	0	331253	1	IVNT
rs9496369	rs9496369	chr6:142724918	chr6:142403781	C	T	Leg predicted mass left	-	Neale B	UKBB	European	2017	0.01594	0.001763	1.552e-19	+	331253	0	331253	1	IVNT
rs7770386	rs7770386	chr6:142775657	chr6:142454520	C	T	Leg predicted mass left	-	Neale B	UKBB	European	2017	0.01562	0.00176	6.907e-19	+	331253	0	331253	1	IVNT
rs2814994	rs2814994	chr6:34620153	chr6:34652376	A	T	Leg predicted mass left	-	Neale B	UKBB	European	2017	0.03938	0.002292	3.817e-66	+	331253	0	331253	1	IVNT
rs10103623	rs10103623	chr8:78106082	chr8:77193846	A	G	Leg predicted mass left	-	Neale B	UKBB	European	2017	-0.01817	0.001758	5.109e-25	-	331253	0	331253	1	IVNT
rs2167733	rs2167733	chr8:78110734	chr8:77198498	G	A	Leg predicted mass left	-	Neale B	UKBB	European	2017	-0.01814	0.001762	7.383e-25	-	331253	0	331253	1	IVNT
rs67807996	rs67807996	chr1:149995265	chr1:150023307	A	G	Leg predicted mass right	-	Neale B	UKBB	European	2017	0.01275	0.001673	2.507e-14	+	331285	0	331285	1	IVNT
rs823094	rs823094	chr1:205689807	chr1:205720679	G	T	Leg predicted mass right	-	Neale B	UKBB	European	2017	-0.01201	0.00161	8.617e-14	-	331285	0	331285	1	IVNT
rs2724648	rs2724648	chr12:11858191	chr12:11705257	T	C	Leg predicted mass right	-	Neale B	UKBB	European	2017	-0.009514	0.001657	9.317e-09	-	331285	0	331285	1	IVNT
rs28406193	rs28406193	chr12:123891865	chr12:123407318	G	T	Leg predicted mass right	-	Neale B	UKBB	European	2017	-0.01299	0.001973	4.627e-11	-	331285	0	331285	1	IVNT
rs28481863	rs28481863	chr12:123902361	chr12:123417814	A	G	Leg predicted mass right	-	Neale B	UKBB	European	2017	-0.01423	0.002017	1.742e-12	-	331285	0	331285	1	IVNT
rs2364232	rs2364232	chr12:93994827	chr12:93601051	A	C	Leg predicted mass right	-	Neale B	UKBB	European	2017	-0.02041	0.001818	3.103e-29	-	331285	0	331285	1	IVNT
rs71385734	rs71385734	chr16:2160503	chr16:2110502	G	T	Leg predicted mass right	-	Neale B	UKBB	European	2017	-0.02138	0.002129	1.031e-23	-	331285	0	331285	1	IVNT
rs7238093	rs7238093	chr18:20728158	chr18:23148194	A	T	Leg predicted mass right	-	Neale B	UKBB	European	2017	-0.0197	0.001936	2.655e-24	-	331285	0	331285	1	IVNT
rs7244464	rs7244464	chr18:20729714	chr18:23149750	A	C	Leg predicted mass right	-	Neale B	UKBB	European	2017	-0.01961	0.001927	2.484e-24	-	331285	0	331285	1	IVNT
rs8094261	rs8094261	chr18:20746728	chr18:23166764	C	G	Leg predicted mass right	-	Neale B	UKBB	European	2017	0.01659	0.002006	1.308e-16	+	331285	0	331285	1	IVNT
rs1346789	rs1346789	chr2:56092052	chr2:55864917	T	C	Leg predicted mass right	-	Neale B	UKBB	European	2017	0.01609	0.001968	3.043e-16	+	331285	0	331285	1	IVNT
rs3791679	rs3791679	chr2:56096892	chr2:55869757	G	A	Leg predicted mass right	-	Neale B	UKBB	European	2017	-0.01745	0.0019	4.134e-20	-	331285	0	331285	1	IVNT
rs143384	rs143384	chr20:34025756	chr20:35437976	G	A	Leg predicted mass right	-	Neale B	UKBB	European	2017	0.03593	0.001617	2.408e-109	+	331285	0	331285	1	IVNT
rs6763927	rs6763927	chr3:141140366	chr3:141421524	A	T	Leg predicted mass right	-	Neale B	UKBB	European	2017	-0.02687	0.001604	5.614e-63	-	331285	0	331285	1	IVNT
rs7623981	rs7623981	chr3:172135334	chr3:172417544	C	T	Leg predicted mass right	-	Neale B	UKBB	European	2017	-0.01266	0.001605	3.08e-15	-	331285	0	331285	1	IVNT
rs2131354	rs2131354	chr4:145599908	chr4:144678756	G	A	Leg predicted mass right	-	Neale B	UKBB	European	2017	-0.01932	0.001593	7.285e-34	-	331285	0	331285	1	IVNT
rs6537315	rs6537315	chr4:145724712	chr4:144803560	A	G	Leg predicted mass right	-	Neale B	UKBB	European	2017	-0.01858	0.001601	3.819e-31	-	331285	0	331285	1	IVNT
rs6817306	rs6817306	chr4:17868058	chr4:17866435	C	T	Leg predicted mass right	-	Neale B	UKBB	European	2017	-0.02718	0.002267	4.128e-33	-	331285	0	331285	1	IVNT
rs1443537	rs1443537	chr4:82150880	chr4:81229726	C	A	Leg predicted mass right	-	Neale B	UKBB	European	2017	-0.01012	0.001825	2.985e-08	-	331285	0	331285	1	IVNT
rs1712374	rs1712374	chr4:82154710	chr4:81233556	T	C	Leg predicted mass right	-	Neale B	UKBB	European	2017	-0.01149	0.001724	2.612e-11	-	331285	0	331285	1	IVNT
rs409012	rs409012	chr5:77375625	chr5:78079801	A	C	Leg predicted mass right	-	Neale B	UKBB	European	2017	0.0167	0.001844	1.295e-19	+	331285	0	331285	1	IVNT
rs1361107	rs1361107	chr6:126767511	chr6:126446365	A	C	Leg predicted mass right	-	Neale B	UKBB	European	2017	-0.01717	0.001594	4.677e-27	-	331285	0	331285	1	IVNT
rs1159619	rs1159619	chr6:126801144	chr6:126479998	A	C	Leg predicted mass right	-	Neale B	UKBB	European	2017	0.01735	0.001596	1.534e-27	+	331285	0	331285	1	IVNT
rs9496369	rs9496369	chr6:142724918	chr6:142403781	C	T	Leg predicted mass right	-	Neale B	UKBB	European	2017	0.01645	0.001763	1.069e-20	+	331285	0	331285	1	IVNT
rs7770386	rs7770386	chr6:142775657	chr6:142454520	C	T	Leg predicted mass right	-	Neale B	UKBB	European	2017	0.01614	0.00176	4.637e-20	+	331285	0	331285	1	IVNT
rs2814994	rs2814994	chr6:34620153	chr6:34652376	A	T	Leg predicted mass right	-	Neale B	UKBB	European	2017	0.03923	0.002292	1.167e-65	+	331285	0	331285	1	IVNT
rs10103623	rs10103623	chr8:78106082	chr8:77193846	A	G	Leg predicted mass right	-	Neale B	UKBB	European	2017	-0.01862	0.001758	3.262e-26	-	331285	0	331285	1	IVNT
rs2167733	rs2167733	chr8:78110734	chr8:77198498	G	A	Leg predicted mass right	-	Neale B	UKBB	European	2017	-0.01858	0.001761	5.23e-26	-	331285	0	331285	1	IVNT
rs28406193	rs28406193	chr12:123891865	chr12:123407318	G	T	Lymphocyte count	EFO_0004586	Astle W	27863252	European	2016	-0.02667	0.004469	2.426e-09	-	173480	0	173480	2	IVNT
rs28481863	rs28481863	chr12:123902361	chr12:123417814	A	G	Lymphocyte count	EFO_0004586	Astle W	27863252	European	2016	-0.02686	0.00457	4.166e-09	-	173480	0	173480	2	IVNT
rs6763927	rs6763927	chr3:141140366	chr3:141421524	A	T	Lymphocyte count	EFO_0004586	Astle W	27863252	European	2016	-0.02858	0.003649	4.845e-15	-	173480	0	173480	2	IVNT
rs28406193	rs28406193	chr12:123891865	chr12:123407318	G	T	Lymphocyte percentage of white cells	EFO_0004586	Astle W	27863252	European	2016	-0.0322	0.004423	3.328e-13	-	173480	0	173480	2	IVNT
rs28481863	rs28481863	chr12:123902361	chr12:123417814	A	G	Lymphocyte percentage of white cells	EFO_0004586	Astle W	27863252	European	2016	-0.03207	0.004523	1.347e-12	-	173480	0	173480	2	IVNT
rs6763927	rs6763927	chr3:141140366	chr3:141421524	A	T	Lymphocyte percentage of white cells	EFO_0004586	Astle W	27863252	European	2016	-0.02145	0.003611	2.84e-09	-	173480	0	173480	2	IVNT
rs6763927	rs6763927	chr3:141140366	chr3:141421524	A	T	Mean corpuscular hemoglobin	EFO_0004586	Astle W	27863252	European	2016	0.03255	0.003587	1.124e-19	+	173480	0	173480	2	IVNT
rs6763927	rs6763927	chr3:141140366	chr3:141421524	A	T	Mean corpuscular volume	EFO_0004586	Astle W	27863252	European	2016	0.03668	0.003577	1.117e-24	+	173480	0	173480	2	IVNT
rs7238093	rs7238093	chr18:20728158	chr18:23148194	A	T	Mean platelet volume	EFO_0004586	Astle W	27863252	European	2016	-0.03162	0.00442	8.401e-13	-	173480	0	173480	2	IVNT
rs7244464	rs7244464	chr18:20729714	chr18:23149750	A	C	Mean platelet volume	EFO_0004586	Astle W	27863252	European	2016	-0.0314	0.004402	9.743e-13	-	173480	0	173480	2	IVNT
rs8094261	rs8094261	chr18:20746728	chr18:23166764	C	G	Mean platelet volume	EFO_0004586	Astle W	27863252	European	2016	0.02861	0.004583	4.304e-10	+	173480	0	173480	2	IVNT
rs7766336	rs7766336	chr6:105388405	chr6:104940530	G	T	Menarche age at onset	EFO_0004703	Pickrell JK	27182965	European	2016	NA	NA	4e-57	NA	-	-	-	-	unit increase
rs823094	rs823094	chr1:205689807	chr1:205720679	G	T	Monocyte percentage of white cells	EFO_0004586	Astle W	27863252	European	2016	0.01814	0.003281	3.213e-08	+	173480	0	173480	2	IVNT
rs1346789	rs1346789	chr2:56092052	chr2:55864917	T	C	Mononeuropathies of upper limb	EFO_0009558	Neale B	UKBB	European	2017	-0.002216	0.0003951	2.036e-08	-	337199	5886	331313	1	risk diff
rs3791679	rs3791679	chr2:56096892	chr2:55869757	G	A	Mononeuropathies of upper limb	EFO_0009558	Neale B	UKBB	European	2017	0.002394	0.0003813	3.41e-10	+	337199	5886	331313	1	risk diff
rs6763927	rs6763927	chr3:141140366	chr3:141421524	A	T	Myopia	HP_0000545	Kiefer	23468642	European	2013	NA	NA	5.3e-10	NA	45771	-	-	-	-
rs28406193	rs28406193	chr12:123891865	chr12:123407318	G	T	Neutrophil percentage of white cells	EFO_0004586	Astle W	27863252	European	2016	0.02476	0.004431	2.305e-08	+	173480	0	173480	2	IVNT
rs28406193	rs28406193	chr12:123891865	chr12:123407318	G	T	No blood clot, bronchitis, emphysema, asthma, rhinitis, eczema or allergy diagnosed by doctor	-	Neale B	UKBB	European	2017	-0.008169	0.001413	7.495e-09	-	336782	228530	108252	1	risk diff
rs6763927	rs6763927	chr3:141140366	chr3:141421524	A	T	No blood clot, bronchitis, emphysema, asthma, rhinitis, eczema or allergy diagnosed by doctor	-	Neale B	UKBB	European	2017	0.006308	0.001149	4.002e-08	+	336782	228530	108252	1	risk diff
rs3791679	rs3791679	chr2:56096892	chr2:55869757	G	A	Optic cup area	EFO_0006940	Springelkamp H	28073927	Mixed	2017	0.013	0.002385	5e-08	+	-	-	-	-	unit decrease
rs1443537	rs1443537	chr4:82150880	chr4:81229726	C	A	Overall health rating	-	Neale B	UKBB	European	2017	-0.01238	0.002028	1.013e-09	-	336020	0	336020	1	-
rs143384	rs143384	chr20:34025756	chr20:35437976	G	A	Pain type experienced in last month: knee pain	EFO_0003843	Neale B	UKBB	European	2017	-0.008818	0.001016	3.979e-18	-	336650	71561	265089	1	risk diff
rs823094	rs823094	chr1:205689807	chr1:205720679	G	T	Peak expiratory flow	EFO_0009718	Neale B	UKBB	European	2017	-0.01483	0.002192	1.298e-11	-	307638	0	307638	1	IVNT
rs71385734	rs71385734	chr16:2160503	chr16:2110502	G	T	Peak expiratory flow	EFO_0009718	Neale B	UKBB	European	2017	-0.0163	0.002899	1.879e-08	-	307638	0	307638	1	IVNT
rs3791679	rs3791679	chr2:56096892	chr2:55869757	G	A	Peak expiratory flow	EFO_0009718	Neale B	UKBB	European	2017	-0.01437	0.002585	2.739e-08	-	307638	0	307638	1	IVNT
rs143384	rs143384	chr20:34025756	chr20:35437976	G	A	Peak expiratory flow	EFO_0009718	Neale B	UKBB	European	2017	0.01982	0.0022	2.044e-19	+	307638	0	307638	1	IVNT
rs2131354	rs2131354	chr4:145599908	chr4:144678756	G	A	Peak expiratory flow	EFO_0009718	Neale B	UKBB	European	2017	-0.01425	0.002168	4.884e-11	-	307638	0	307638	1	IVNT
rs6537315	rs6537315	chr4:145724712	chr4:144803560	A	G	Peak expiratory flow	EFO_0009718	Neale B	UKBB	European	2017	-0.01907	0.00218	2.228e-18	-	307638	0	307638	1	IVNT
rs6817306	rs6817306	chr4:17868058	chr4:17866435	C	T	Peak expiratory flow	EFO_0009718	Neale B	UKBB	European	2017	-0.01921	0.003085	4.765e-10	-	307638	0	307638	1	IVNT
rs28406193	rs28406193	chr12:123891865	chr12:123407318	G	T	Platelet count	EFO_0004586	Astle W	27863252	European	2016	0.03066	0.004525	1.245e-11	+	173480	0	173480	2	IVNT
rs28481863	rs28481863	chr12:123902361	chr12:123417814	A	G	Platelet count	EFO_0004586	Astle W	27863252	European	2016	0.02955	0.004627	1.71e-10	+	173480	0	173480	2	IVNT
rs7238093	rs7238093	chr18:20728158	chr18:23148194	A	T	Platelet count	EFO_0004586	Astle W	27863252	European	2016	0.02687	0.004457	1.644e-09	+	173480	0	173480	2	IVNT
rs7244464	rs7244464	chr18:20729714	chr18:23149750	A	C	Platelet count	EFO_0004586	Astle W	27863252	European	2016	0.02694	0.004438	1.274e-09	+	173480	0	173480	2	IVNT
rs2814994	rs2814994	chr6:34620153	chr6:34652376	A	T	Platelet count	EFO_0004586	Astle W	27863252	European	2016	-0.03699	0.005237	1.63e-12	-	173480	0	173480	2	IVNT
rs7238093	rs7238093	chr18:20728158	chr18:23148194	A	T	Platelet distribution width	EFO_0004586	Astle W	27863252	European	2016	-0.02652	0.004392	1.568e-09	-	173480	0	173480	2	IVNT
rs7244464	rs7244464	chr18:20729714	chr18:23149750	A	C	Platelet distribution width	EFO_0004586	Astle W	27863252	European	2016	-0.02564	0.004374	4.539e-09	-	173480	0	173480	2	IVNT
rs28406193	rs28406193	chr12:123891865	chr12:123407318	G	T	Plateletcrit	EFO_0004586	Astle W	27863252	European	2016	0.02876	0.004542	2.43e-10	+	173480	0	173480	2	IVNT
rs28481863	rs28481863	chr12:123902361	chr12:123417814	A	G	Plateletcrit	EFO_0004586	Astle W	27863252	European	2016	0.02702	0.004645	5.974e-09	+	173480	0	173480	2	IVNT
rs2814994	rs2814994	chr6:34620153	chr6:34652376	A	T	Plateletcrit	EFO_0004586	Astle W	27863252	European	2016	-0.03774	0.005252	6.677e-13	-	173480	0	173480	2	IVNT
rs6763927	rs6763927	chr3:141140366	chr3:141421524	A	T	Pulse rate	EFO_0004326	Neale B	UKBB	European	2017	-0.02037	0.002528	7.913e-16	-	317756	0	317756	1	IVNT
rs7623981	rs7623981	chr3:172135334	chr3:172417544	C	T	Pulse rate	EFO_0004326	Neale B	UKBB	European	2017	0.01672	0.002529	3.798e-11	+	317756	0	317756	1	IVNT
rs2814994	rs2814994	chr6:34620153	chr6:34652376	A	T	Pulse rate	EFO_0004326	Neale B	UKBB	European	2017	-0.02213	0.00361	8.868e-10	-	317756	0	317756	1	IVNT
rs28406193	rs28406193	chr12:123891865	chr12:123407318	G	T	Qualifications: A levels or as levels or equivalent	EFO_0004784	Neale B	UKBB	European	2017	-0.008982	0.001356	3.486e-11	-	334070	91710	242360	1	risk diff
rs28481863	rs28481863	chr12:123902361	chr12:123417814	A	G	Qualifications: A levels or as levels or equivalent	EFO_0004784	Neale B	UKBB	European	2017	-0.008621	0.001386	5.033e-10	-	334070	91710	242360	1	risk diff
rs28406193	rs28406193	chr12:123891865	chr12:123407318	G	T	Qualifications: college or university degree	EFO_0004784	Neale B	UKBB	European	2017	-0.00804	0.001415	1.316e-08	-	334070	106305	227765	1	risk diff
rs28481863	rs28481863	chr12:123902361	chr12:123417814	A	G	Qualifications: college or university degree	EFO_0004784	Neale B	UKBB	European	2017	-0.007899	0.001446	4.742e-08	-	334070	106305	227765	1	risk diff
rs28406193	rs28406193	chr12:123891865	chr12:123407318	G	T	Qualifications: none	EFO_0004784	Neale B	UKBB	European	2017	0.007466	0.001147	7.519e-11	+	334070	57567	276503	1	risk diff
rs28481863	rs28481863	chr12:123902361	chr12:123417814	A	G	Qualifications: none	EFO_0004784	Neale B	UKBB	European	2017	0.007986	0.001173	9.801e-12	+	334070	57567	276503	1	risk diff
rs28406193	rs28406193	chr12:123891865	chr12:123407318	G	T	Qualifications: O levels or GCSEs or equivalent	EFO_0004784	Neale B	UKBB	European	2017	-0.00893	0.001513	3.629e-09	-	334070	159730	174340	1	risk diff
rs28481863	rs28481863	chr12:123902361	chr12:123417814	A	G	Qualifications: O levels or GCSEs or equivalent	EFO_0004784	Neale B	UKBB	European	2017	-0.008684	0.001548	2.011e-08	-	334070	159730	174340	1	risk diff
rs6763927	rs6763927	chr3:141140366	chr3:141421524	A	T	Red blood cell count	EFO_0004586	Astle W	27863252	European	2016	-0.03281	0.003604	8.893e-20	-	173480	0	173480	2	IVNT
rs7766336	rs7766336	chr6:105388405	chr6:104940530	G	T	Relative age of first facial hair	EFO_0007822	Neale B	UKBB	European	2017	-0.02088	0.001694	6.486e-35	-	151113	0	151113	1	-
rs314263	rs314263	chr6:105392745	chr6:104944870	C	T	Relative age of first facial hair	EFO_0007822	Neale B	UKBB	European	2017	0.02084	0.001694	8.904e-35	+	151113	0	151113	1	-
rs2181193	rs2181193	chr6:105442327	chr6:104994452	A	T	Relative age of first facial hair	EFO_0007822	Neale B	UKBB	European	2017	-0.01935	0.001677	8.47e-31	-	151113	0	151113	1	-
rs7766336	rs7766336	chr6:105388405	chr6:104940530	G	T	Relative age voice broke	EFO_0007888	Neale B	UKBB	European	2017	-0.01498	0.001264	2.181e-32	-	144645	0	144645	1	-
rs314263	rs314263	chr6:105392745	chr6:104944870	C	T	Relative age voice broke	EFO_0007888	Neale B	UKBB	European	2017	0.01495	0.001264	2.815e-32	+	144645	0	144645	1	-
rs2181193	rs2181193	chr6:105442327	chr6:104994452	A	T	Relative age voice broke	EFO_0007888	Neale B	UKBB	European	2017	-0.0148	0.001251	2.882e-32	-	144645	0	144645	1	-
rs6763927	rs6763927	chr3:141140366	chr3:141421524	A	T	Self-reported enlarged prostate	-	Neale B	UKBB	European	2017	-0.001555	0.0002835	4.165e-08	-	337159	4609	332550	1	risk diff
rs67807996	rs67807996	chr1:149995265	chr1:150023307	A	G	Sitting height	EFO_0004339	Neale B	UKBB	European	2017	0.02142	0.001978	2.627e-27	+	336172	0	336172	1	IVNT
rs823094	rs823094	chr1:205689807	chr1:205720679	G	T	Sitting height	EFO_0004339	Neale B	UKBB	European	2017	-0.0178	0.001903	8.612e-21	-	336172	0	336172	1	IVNT
rs2724648	rs2724648	chr12:11858191	chr12:11705257	T	C	Sitting height	EFO_0004339	Neale B	UKBB	European	2017	-0.01508	0.001958	1.334e-14	-	336172	0	336172	1	IVNT
rs28406193	rs28406193	chr12:123891865	chr12:123407318	G	T	Sitting height	EFO_0004339	Neale B	UKBB	European	2017	-0.03335	0.002332	2.236e-46	-	336172	0	336172	1	IVNT
rs28481863	rs28481863	chr12:123902361	chr12:123417814	A	G	Sitting height	EFO_0004339	Neale B	UKBB	European	2017	-0.03382	0.002384	1.167e-45	-	336172	0	336172	1	IVNT
rs2364232	rs2364232	chr12:93994827	chr12:93601051	A	C	Sitting height	EFO_0004339	Neale B	UKBB	European	2017	-0.04401	0.002148	2.97e-93	-	336172	0	336172	1	IVNT
rs10520573	rs10520573	chr15:84591575	chr15:83922823	G	A	Sitting height	EFO_0004339	Neale B	UKBB	European	2017	0.02014	0.001883	1.13e-26	+	336172	0	336172	1	IVNT
rs71385734	rs71385734	chr16:2160503	chr16:2110502	G	T	Sitting height	EFO_0004339	Neale B	UKBB	European	2017	-0.02648	0.002518	7.269e-26	-	336172	0	336172	1	IVNT
rs7238093	rs7238093	chr18:20728158	chr18:23148194	A	T	Sitting height	EFO_0004339	Neale B	UKBB	European	2017	-0.02297	0.002289	1.077e-23	-	336172	0	336172	1	IVNT
rs7244464	rs7244464	chr18:20729714	chr18:23149750	A	C	Sitting height	EFO_0004339	Neale B	UKBB	European	2017	-0.02269	0.002278	2.314e-23	-	336172	0	336172	1	IVNT
rs8094261	rs8094261	chr18:20746728	chr18:23166764	C	G	Sitting height	EFO_0004339	Neale B	UKBB	European	2017	0.01948	0.002371	2.127e-16	+	336172	0	336172	1	IVNT
rs1346789	rs1346789	chr2:56092052	chr2:55864917	T	C	Sitting height	EFO_0004339	Neale B	UKBB	European	2017	0.02945	0.002326	1.006e-36	+	336172	0	336172	1	IVNT
rs3791679	rs3791679	chr2:56096892	chr2:55869757	G	A	Sitting height	EFO_0004339	Neale B	UKBB	European	2017	-0.03095	0.002245	3.186e-43	-	336172	0	336172	1	IVNT
rs143384	rs143384	chr20:34025756	chr20:35437976	G	A	Sitting height	EFO_0004339	Neale B	UKBB	European	2017	0.06465	0.001909	5.827e-251	+	336172	0	336172	1	IVNT
rs6763927	rs6763927	chr3:141140366	chr3:141421524	A	T	Sitting height	EFO_0004339	Neale B	UKBB	European	2017	-0.04649	0.001894	6.789e-133	-	336172	0	336172	1	IVNT
rs7623981	rs7623981	chr3:172135334	chr3:172417544	C	T	Sitting height	EFO_0004339	Neale B	UKBB	European	2017	-0.01565	0.001898	1.639e-16	-	336172	0	336172	1	IVNT
rs2131354	rs2131354	chr4:145599908	chr4:144678756	G	A	Sitting height	EFO_0004339	Neale B	UKBB	European	2017	-0.04059	0.001882	3.934e-103	-	336172	0	336172	1	IVNT
rs6537315	rs6537315	chr4:145724712	chr4:144803560	A	G	Sitting height	EFO_0004339	Neale B	UKBB	European	2017	-0.0316	0.001892	1.306e-62	-	336172	0	336172	1	IVNT
rs6817306	rs6817306	chr4:17868058	chr4:17866435	C	T	Sitting height	EFO_0004339	Neale B	UKBB	European	2017	-0.04712	0.002679	3.371e-69	-	336172	0	336172	1	IVNT
rs1443537	rs1443537	chr4:82150880	chr4:81229726	C	A	Sitting height	EFO_0004339	Neale B	UKBB	European	2017	-0.0226	0.002158	1.116e-25	-	336172	0	336172	1	IVNT
rs1712374	rs1712374	chr4:82154710	chr4:81233556	T	C	Sitting height	EFO_0004339	Neale B	UKBB	European	2017	-0.02587	0.002038	6.7e-37	-	336172	0	336172	1	IVNT
rs409012	rs409012	chr5:77375625	chr5:78079801	A	C	Sitting height	EFO_0004339	Neale B	UKBB	European	2017	0.02702	0.002179	2.678e-35	+	336172	0	336172	1	IVNT
rs7766336	rs7766336	chr6:105388405	chr6:104940530	G	T	Sitting height	EFO_0004339	Neale B	UKBB	European	2017	-0.01404	0.00201	2.8e-12	-	336172	0	336172	1	IVNT
rs314263	rs314263	chr6:105392745	chr6:104944870	C	T	Sitting height	EFO_0004339	Neale B	UKBB	European	2017	0.01404	0.00201	2.789e-12	+	336172	0	336172	1	IVNT
rs2181193	rs2181193	chr6:105442327	chr6:104994452	A	T	Sitting height	EFO_0004339	Neale B	UKBB	European	2017	-0.01182	0.001989	2.809e-09	-	336172	0	336172	1	IVNT
rs1361107	rs1361107	chr6:126767511	chr6:126446365	A	C	Sitting height	EFO_0004339	Neale B	UKBB	European	2017	-0.03428	0.001883	5.514e-74	-	336172	0	336172	1	IVNT
rs1159619	rs1159619	chr6:126801144	chr6:126479998	A	C	Sitting height	EFO_0004339	Neale B	UKBB	European	2017	0.03421	0.001886	1.622e-73	+	336172	0	336172	1	IVNT
rs9496369	rs9496369	chr6:142724918	chr6:142403781	C	T	Sitting height	EFO_0004339	Neale B	UKBB	European	2017	0.05636	0.002082	3.969e-161	+	336172	0	336172	1	IVNT
rs7770386	rs7770386	chr6:142775657	chr6:142454520	C	T	Sitting height	EFO_0004339	Neale B	UKBB	European	2017	0.0556	0.002079	1.915e-157	+	336172	0	336172	1	IVNT
rs2814994	rs2814994	chr6:34620153	chr6:34652376	A	T	Sitting height	EFO_0004339	Neale B	UKBB	European	2017	0.03493	0.002707	4.481e-38	+	336172	0	336172	1	IVNT
rs10103623	rs10103623	chr8:78106082	chr8:77193846	A	G	Sitting height	EFO_0004339	Neale B	UKBB	European	2017	-0.03221	0.002078	3.363e-54	-	336172	0	336172	1	IVNT
rs2167733	rs2167733	chr8:78110734	chr8:77198498	G	A	Sitting height	EFO_0004339	Neale B	UKBB	European	2017	-0.03223	0.002081	4.66e-54	-	336172	0	336172	1	IVNT
rs314263	rs314263	chr6:105392745	chr6:104944870	C	T	Standardized difference in height between age 14 years and adult	-	EGGC	23449627	European	2013	0.07128	0.0232	6.276e-09	+	4282	0	4282	5	SDS
rs314263	rs314263	chr6:105392745	chr6:104944870	C	T	Tanner stage	-	EGGC	24770850	European	2014	-0.07832	0.01402	2.95e-08	-	9916	0	9916	7	-
rs67807996	rs67807996	chr1:149995265	chr1:150023307	A	G	Trunk fat mass	EFO_0005409	Neale B	UKBB	European	2017	0.03052	0.002576	2.2e-32	+	331093	0	331093	1	IVNT
rs10520573	rs10520573	chr15:84591575	chr15:83922823	G	A	Trunk fat mass	EFO_0005409	Neale B	UKBB	European	2017	0.02492	0.002454	3.063e-24	+	331093	0	331093	1	IVNT
rs71385734	rs71385734	chr16:2160503	chr16:2110502	G	T	Trunk fat mass	EFO_0005409	Neale B	UKBB	European	2017	-0.02398	0.003279	2.603e-13	-	331093	0	331093	1	IVNT
rs7238093	rs7238093	chr18:20728158	chr18:23148194	A	T	Trunk fat mass	EFO_0005409	Neale B	UKBB	European	2017	-0.01998	0.002981	2.039e-11	-	331093	0	331093	1	IVNT
rs7244464	rs7244464	chr18:20729714	chr18:23149750	A	C	Trunk fat mass	EFO_0005409	Neale B	UKBB	European	2017	-0.02008	0.002967	1.311e-11	-	331093	0	331093	1	IVNT
rs8094261	rs8094261	chr18:20746728	chr18:23166764	C	G	Trunk fat mass	EFO_0005409	Neale B	UKBB	European	2017	0.01787	0.003088	7.123e-09	+	331093	0	331093	1	IVNT
rs1346789	rs1346789	chr2:56092052	chr2:55864917	T	C	Trunk fat mass	EFO_0005409	Neale B	UKBB	European	2017	0.02071	0.003031	8.322e-12	+	331093	0	331093	1	IVNT
rs3791679	rs3791679	chr2:56096892	chr2:55869757	G	A	Trunk fat mass	EFO_0005409	Neale B	UKBB	European	2017	-0.02274	0.002925	7.55e-15	-	331093	0	331093	1	IVNT
rs143384	rs143384	chr20:34025756	chr20:35437976	G	A	Trunk fat mass	EFO_0005409	Neale B	UKBB	European	2017	0.01899	0.002491	2.424e-14	+	331093	0	331093	1	IVNT
rs6763927	rs6763927	chr3:141140366	chr3:141421524	A	T	Trunk fat mass	EFO_0005409	Neale B	UKBB	European	2017	-0.02794	0.00247	1.153e-29	-	331093	0	331093	1	IVNT
rs2131354	rs2131354	chr4:145599908	chr4:144678756	G	A	Trunk fat mass	EFO_0005409	Neale B	UKBB	European	2017	-0.01613	0.002452	4.755e-11	-	331093	0	331093	1	IVNT
rs6537315	rs6537315	chr4:145724712	chr4:144803560	A	G	Trunk fat mass	EFO_0005409	Neale B	UKBB	European	2017	-0.01363	0.002465	3.18e-08	-	331093	0	331093	1	IVNT
rs1443537	rs1443537	chr4:82150880	chr4:81229726	C	A	Trunk fat mass	EFO_0005409	Neale B	UKBB	European	2017	-0.01721	0.00281	9.098e-10	-	331093	0	331093	1	IVNT
rs1712374	rs1712374	chr4:82154710	chr4:81233556	T	C	Trunk fat mass	EFO_0005409	Neale B	UKBB	European	2017	-0.01669	0.002654	3.262e-10	-	331093	0	331093	1	IVNT
rs409012	rs409012	chr5:77375625	chr5:78079801	A	C	Trunk fat mass	EFO_0005409	Neale B	UKBB	European	2017	0.02116	0.002838	8.92e-14	+	331093	0	331093	1	IVNT
rs7766336	rs7766336	chr6:105388405	chr6:104940530	G	T	Trunk fat mass	EFO_0005409	Neale B	UKBB	European	2017	-0.0169	0.002618	1.082e-10	-	331093	0	331093	1	IVNT
rs314263	rs314263	chr6:105392745	chr6:104944870	C	T	Trunk fat mass	EFO_0005409	Neale B	UKBB	European	2017	0.01692	0.002618	1.025e-10	+	331093	0	331093	1	IVNT
rs2181193	rs2181193	chr6:105442327	chr6:104994452	A	T	Trunk fat mass	EFO_0005409	Neale B	UKBB	European	2017	-0.01505	0.002591	6.246e-09	-	331093	0	331093	1	IVNT
rs9496369	rs9496369	chr6:142724918	chr6:142403781	C	T	Trunk fat mass	EFO_0005409	Neale B	UKBB	European	2017	0.01728	0.002715	1.932e-10	+	331093	0	331093	1	IVNT
rs7770386	rs7770386	chr6:142775657	chr6:142454520	C	T	Trunk fat mass	EFO_0005409	Neale B	UKBB	European	2017	0.01713	0.00271	2.602e-10	+	331093	0	331093	1	IVNT
rs2814994	rs2814994	chr6:34620153	chr6:34652376	A	T	Trunk fat mass	EFO_0005409	Neale B	UKBB	European	2017	0.05076	0.003529	6.64e-47	+	331093	0	331093	1	IVNT
rs67807996	rs67807996	chr1:149995265	chr1:150023307	A	G	Trunk fat percentage	-	Neale B	UKBB	European	2017	0.02781	0.002351	2.931e-32	+	331113	0	331113	1	IVNT
rs10520573	rs10520573	chr15:84591575	chr15:83922823	G	A	Trunk fat percentage	-	Neale B	UKBB	European	2017	0.0237	0.00224	3.748e-26	+	331113	0	331113	1	IVNT
rs3791679	rs3791679	chr2:56096892	chr2:55869757	G	A	Trunk fat percentage	-	Neale B	UKBB	European	2017	-0.0154	0.00267	8.071e-09	-	331113	0	331113	1	IVNT
rs6763927	rs6763927	chr3:141140366	chr3:141421524	A	T	Trunk fat percentage	-	Neale B	UKBB	European	2017	-0.0153	0.002255	1.138e-11	-	331113	0	331113	1	IVNT
rs409012	rs409012	chr5:77375625	chr5:78079801	A	C	Trunk fat percentage	-	Neale B	UKBB	European	2017	0.01423	0.002591	3.981e-08	+	331113	0	331113	1	IVNT
rs1361107	rs1361107	chr6:126767511	chr6:126446365	A	C	Trunk fat percentage	-	Neale B	UKBB	European	2017	0.01285	0.00224	9.758e-09	+	331113	0	331113	1	IVNT
rs1159619	rs1159619	chr6:126801144	chr6:126479998	A	C	Trunk fat percentage	-	Neale B	UKBB	European	2017	-0.01262	0.002243	1.841e-08	-	331113	0	331113	1	IVNT
rs2814994	rs2814994	chr6:34620153	chr6:34652376	A	T	Trunk fat percentage	-	Neale B	UKBB	European	2017	0.03462	0.003222	6.392e-27	+	331113	0	331113	1	IVNT
rs823094	rs823094	chr1:205689807	chr1:205720679	G	T	Trunk fat-free mass	-	Neale B	UKBB	European	2017	-0.01177	0.001551	3.208e-14	-	331030	0	331030	1	IVNT
rs2724648	rs2724648	chr12:11858191	chr12:11705257	T	C	Trunk fat-free mass	-	Neale B	UKBB	European	2017	-0.01508	0.001596	3.351e-21	-	331030	0	331030	1	IVNT
rs28406193	rs28406193	chr12:123891865	chr12:123407318	G	T	Trunk fat-free mass	-	Neale B	UKBB	European	2017	-0.01537	0.0019	6.07e-16	-	331030	0	331030	1	IVNT
rs28481863	rs28481863	chr12:123902361	chr12:123417814	A	G	Trunk fat-free mass	-	Neale B	UKBB	European	2017	-0.01612	0.001943	1.084e-16	-	331030	0	331030	1	IVNT
rs2364232	rs2364232	chr12:93994827	chr12:93601051	A	C	Trunk fat-free mass	-	Neale B	UKBB	European	2017	-0.02537	0.001751	1.533e-47	-	331030	0	331030	1	IVNT
rs71385734	rs71385734	chr16:2160503	chr16:2110502	G	T	Trunk fat-free mass	-	Neale B	UKBB	European	2017	-0.02395	0.002051	1.686e-31	-	331030	0	331030	1	IVNT
rs7238093	rs7238093	chr18:20728158	chr18:23148194	A	T	Trunk fat-free mass	-	Neale B	UKBB	European	2017	-0.03001	0.001865	2.913e-58	-	331030	0	331030	1	IVNT
rs7244464	rs7244464	chr18:20729714	chr18:23149750	A	C	Trunk fat-free mass	-	Neale B	UKBB	European	2017	-0.02992	0.001856	1.806e-58	-	331030	0	331030	1	IVNT
rs8094261	rs8094261	chr18:20746728	chr18:23166764	C	G	Trunk fat-free mass	-	Neale B	UKBB	European	2017	0.02611	0.001931	1.245e-41	+	331030	0	331030	1	IVNT
rs1346789	rs1346789	chr2:56092052	chr2:55864917	T	C	Trunk fat-free mass	-	Neale B	UKBB	European	2017	0.01735	0.001896	5.733e-20	+	331030	0	331030	1	IVNT
rs3791679	rs3791679	chr2:56096892	chr2:55869757	G	A	Trunk fat-free mass	-	Neale B	UKBB	European	2017	-0.01812	0.00183	4.034e-23	-	331030	0	331030	1	IVNT
rs143384	rs143384	chr20:34025756	chr20:35437976	G	A	Trunk fat-free mass	-	Neale B	UKBB	European	2017	0.03909	0.001557	5.159e-139	+	331030	0	331030	1	IVNT
rs6763927	rs6763927	chr3:141140366	chr3:141421524	A	T	Trunk fat-free mass	-	Neale B	UKBB	European	2017	-0.03052	0.001544	7.007e-87	-	331030	0	331030	1	IVNT
rs7623981	rs7623981	chr3:172135334	chr3:172417544	C	T	Trunk fat-free mass	-	Neale B	UKBB	European	2017	-0.01605	0.001546	3.036e-25	-	331030	0	331030	1	IVNT
rs2131354	rs2131354	chr4:145599908	chr4:144678756	G	A	Trunk fat-free mass	-	Neale B	UKBB	European	2017	-0.02117	0.001534	2.629e-43	-	331030	0	331030	1	IVNT
rs6537315	rs6537315	chr4:145724712	chr4:144803560	A	G	Trunk fat-free mass	-	Neale B	UKBB	European	2017	-0.02021	0.001542	3.045e-39	-	331030	0	331030	1	IVNT
rs6817306	rs6817306	chr4:17868058	chr4:17866435	C	T	Trunk fat-free mass	-	Neale B	UKBB	European	2017	-0.03398	0.002183	1.329e-54	-	331030	0	331030	1	IVNT
rs1443537	rs1443537	chr4:82150880	chr4:81229726	C	A	Trunk fat-free mass	-	Neale B	UKBB	European	2017	-0.01094	0.001758	4.901e-10	-	331030	0	331030	1	IVNT
rs1712374	rs1712374	chr4:82154710	chr4:81233556	T	C	Trunk fat-free mass	-	Neale B	UKBB	European	2017	-0.01172	0.001661	1.713e-12	-	331030	0	331030	1	IVNT
rs409012	rs409012	chr5:77375625	chr5:78079801	A	C	Trunk fat-free mass	-	Neale B	UKBB	European	2017	0.01574	0.001776	7.649e-19	+	331030	0	331030	1	IVNT
rs7766336	rs7766336	chr6:105388405	chr6:104940530	G	T	Trunk fat-free mass	-	Neale B	UKBB	European	2017	-0.01024	0.001638	4.111e-10	-	331030	0	331030	1	IVNT
rs314263	rs314263	chr6:105392745	chr6:104944870	C	T	Trunk fat-free mass	-	Neale B	UKBB	European	2017	0.01025	0.001638	3.923e-10	+	331030	0	331030	1	IVNT
rs2181193	rs2181193	chr6:105442327	chr6:104994452	A	T	Trunk fat-free mass	-	Neale B	UKBB	European	2017	-0.008905	0.001621	3.953e-08	-	331030	0	331030	1	IVNT
rs1361107	rs1361107	chr6:126767511	chr6:126446365	A	C	Trunk fat-free mass	-	Neale B	UKBB	European	2017	-0.02472	0.001535	2.326e-58	-	331030	0	331030	1	IVNT
rs1159619	rs1159619	chr6:126801144	chr6:126479998	A	C	Trunk fat-free mass	-	Neale B	UKBB	European	2017	0.02479	0.001537	1.65e-58	+	331030	0	331030	1	IVNT
rs9496369	rs9496369	chr6:142724918	chr6:142403781	C	T	Trunk fat-free mass	-	Neale B	UKBB	European	2017	0.01803	0.001698	2.562e-26	+	331030	0	331030	1	IVNT
rs7770386	rs7770386	chr6:142775657	chr6:142454520	C	T	Trunk fat-free mass	-	Neale B	UKBB	European	2017	0.01748	0.001695	6.326e-25	+	331030	0	331030	1	IVNT
rs2814994	rs2814994	chr6:34620153	chr6:34652376	A	T	Trunk fat-free mass	-	Neale B	UKBB	European	2017	0.03716	0.002208	1.436e-63	+	331030	0	331030	1	IVNT
rs10103623	rs10103623	chr8:78106082	chr8:77193846	A	G	Trunk fat-free mass	-	Neale B	UKBB	European	2017	-0.02194	0.001693	2.153e-38	-	331030	0	331030	1	IVNT
rs2167733	rs2167733	chr8:78110734	chr8:77198498	G	A	Trunk fat-free mass	-	Neale B	UKBB	European	2017	-0.02188	0.001696	4.77e-38	-	331030	0	331030	1	IVNT
rs823094	rs823094	chr1:205689807	chr1:205720679	G	T	Trunk predicted mass	-	Neale B	UKBB	European	2017	-0.01189	0.001546	1.427e-14	-	330995	0	330995	1	IVNT
rs2724648	rs2724648	chr12:11858191	chr12:11705257	T	C	Trunk predicted mass	-	Neale B	UKBB	European	2017	-0.01495	0.00159	5.635e-21	-	330995	0	330995	1	IVNT
rs28406193	rs28406193	chr12:123891865	chr12:123407318	G	T	Trunk predicted mass	-	Neale B	UKBB	European	2017	-0.01535	0.001894	5.467e-16	-	330995	0	330995	1	IVNT
rs28481863	rs28481863	chr12:123902361	chr12:123417814	A	G	Trunk predicted mass	-	Neale B	UKBB	European	2017	-0.01609	0.001937	9.932e-17	-	330995	0	330995	1	IVNT
rs2364232	rs2364232	chr12:93994827	chr12:93601051	A	C	Trunk predicted mass	-	Neale B	UKBB	European	2017	-0.02534	0.001745	9.607e-48	-	330995	0	330995	1	IVNT
rs71385734	rs71385734	chr16:2160503	chr16:2110502	G	T	Trunk predicted mass	-	Neale B	UKBB	European	2017	-0.02372	0.002044	4.12e-31	-	330995	0	330995	1	IVNT
rs7238093	rs7238093	chr18:20728158	chr18:23148194	A	T	Trunk predicted mass	-	Neale B	UKBB	European	2017	-0.02966	0.001858	2.606e-57	-	330995	0	330995	1	IVNT
rs7244464	rs7244464	chr18:20729714	chr18:23149750	A	C	Trunk predicted mass	-	Neale B	UKBB	European	2017	-0.02961	0.00185	1.18e-57	-	330995	0	330995	1	IVNT
rs8094261	rs8094261	chr18:20746728	chr18:23166764	C	G	Trunk predicted mass	-	Neale B	UKBB	European	2017	0.0258	0.001925	5.926e-41	+	330995	0	330995	1	IVNT
rs1346789	rs1346789	chr2:56092052	chr2:55864917	T	C	Trunk predicted mass	-	Neale B	UKBB	European	2017	0.01722	0.00189	7.904e-20	+	330995	0	330995	1	IVNT
rs3791679	rs3791679	chr2:56096892	chr2:55869757	G	A	Trunk predicted mass	-	Neale B	UKBB	European	2017	-0.01798	0.001824	6.124e-23	-	330995	0	330995	1	IVNT
rs143384	rs143384	chr20:34025756	chr20:35437976	G	A	Trunk predicted mass	-	Neale B	UKBB	European	2017	0.03889	0.001552	1.86e-138	+	330995	0	330995	1	IVNT
rs6763927	rs6763927	chr3:141140366	chr3:141421524	A	T	Trunk predicted mass	-	Neale B	UKBB	European	2017	-0.03042	0.001539	7.461e-87	-	330995	0	330995	1	IVNT
rs7623981	rs7623981	chr3:172135334	chr3:172417544	C	T	Trunk predicted mass	-	Neale B	UKBB	European	2017	-0.01587	0.001541	7.305e-25	-	330995	0	330995	1	IVNT
rs2131354	rs2131354	chr4:145599908	chr4:144678756	G	A	Trunk predicted mass	-	Neale B	UKBB	European	2017	-0.02098	0.001529	7.32e-43	-	330995	0	330995	1	IVNT
rs6537315	rs6537315	chr4:145724712	chr4:144803560	A	G	Trunk predicted mass	-	Neale B	UKBB	European	2017	-0.02009	0.001537	4.805e-39	-	330995	0	330995	1	IVNT
rs6817306	rs6817306	chr4:17868058	chr4:17866435	C	T	Trunk predicted mass	-	Neale B	UKBB	European	2017	-0.03404	0.002176	3.88e-55	-	330995	0	330995	1	IVNT
rs1443537	rs1443537	chr4:82150880	chr4:81229726	C	A	Trunk predicted mass	-	Neale B	UKBB	European	2017	-0.01087	0.001752	5.53e-10	-	330995	0	330995	1	IVNT
rs1712374	rs1712374	chr4:82154710	chr4:81233556	T	C	Trunk predicted mass	-	Neale B	UKBB	European	2017	-0.01164	0.001655	2.002e-12	-	330995	0	330995	1	IVNT
rs409012	rs409012	chr5:77375625	chr5:78079801	A	C	Trunk predicted mass	-	Neale B	UKBB	European	2017	0.01559	0.00177	1.274e-18	+	330995	0	330995	1	IVNT
rs7766336	rs7766336	chr6:105388405	chr6:104940530	G	T	Trunk predicted mass	-	Neale B	UKBB	European	2017	-0.01032	0.001632	2.561e-10	-	330995	0	330995	1	IVNT
rs314263	rs314263	chr6:105392745	chr6:104944870	C	T	Trunk predicted mass	-	Neale B	UKBB	European	2017	0.01033	0.001632	2.463e-10	+	330995	0	330995	1	IVNT
rs2181193	rs2181193	chr6:105442327	chr6:104994452	A	T	Trunk predicted mass	-	Neale B	UKBB	European	2017	-0.009008	0.001616	2.481e-08	-	330995	0	330995	1	IVNT
rs1361107	rs1361107	chr6:126767511	chr6:126446365	A	C	Trunk predicted mass	-	Neale B	UKBB	European	2017	-0.02447	0.00153	1.41e-57	-	330995	0	330995	1	IVNT
rs1159619	rs1159619	chr6:126801144	chr6:126479998	A	C	Trunk predicted mass	-	Neale B	UKBB	European	2017	0.02453	0.001532	1.07e-57	+	330995	0	330995	1	IVNT
rs9496369	rs9496369	chr6:142724918	chr6:142403781	C	T	Trunk predicted mass	-	Neale B	UKBB	European	2017	0.01803	0.001693	1.7e-26	+	330995	0	330995	1	IVNT
rs7770386	rs7770386	chr6:142775657	chr6:142454520	C	T	Trunk predicted mass	-	Neale B	UKBB	European	2017	0.01749	0.001689	4.07e-25	+	330995	0	330995	1	IVNT
rs2814994	rs2814994	chr6:34620153	chr6:34652376	A	T	Trunk predicted mass	-	Neale B	UKBB	European	2017	0.03697	0.0022	2.419e-63	+	330995	0	330995	1	IVNT
rs10103623	rs10103623	chr8:78106082	chr8:77193846	A	G	Trunk predicted mass	-	Neale B	UKBB	European	2017	-0.02202	0.001688	6.772e-39	-	330995	0	330995	1	IVNT
rs2167733	rs2167733	chr8:78110734	chr8:77198498	G	A	Trunk predicted mass	-	Neale B	UKBB	European	2017	-0.02196	0.001691	1.515e-38	-	330995	0	330995	1	IVNT
rs1361107	rs1361107	chr6:126767511	chr6:126446365	A	C	Type II diabetes	EFO_0001360	DIAGRAM	28566273	European	2017	-0.066	0.012	4.8e-08	-	159208	26676	132532	18	log OR
rs1159619	rs1159619	chr6:126801144	chr6:126479998	A	C	Type II diabetes	EFO_0001360	DIAGRAM	28566273	European	2017	0.066	0.012	4e-08	+	159208	26676	132532	18	log OR
rs1361107	rs1361107	chr6:126767511	chr6:126446365	A	C	Type II diabetes adjusted for BMI	EFO_0001360	DIAGRAM	28566273	European	2017	-0.081	0.014	1.6e-08	-	159208	26676	132532	18	log OR
rs1159619	rs1159619	chr6:126801144	chr6:126479998	A	C	Type II diabetes adjusted for BMI	EFO_0001360	DIAGRAM	28566273	European	2017	0.082	0.014	9.4e-09	+	159208	26676	132532	18	log OR
rs6817306	rs6817306	chr4:17868058	chr4:17866435	C	T	Vascular or heart problems diagnosed by doctor: none of the above	-	Neale B	UKBB	European	2017	-0.008711	0.001584	3.809e-08	-	336683	236530	100153	1	risk diff
rs10520573	rs10520573	chr15:84591575	chr15:83922823	G	A	Waist circumeference adjusted for physical activity in males	EFO_0007789	GIANT	28448500	Mixed	2017	0.0427	0.0052	2.39e-16	+	80169	0	80169	50	IVNT
rs8094261	rs8094261	chr18:20746728	chr18:23166764	C	G	Waist circumeference adjusted for physical activity in males	EFO_0007789	GIANT	28448500	Mixed	2017	0.0394	0.0065	1.75e-09	+	80580	0	80580	50	IVNT
rs1346789	rs1346789	chr2:56092052	chr2:55864917	T	C	Waist circumeference adjusted for physical activity in males	EFO_0007789	GIANT	28448500	Mixed	2017	0.0404	0.0068	2.47e-09	+	67942	0	67942	50	IVNT
rs3791679	rs3791679	chr2:56096892	chr2:55869757	G	A	Waist circumeference adjusted for physical activity in males	EFO_0007789	GIANT	28448500	Mixed	2017	-0.0481	0.0063	2.47e-14	-	75885	0	75885	50	IVNT
rs6763927	rs6763927	chr3:141140366	chr3:141421524	A	T	Waist circumeference adjusted for physical activity in males	EFO_0007789	GIANT	28448500	Mixed	2017	-0.0346	0.0062	2.06e-08	-	61301	0	61301	50	IVNT
rs314263	rs314263	chr6:105392745	chr6:104944870	C	T	Waist circumeference adjusted for physical activity in males	EFO_0007789	GIANT	28448500	Mixed	2017	0.0389	0.0066	3.77e-09	+	59302	0	59302	50	IVNT
rs10520573	rs10520573	chr15:84591575	chr15:83922823	G	A	Waist circumeference in physically active males	HP_0012041;HP_0000033	GIANT	28448500	Mixed	2017	0.0497	0.006	1.59e-16	+	58610	0	58610	50	IVNT
rs1346789	rs1346789	chr2:56092052	chr2:55864917	T	C	Waist circumeference in physically active males	HP_0012041;HP_0000033	GIANT	28448500	Mixed	2017	0.0424	0.0077	4.16e-08	+	49562	0	49562	50	IVNT
rs3791679	rs3791679	chr2:56096892	chr2:55869757	G	A	Waist circumeference in physically active males	HP_0012041;HP_0000033	GIANT	28448500	Mixed	2017	-0.0468	0.0072	8.23e-11	-	56136	0	56136	50	IVNT
rs314263	rs314263	chr6:105392745	chr6:104944870	C	T	Waist circumeference in physically active males	HP_0012041;HP_0000033	GIANT	28448500	Mixed	2017	0.0404	0.0073	3.72e-08	+	44497	0	44497	50	IVNT
rs71385734	rs71385734	chr16:2160503	chr16:2110502	G	T	Waist circumference	EFO_0004342	Neale B	UKBB	European	2017	-0.02417	0.002885	5.374e-17	-	336639	0	336639	1	IVNT
rs7238093	rs7238093	chr18:20728158	chr18:23148194	A	T	Waist circumference	EFO_0004342	Neale B	UKBB	European	2017	-0.01895	0.002623	5.038e-13	-	336639	0	336639	1	IVNT
rs7244464	rs7244464	chr18:20729714	chr18:23149750	A	C	Waist circumference	EFO_0004342	Neale B	UKBB	European	2017	-0.01901	0.002611	3.26e-13	-	336639	0	336639	1	IVNT
rs8094261	rs8094261	chr18:20746728	chr18:23166764	C	G	Waist circumference	EFO_0004342	Neale B	UKBB	European	2017	0.01704	0.002717	3.543e-10	+	336639	0	336639	1	IVNT
rs6763927	rs6763927	chr3:141140366	chr3:141421524	A	T	Waist circumference	EFO_0004342	Neale B	UKBB	European	2017	-0.01341	0.002172	6.736e-10	-	336639	0	336639	1	IVNT
rs2814994	rs2814994	chr6:34620153	chr6:34652376	A	T	Waist circumference	EFO_0004342	Neale B	UKBB	European	2017	0.03405	0.003102	5.003e-28	+	336639	0	336639	1	IVNT
rs10520573	rs10520573	chr15:84591575	chr15:83922823	G	A	Waist circumference adjusted for BMI	EFO_0004342	GIANT	25673412	Mixed	2015	0.035	0.0033	8.3e-26	+	241576	0	241576	109	IVNT
rs8094261	rs8094261	chr18:20746728	chr18:23166764	C	G	Waist circumference adjusted for BMI	EFO_0004342	GIANT	25673412	Mixed	2015	0.038	0.0041	3.1e-20	+	245538	0	245538	109	IVNT
rs1346789	rs1346789	chr2:56092052	chr2:55864917	T	C	Waist circumference adjusted for BMI	EFO_0004342	GIANT	25673412	Mixed	2015	0.031	0.0044	3e-12	+	188542	0	188542	109	IVNT
rs3791679	rs3791679	chr2:56096892	chr2:55869757	G	A	Waist circumference adjusted for BMI	EFO_0004342	GIANT	25673412	Mixed	2015	-0.036	0.0038	3.9e-21	-	243358	0	243358	109	IVNT
rs6763927	rs6763927	chr3:141140366	chr3:141421524	A	T	Waist circumference adjusted for BMI	EFO_0004342	GIANT	25673412	Mixed	2015	-0.026	0.0043	2.6e-09	-	153234	0	153234	109	IVNT
rs1443537	rs1443537	chr4:82150880	chr4:81229726	C	A	Waist circumference adjusted for BMI	EFO_0004342	GIANT	25673412	Mixed	2015	-0.026	0.0037	6.6e-12	-	243731	0	243731	109	IVNT
rs1712374	rs1712374	chr4:82154710	chr4:81233556	T	C	Waist circumference adjusted for BMI	EFO_0004342	GIANT	25673412	Mixed	2015	-0.022	0.0035	4.1e-10	-	241706	0	241706	109	IVNT
rs314263	rs314263	chr6:105392745	chr6:104944870	C	T	Waist circumference adjusted for BMI	EFO_0004342	GIANT	25673412	Mixed	2015	0.029	0.0045	1.3e-10	+	153460	0	153460	109	IVNT
rs3791679	rs3791679	chr2:56096892	chr2:55869757	G	A	Waist circumference adjusted for BMI adjusted for smoking behaviour	EFO_0004318;EFO_0007789	GIANT	28443625	European	2017	-0.0409	0.005814	2e-12	-	-	-	-	-	unit increase
rs3791679	rs3791679	chr2:56096892	chr2:55869757	G	A	Waist circumference adjusted for BMI adjusted for smoking behaviour	EFO_0004318;EFO_0007789	GIANT	28443625	European	2017	-0.0354	0.004364	5e-16	-	-	-	-	-	unit increase
rs3791679	rs3791679	chr2:56096892	chr2:55869757	G	A	Waist circumference adjusted for BMI in active individuals	EFO_0007789;EFO_0008002	GIANT	28448500	European	2017	-0.0333	0.004966	2e-11	-	-	-	-	-	cm increase
rs3791679	rs3791679	chr2:56096892	chr2:55869757	G	A	Waist circumference adjusted for BMI in active individuals	EFO_0007789;EFO_0008002	GIANT	28448500	European	2017	-0.0468	0.007199	8e-11	-	-	-	-	-	cm increase
rs3791679	rs3791679	chr2:56096892	chr2:55869757	G	A	Waist circumference adjusted for BMI in active individuals	EFO_0007789;EFO_0008002	GIANT	28448500	European	2017	-0.05	0.007346	1e-11	-	-	-	-	-	cm increase
rs3791679	rs3791679	chr2:56096892	chr2:55869757	G	A	Waist circumference adjusted for BMI in active individuals	EFO_0007789;EFO_0008002	GIANT	28448500	European	2017	-0.0364	0.005105	1e-12	-	-	-	-	-	cm increase
rs3791679	rs3791679	chr2:56096892	chr2:55869757	G	A	Waist circumference adjusted for BMI in non smokers	EFO_0007789	GIANT	28443625	European	2017	-0.0422	0.006888	9e-10	-	-	-	-	-	unit increase
rs3791679	rs3791679	chr2:56096892	chr2:55869757	G	A	Waist circumference adjusted for BMI in non smokers	EFO_0007789	GIANT	28443625	European	2017	-0.0344	0.00489	2e-12	-	-	-	-	-	unit increase
rs3791679	rs3791679	chr2:56096892	chr2:55869757	G	A	Waist circumference adjusted for BMI joint analysis main effects and physical activity interaction	EFO_0007789;EFO_0008002	GIANT	28448500	European	2017	NA	NA	9e-14	NA	-	-	-	-	-
rs3791679	rs3791679	chr2:56096892	chr2:55869757	G	A	Waist circumference adjusted for BMI joint analysis main effects and physical activity interaction	EFO_0007789;EFO_0008002	GIANT	28448500	European	2017	NA	NA	2e-14	NA	-	-	-	-	-
rs3791679	rs3791679	chr2:56096892	chr2:55869757	G	A	Waist circumference adjusted for BMI joint analysis main effects and smoking interaction	EFO_0004318;EFO_0007789	GIANT	28443625	European	2017	NA	NA	2e-17	NA	-	-	-	-	-
rs3791679	rs3791679	chr2:56096892	chr2:55869757	G	A	Waist circumference adjusted for BMI joint analysis main effects and smoking interaction	EFO_0004318;EFO_0007789	GIANT	28443625	European	2017	NA	NA	5e-12	NA	-	-	-	-	-
rs3791679	rs3791679	chr2:56096892	chr2:55869757	G	A	Waist circumference adjusted for body mass index	EFO_0007789	Wen W	26785701	East Asian	2016	-0.04042	0.006354	2e-10	-	-	-	-	-	unit increase
rs3791679	rs3791679	chr2:56096892	chr2:55869757	G	A	Waist circumference adjusted for body mass index	EFO_0007789	Wen W	26785701	East Asian	2016	-0.029	0.00385	5e-14	-	-	-	-	-	unit increase
rs3791679	rs3791679	chr2:56096892	chr2:55869757	G	A	Waist circumference adjusted for body mass index	EFO_0007789	Wen W	26785701	East Asian	2016	-0.0353	0.003916	2e-19	-	-	-	-	-	unit increase
rs3791679	rs3791679	chr2:56096892	chr2:55869757	G	A	Waist circumference adjusted for body mass index	EFO_0007789;EFO_0008002	GIANT	28448500	European	2017	-0.0481	0.006287	2e-14	-	-	-	-	-	cm increase
rs10520573	rs10520573	chr15:84591575	chr15:83922823	G	A	Waist circumference adjusted for physical activity	EFO_0007789	GIANT	28448500	European	2017	0.0376	0.0037	2.95e-24	+	166823	0	166823	55	IVNT
rs10520573	rs10520573	chr15:84591575	chr15:83922823	G	A	Waist circumference adjusted for physical activity	EFO_0007789	GIANT	28448500	Mixed	2017	0.0362	0.0035	7.29e-25	+	186778	0	186778	58	IVNT
rs8094261	rs8094261	chr18:20746728	chr18:23166764	C	G	Waist circumference adjusted for physical activity	EFO_0007789	GIANT	28448500	European	2017	0.0354	0.0048	8.85e-14	+	167853	0	167853	55	IVNT
rs8094261	rs8094261	chr18:20746728	chr18:23166764	C	G	Waist circumference adjusted for physical activity	EFO_0007789	GIANT	28448500	Mixed	2017	0.0326	0.0045	5.04e-13	+	187811	0	187811	58	IVNT
rs1346789	rs1346789	chr2:56092052	chr2:55864917	T	C	Waist circumference adjusted for physical activity	EFO_0007789	GIANT	28448500	European	2017	0.031	0.0048	1.21e-10	+	142693	0	142693	55	IVNT
rs1346789	rs1346789	chr2:56092052	chr2:55864917	T	C	Waist circumference adjusted for physical activity	EFO_0007789	GIANT	28448500	Mixed	2017	0.0304	0.0046	3.03e-11	+	156142	0	156142	58	IVNT
rs3791679	rs3791679	chr2:56096892	chr2:55869757	G	A	Waist circumference adjusted for physical activity	EFO_0007789	GIANT	28448500	European	2017	-0.036	0.0045	6.59e-16	-	157932	0	157932	55	IVNT
rs3791679	rs3791679	chr2:56096892	chr2:55869757	G	A	Waist circumference adjusted for physical activity	EFO_0007789	GIANT	28448500	Mixed	2017	-0.0334	0.0043	6.64e-15	-	177890	0	177890	58	IVNT
rs1443537	rs1443537	chr4:82150880	chr4:81229726	C	A	Waist circumference adjusted for physical activity	EFO_0007789	GIANT	28448500	European	2017	-0.0246	0.0043	1.12e-08	-	163159	0	163159	55	IVNT
rs1443537	rs1443537	chr4:82150880	chr4:81229726	C	A	Waist circumference adjusted for physical activity	EFO_0007789	GIANT	28448500	Mixed	2017	-0.0227	0.004	1.99e-08	-	183117	0	183117	58	IVNT
rs1712374	rs1712374	chr4:82154710	chr4:81233556	T	C	Waist circumference adjusted for physical activity	EFO_0007789	GIANT	28448500	European	2017	-0.0224	0.004	2.49e-08	-	167979	0	167979	55	IVNT
rs314263	rs314263	chr6:105392745	chr6:104944870	C	T	Waist circumference adjusted for physical activity	EFO_0007789	GIANT	28448500	European	2017	0.0273	0.0045	1.45e-09	+	129562	0	129562	55	IVNT
rs314263	rs314263	chr6:105392745	chr6:104944870	C	T	Waist circumference adjusted for physical activity	EFO_0007789	GIANT	28448500	Mixed	2017	0.0243	0.0043	1.29e-08	+	143011	0	143011	58	IVNT
rs10520573	rs10520573	chr15:84591575	chr15:83922823	G	A	Waist circumference adjusted for physical activity in females	EFO_0007789	GIANT	28448500	Mixed	2017	0.0372	0.0052	7.21e-13	+	83210	0	83210	51	IVNT
rs1346789	rs1346789	chr2:56092052	chr2:55864917	T	C	Waist circumference adjusted for physical activity in females	EFO_0007789	GIANT	28448500	Mixed	2017	0.0432	0.0071	9.58e-10	+	65121	0	65121	51	IVNT
rs3791679	rs3791679	chr2:56096892	chr2:55869757	G	A	Waist circumference adjusted for physical activity in females	EFO_0007789	GIANT	28448500	Mixed	2017	-0.0465	0.0064	3.43e-13	-	78929	0	78929	51	IVNT
rs314263	rs314263	chr6:105392745	chr6:104944870	C	T	Waist circumference adjusted for physical activity in females	EFO_0007789	GIANT	28448500	Mixed	2017	0.0377	0.0067	2.18e-08	+	56481	0	56481	51	IVNT
rs10520573	rs10520573	chr15:84591575	chr15:83922823	G	A	Waist circumference adjusted for smoking	EFO_0007789;EFO_0004318	GIANT	28443625	European	2017	0.0343	0.0036	1.193e-21	+	182351	0	182351	68	IVNT
rs10520573	rs10520573	chr15:84591575	chr15:83922823	G	A	Waist circumference adjusted for smoking	EFO_0007789;EFO_0004318	GIANT	28443625	Mixed	2017	0.0328	0.0034	7.44e-22	+	204431	0	204431	74	IVNT
rs8094261	rs8094261	chr18:20746728	chr18:23166764	C	G	Waist circumference adjusted for smoking	EFO_0007789;EFO_0004318	GIANT	28443625	European	2017	0.0392	0.0046	2.695e-17	+	182850	0	182850	68	IVNT
rs8094261	rs8094261	chr18:20746728	chr18:23166764	C	G	Waist circumference adjusted for smoking	EFO_0007789;EFO_0004318	GIANT	28443625	Mixed	2017	0.0362	0.0043	4.617e-17	+	204940	0	204940	74	IVNT
rs1346789	rs1346789	chr2:56092052	chr2:55864917	T	C	Waist circumference adjusted for smoking	EFO_0007789;EFO_0004318	GIANT	28443625	European	2017	0.0284	0.0047	1.64e-09	+	149923	0	149923	68	IVNT
rs1346789	rs1346789	chr2:56092052	chr2:55864917	T	C	Waist circumference adjusted for smoking	EFO_0007789;EFO_0004318	GIANT	28443625	Mixed	2017	0.0284	0.0045	2.477e-10	+	165091	0	165091	74	IVNT
rs3791679	rs3791679	chr2:56096892	chr2:55869757	G	A	Waist circumference adjusted for smoking	EFO_0007789;EFO_0004318	GIANT	28443625	European	2017	-0.0382	0.0046	6.876e-17	-	155582	0	155582	68	IVNT
rs3791679	rs3791679	chr2:56096892	chr2:55869757	G	A	Waist circumference adjusted for smoking	EFO_0007789;EFO_0004318	GIANT	28443625	Mixed	2017	-0.0354	0.0044	5.004e-16	-	177531	0	177531	74	IVNT
rs6763927	rs6763927	chr3:141140366	chr3:141421524	A	T	Waist circumference adjusted for smoking	EFO_0007789;EFO_0004318	GIANT	28443625	European	2017	-0.0265	0.0042	2.224e-10	-	141065	0	141065	68	IVNT
rs6763927	rs6763927	chr3:141140366	chr3:141421524	A	T	Waist circumference adjusted for smoking	EFO_0007789;EFO_0004318	GIANT	28443625	Mixed	2017	-0.0253	0.004	3.018e-10	-	154872	0	154872	74	IVNT
rs1443537	rs1443537	chr4:82150880	chr4:81229726	C	A	Waist circumference adjusted for smoking	EFO_0007789;EFO_0004318	GIANT	28443625	European	2017	-0.0235	0.0042	2.121e-08	-	180216	0	180216	68	IVNT
rs1712374	rs1712374	chr4:82154710	chr4:81233556	T	C	Waist circumference adjusted for smoking	EFO_0007789;EFO_0004318	GIANT	28443625	European	2017	-0.0221	0.0039	1.563e-08	-	182198	0	182198	68	IVNT
rs314263	rs314263	chr6:105392745	chr6:104944870	C	T	Waist circumference adjusted for smoking	EFO_0007789;EFO_0004318	GIANT	28443625	European	2017	0.0314	0.0048	3.851e-11	+	120906	0	120906	68	IVNT
rs314263	rs314263	chr6:105392745	chr6:104944870	C	T	Waist circumference adjusted for smoking	EFO_0007789;EFO_0004318	GIANT	28443625	Mixed	2017	0.028	0.0045	6.794e-10	+	134713	0	134713	74	IVNT
rs10520573	rs10520573	chr15:84591575	chr15:83922823	G	A	Waist circumference adjusted for smoking in females	EFO_0007789	GIANT	28443625	Mixed	2017	0.0261	0.0044	2.913e-09	+	115576	0	115576	70	IVNT
rs8094261	rs8094261	chr18:20746728	chr18:23166764	C	G	Waist circumference adjusted for smoking in females	EFO_0007789	GIANT	28443625	Mixed	2017	0.0339	0.0056	1.648e-09	+	116064	0	116064	70	IVNT
rs10520573	rs10520573	chr15:84591575	chr15:83922823	G	A	Waist circumference in female non-smokers	EFO_0004342	GIANT	28443625	Mixed	2017	0.0282	0.0049	6.198e-09	+	96081	0	96081	70	IVNT
rs10520573	rs10520573	chr15:84591575	chr15:83922823	G	A	Waist circumference in male non-smokers	EFO_0004342	GIANT	28443625	Mixed	2017	0.0505	0.0057	1.016e-18	+	67393	0	67393	68	IVNT
rs8094261	rs8094261	chr18:20746728	chr18:23166764	C	G	Waist circumference in male non-smokers	EFO_0004342	GIANT	28443625	Mixed	2017	0.0449	0.0072	5.108e-10	+	68027	0	68027	68	IVNT
rs3791679	rs3791679	chr2:56096892	chr2:55869757	G	A	Waist circumference in male non-smokers	EFO_0004342	GIANT	28443625	Mixed	2017	-0.0422	0.0069	9.312e-10	-	64779	0	64779	68	IVNT
rs10520573	rs10520573	chr15:84591575	chr15:83922823	G	A	Waist circumference in non-smokers	EFO_0004342	GIANT	28443625	European	2017	0.0395	0.0041	4.258e-22	+	144090	0	144090	68	IVNT
rs10520573	rs10520573	chr15:84591575	chr15:83922823	G	A	Waist circumference in non-smokers	EFO_0004342	GIANT	28443625	Mixed	2017	0.0377	0.0039	1.765e-22	+	163474	0	163474	74	IVNT
rs8094261	rs8094261	chr18:20746728	chr18:23166764	C	G	Waist circumference in non-smokers	EFO_0004342	GIANT	28443625	European	2017	0.0409	0.0052	3.729e-15	+	144983	0	144983	68	IVNT
rs8094261	rs8094261	chr18:20746728	chr18:23166764	C	G	Waist circumference in non-smokers	EFO_0004342	GIANT	28443625	Mixed	2017	0.0375	0.0048	1.018e-14	+	164377	0	164377	74	IVNT
rs1346789	rs1346789	chr2:56092052	chr2:55864917	T	C	Waist circumference in non-smokers	EFO_0004342	GIANT	28443625	European	2017	0.029	0.0053	3.635e-08	+	119873	0	119873	68	IVNT
rs1346789	rs1346789	chr2:56092052	chr2:55864917	T	C	Waist circumference in non-smokers	EFO_0004342	GIANT	28443625	Mixed	2017	0.0291	0.005	6.663e-09	+	133188	0	133188	74	IVNT
rs3791679	rs3791679	chr2:56096892	chr2:55869757	G	A	Waist circumference in non-smokers	EFO_0004342	GIANT	28443625	European	2017	-0.0372	0.0052	8.529e-13	-	120711	0	120711	68	IVNT
rs3791679	rs3791679	chr2:56096892	chr2:55869757	G	A	Waist circumference in non-smokers	EFO_0004342	GIANT	28443625	Mixed	2017	-0.0344	0.0049	2.122e-12	-	139994	0	139994	74	IVNT
rs10520573	rs10520573	chr15:84591575	chr15:83922823	G	A	Waist circumference in physically active females	EFO_0004342	GIANT	28448500	Mixed	2017	0.0448	0.0059	4.7e-14	+	63066	0	63066	51	IVNT
rs1346789	rs1346789	chr2:56092052	chr2:55864917	T	C	Waist circumference in physically active females	EFO_0004342	GIANT	28448500	Mixed	2017	0.0454	0.008	1.37e-08	+	49517	0	49517	51	IVNT
rs3791679	rs3791679	chr2:56096892	chr2:55869757	G	A	Waist circumference in physically active females	EFO_0004342	GIANT	28448500	Mixed	2017	-0.0444	0.0073	1.04e-09	-	60669	0	60669	51	IVNT
rs10520573	rs10520573	chr15:84591575	chr15:83922823	G	A	Waist circumference in physically active indivdiuals	EFO_0004342	GIANT	28448500	European	2017	0.0413	0.0043	2.84e-22	+	127678	0	127678	55	IVNT
rs10520573	rs10520573	chr15:84591575	chr15:83922823	G	A	Waist circumference in physically active indivdiuals	EFO_0004342	GIANT	28448500	Mixed	2017	0.0402	0.0041	1.91e-22	+	139609	0	139609	58	IVNT
rs8094261	rs8094261	chr18:20746728	chr18:23166764	C	G	Waist circumference in physically active indivdiuals	EFO_0004342	GIANT	28448500	European	2017	0.0378	0.0054	2.82e-12	+	128504	0	128504	55	IVNT
rs8094261	rs8094261	chr18:20746728	chr18:23166764	C	G	Waist circumference in physically active indivdiuals	EFO_0004342	GIANT	28448500	Mixed	2017	0.0337	0.0051	4.78e-11	+	140437	0	140437	58	IVNT
rs1346789	rs1346789	chr2:56092052	chr2:55864917	T	C	Waist circumference in physically active indivdiuals	EFO_0004342	GIANT	28448500	European	2017	0.0331	0.0054	8.11e-10	+	110307	0	110307	55	IVNT
rs1346789	rs1346789	chr2:56092052	chr2:55864917	T	C	Waist circumference in physically active indivdiuals	EFO_0004342	GIANT	28448500	Mixed	2017	0.033	0.0053	3.38e-10	+	117219	0	117219	58	IVNT
rs3791679	rs3791679	chr2:56096892	chr2:55869757	G	A	Waist circumference in physically active indivdiuals	EFO_0004342	GIANT	28448500	European	2017	-0.0364	0.0051	1.21e-12	-	122235	0	122235	55	IVNT
rs3791679	rs3791679	chr2:56096892	chr2:55869757	G	A	Waist circumference in physically active indivdiuals	EFO_0004342	GIANT	28448500	Mixed	2017	-0.0333	0.0049	1.52e-11	-	134093	0	134093	58	IVNT
rs10520573	rs10520573	chr15:84591575	chr15:83922823	G	A	Waist cirumference adjusted for smoking in males	EFO_0007789	GIANT	28443625	Mixed	2017	0.0418	0.0049	1.909e-17	+	88854	0	88854	68	IVNT
rs8094261	rs8094261	chr18:20746728	chr18:23166764	C	G	Waist cirumference adjusted for smoking in males	EFO_0007789	GIANT	28443625	Mixed	2017	0.0399	0.0062	1.571e-10	+	88876	0	88876	68	IVNT
rs3791679	rs3791679	chr2:56096892	chr2:55869757	G	A	Waist cirumference adjusted for smoking in males	EFO_0007789	GIANT	28443625	Mixed	2017	-0.0409	0.0058	2.365e-12	-	85215	0	85215	68	IVNT
rs6763927	rs6763927	chr3:141140366	chr3:141421524	A	T	Waist cirumference adjusted for smoking in males	EFO_0007789	GIANT	28443625	Mixed	2017	-0.0347	0.0058	2.307e-09	-	65394	0	65394	68	IVNT
rs314263	rs314263	chr6:105392745	chr6:104944870	C	T	Waist cirumference adjusted for smoking in males	EFO_0007789	GIANT	28443625	Mixed	2017	0.0432	0.0062	2.127e-12	+	65386	0	65386	68	IVNT
rs143384	rs143384	chr20:34025756	chr20:35437976	G	A	Waist hip ratio adjusted for BMI	EFO_0007788	GIANT	25673412	Mixed	2015	-0.021	0.0036	7.2e-09	-	222997	0	222997	109	IVNT
rs143384	rs143384	chr20:34025756	chr20:35437976	G	A	Waist hip ratio in physically active indivdiuals	EFO_0004343	GIANT	28448500	European	2017	-0.0281	0.0047	3.14e-09	-	114710	0	114710	52	IVNT
rs143384	rs143384	chr20:34025756	chr20:35437976	G	A	Waist hip ratio in physically active indivdiuals	EFO_0004343	GIANT	28448500	Mixed	2017	-0.0249	0.0046	4.6e-08	-	123455	0	123455	55	IVNT
rs67807996	rs67807996	chr1:149995265	chr1:150023307	A	G	Weight	EFO_0004338	Neale B	UKBB	European	2017	0.01883	0.002236	3.834e-17	+	336227	0	336227	1	IVNT
rs2364232	rs2364232	chr12:93994827	chr12:93601051	A	C	Weight	EFO_0004338	Neale B	UKBB	European	2017	-0.02076	0.002429	1.303e-17	-	336227	0	336227	1	IVNT
rs10520573	rs10520573	chr15:84591575	chr15:83922823	G	A	Weight	EFO_0004338	Neale B	UKBB	European	2017	0.01361	0.002129	1.661e-10	+	336227	0	336227	1	IVNT
rs71385734	rs71385734	chr16:2160503	chr16:2110502	G	T	Weight	EFO_0004338	Neale B	UKBB	European	2017	-0.02819	0.002846	3.965e-23	-	336227	0	336227	1	IVNT
rs7238093	rs7238093	chr18:20728158	chr18:23148194	A	T	Weight	EFO_0004338	Neale B	UKBB	European	2017	-0.02748	0.002587	2.383e-26	-	336227	0	336227	1	IVNT
rs7244464	rs7244464	chr18:20729714	chr18:23149750	A	C	Weight	EFO_0004338	Neale B	UKBB	European	2017	-0.02753	0.002575	1.146e-26	-	336227	0	336227	1	IVNT
rs8094261	rs8094261	chr18:20746728	chr18:23166764	C	G	Weight	EFO_0004338	Neale B	UKBB	European	2017	0.02402	0.00268	3.261e-19	+	336227	0	336227	1	IVNT
rs1346789	rs1346789	chr2:56092052	chr2:55864917	T	C	Weight	EFO_0004338	Neale B	UKBB	European	2017	0.01973	0.00263	6.252e-14	+	336227	0	336227	1	IVNT
rs3791679	rs3791679	chr2:56096892	chr2:55869757	G	A	Weight	EFO_0004338	Neale B	UKBB	European	2017	-0.02129	0.002538	4.93e-17	-	336227	0	336227	1	IVNT
rs143384	rs143384	chr20:34025756	chr20:35437976	G	A	Weight	EFO_0004338	GIANT	23754948	European	2013	0.03294	0.004802	6.897e-12	+	125904	0	125904	46	IVNT
rs143384	rs143384	chr20:34025756	chr20:35437976	G	A	Weight	EFO_0004338	Neale B	UKBB	European	2017	0.03326	0.002161	1.932e-53	+	336227	0	336227	1	IVNT
rs6763927	rs6763927	chr3:141140366	chr3:141421524	A	T	Weight	EFO_0004338	GIANT	23754948	European	2013	-0.04076	0.004486	1.026e-19	-	125912	0	125912	46	IVNT
rs6763927	rs6763927	chr3:141140366	chr3:141421524	A	T	Weight	EFO_0004338	Neale B	UKBB	European	2017	-0.03313	0.002143	6.579e-54	-	336227	0	336227	1	IVNT
rs7623981	rs7623981	chr3:172135334	chr3:172417544	C	T	Weight	EFO_0004338	Neale B	UKBB	European	2017	-0.01286	0.002145	2.051e-09	-	336227	0	336227	1	IVNT
rs2131354	rs2131354	chr4:145599908	chr4:144678756	G	A	Weight	EFO_0004338	Neale B	UKBB	European	2017	-0.02133	0.002128	1.235e-23	-	336227	0	336227	1	IVNT
rs6537315	rs6537315	chr4:145724712	chr4:144803560	A	G	Weight	EFO_0004338	Neale B	UKBB	European	2017	-0.02064	0.002139	5.011e-22	-	336227	0	336227	1	IVNT
rs6817306	rs6817306	chr4:17868058	chr4:17866435	C	T	Weight	EFO_0004338	GIANT	23754948	European	2013	-0.03936	0.00668	3.813e-09	-	125893	0	125893	46	IVNT
rs6817306	rs6817306	chr4:17868058	chr4:17866435	C	T	Weight	EFO_0004338	Neale B	UKBB	European	2017	-0.0221	0.00303	3.055e-13	-	336227	0	336227	1	IVNT
rs1443537	rs1443537	chr4:82150880	chr4:81229726	C	A	Weight	EFO_0004338	GIANT	23754948	European	2013	-0.02879	0.005123	1.908e-08	-	125902	0	125902	46	IVNT
rs1443537	rs1443537	chr4:82150880	chr4:81229726	C	A	Weight	EFO_0004338	Neale B	UKBB	European	2017	-0.01533	0.002439	3.277e-10	-	336227	0	336227	1	IVNT
rs1712374	rs1712374	chr4:82154710	chr4:81233556	T	C	Weight	EFO_0004338	GIANT	23754948	European	2013	-0.028	0.004802	5.513e-09	-	125898	0	125898	46	IVNT
rs1712374	rs1712374	chr4:82154710	chr4:81233556	T	C	Weight	EFO_0004338	Neale B	UKBB	European	2017	-0.0155	0.002304	1.719e-11	-	336227	0	336227	1	IVNT
rs409012	rs409012	chr5:77375625	chr5:78079801	A	C	Weight	EFO_0004338	Neale B	UKBB	European	2017	0.02258	0.002463	4.851e-20	+	336227	0	336227	1	IVNT
rs7766336	rs7766336	chr6:105388405	chr6:104940530	G	T	Weight	EFO_0004338	Neale B	UKBB	European	2017	-0.01242	0.002272	4.621e-08	-	336227	0	336227	1	IVNT
rs314263	rs314263	chr6:105392745	chr6:104944870	C	T	Weight	EFO_0004338	Neale B	UKBB	European	2017	0.01243	0.002272	4.445e-08	+	336227	0	336227	1	IVNT
rs1361107	rs1361107	chr6:126767511	chr6:126446365	A	C	Weight	EFO_0004338	Neale B	UKBB	European	2017	-0.01226	0.00213	8.702e-09	-	336227	0	336227	1	IVNT
rs1159619	rs1159619	chr6:126801144	chr6:126479998	A	C	Weight	EFO_0004338	Neale B	UKBB	European	2017	0.01252	0.002132	4.274e-09	+	336227	0	336227	1	IVNT
rs9496369	rs9496369	chr6:142724918	chr6:142403781	C	T	Weight	EFO_0004338	Neale B	UKBB	European	2017	0.01872	0.002356	1.953e-15	+	336227	0	336227	1	IVNT
rs7770386	rs7770386	chr6:142775657	chr6:142454520	C	T	Weight	EFO_0004338	Neale B	UKBB	European	2017	0.01826	0.002352	8.199e-15	+	336227	0	336227	1	IVNT
rs2814994	rs2814994	chr6:34620153	chr6:34652376	A	T	Weight	EFO_0004338	GIANT	23754948	European	2013	0.03856	0.006221	5.736e-10	+	125917	0	125917	46	IVNT
rs2814994	rs2814994	chr6:34620153	chr6:34652376	A	T	Weight	EFO_0004338	Neale B	UKBB	European	2017	0.05316	0.00306	1.434e-67	+	336227	0	336227	1	IVNT
rs10103623	rs10103623	chr8:78106082	chr8:77193846	A	G	Weight	EFO_0004338	Neale B	UKBB	European	2017	-0.01651	0.002349	2.079e-12	-	336227	0	336227	1	IVNT
rs2167733	rs2167733	chr8:78110734	chr8:77198498	G	A	Weight	EFO_0004338	Neale B	UKBB	European	2017	-0.01651	0.002353	2.318e-12	-	336227	0	336227	1	IVNT
rs6763927	rs6763927	chr3:141140366	chr3:141421524	A	T	Weight in females	HP_0000868	GIANT	23754948	European	2013	-0.036	0.0062	6.3e-09	-	67590	0	67590	46	IVNT
rs6763927	rs6763927	chr3:141140366	chr3:141421524	A	T	Weight in males	HP_0012041;HP_0000033	GIANT	23754948	European	2013	-0.046	0.0065	1.22e-12	-	58321	0	58321	46	IVNT
rs67807996	rs67807996	chr1:149995265	chr1:150023307	A	G	Whole body fat mass	-	Neale B	UKBB	European	2017	0.02277	0.002496	7.596e-20	+	330762	0	330762	1	IVNT
rs10520573	rs10520573	chr15:84591575	chr15:83922823	G	A	Whole body fat mass	-	Neale B	UKBB	European	2017	0.01927	0.002378	5.322e-16	+	330762	0	330762	1	IVNT
rs71385734	rs71385734	chr16:2160503	chr16:2110502	G	T	Whole body fat mass	-	Neale B	UKBB	European	2017	-0.02339	0.003177	1.828e-13	-	330762	0	330762	1	IVNT
rs7238093	rs7238093	chr18:20728158	chr18:23148194	A	T	Whole body fat mass	-	Neale B	UKBB	European	2017	-0.01771	0.002889	8.766e-10	-	330762	0	330762	1	IVNT
rs7244464	rs7244464	chr18:20729714	chr18:23149750	A	C	Whole body fat mass	-	Neale B	UKBB	European	2017	-0.01784	0.002875	5.545e-10	-	330762	0	330762	1	IVNT
rs3791679	rs3791679	chr2:56096892	chr2:55869757	G	A	Whole body fat mass	-	Neale B	UKBB	European	2017	-0.0166	0.002834	4.677e-09	-	330762	0	330762	1	IVNT
rs143384	rs143384	chr20:34025756	chr20:35437976	G	A	Whole body fat mass	-	Neale B	UKBB	European	2017	0.01432	0.002414	2.963e-09	+	330762	0	330762	1	IVNT
rs6763927	rs6763927	chr3:141140366	chr3:141421524	A	T	Whole body fat mass	-	Neale B	UKBB	European	2017	-0.0226	0.002393	3.562e-21	-	330762	0	330762	1	IVNT
rs2131354	rs2131354	chr4:145599908	chr4:144678756	G	A	Whole body fat mass	-	Neale B	UKBB	European	2017	-0.01322	0.002376	2.634e-08	-	330762	0	330762	1	IVNT
rs409012	rs409012	chr5:77375625	chr5:78079801	A	C	Whole body fat mass	-	Neale B	UKBB	European	2017	0.01954	0.002751	1.213e-12	+	330762	0	330762	1	IVNT
rs2814994	rs2814994	chr6:34620153	chr6:34652376	A	T	Whole body fat mass	-	Neale B	UKBB	European	2017	0.04633	0.003419	8.123e-42	+	330762	0	330762	1	IVNT
rs67807996	rs67807996	chr1:149995265	chr1:150023307	A	G	Whole body fat-free mass	-	Neale B	UKBB	European	2017	0.009076	0.001618	2.036e-08	+	331291	0	331291	1	IVNT
rs823094	rs823094	chr1:205689807	chr1:205720679	G	T	Whole body fat-free mass	-	Neale B	UKBB	European	2017	-0.01212	0.001557	6.861e-15	-	331291	0	331291	1	IVNT
rs2724648	rs2724648	chr12:11858191	chr12:11705257	T	C	Whole body fat-free mass	-	Neale B	UKBB	European	2017	-0.01342	0.001602	5.465e-17	-	331291	0	331291	1	IVNT
rs28406193	rs28406193	chr12:123891865	chr12:123407318	G	T	Whole body fat-free mass	-	Neale B	UKBB	European	2017	-0.01427	0.001908	7.564e-14	-	331291	0	331291	1	IVNT
rs28481863	rs28481863	chr12:123902361	chr12:123417814	A	G	Whole body fat-free mass	-	Neale B	UKBB	European	2017	-0.01519	0.001951	6.958e-15	-	331291	0	331291	1	IVNT
rs2364232	rs2364232	chr12:93994827	chr12:93601051	A	C	Whole body fat-free mass	-	Neale B	UKBB	European	2017	-0.02376	0.001758	1.325e-41	-	331291	0	331291	1	IVNT
rs71385734	rs71385734	chr16:2160503	chr16:2110502	G	T	Whole body fat-free mass	-	Neale B	UKBB	European	2017	-0.02391	0.002059	3.578e-31	-	331291	0	331291	1	IVNT
rs7238093	rs7238093	chr18:20728158	chr18:23148194	A	T	Whole body fat-free mass	-	Neale B	UKBB	European	2017	-0.02696	0.001872	5.079e-47	-	331291	0	331291	1	IVNT
rs7244464	rs7244464	chr18:20729714	chr18:23149750	A	C	Whole body fat-free mass	-	Neale B	UKBB	European	2017	-0.02686	0.001863	4.337e-47	-	331291	0	331291	1	IVNT
rs8094261	rs8094261	chr18:20746728	chr18:23166764	C	G	Whole body fat-free mass	-	Neale B	UKBB	European	2017	0.0233	0.001939	3.071e-33	+	331291	0	331291	1	IVNT
rs1346789	rs1346789	chr2:56092052	chr2:55864917	T	C	Whole body fat-free mass	-	Neale B	UKBB	European	2017	0.01683	0.001903	9.44e-19	+	331291	0	331291	1	IVNT
rs3791679	rs3791679	chr2:56096892	chr2:55869757	G	A	Whole body fat-free mass	-	Neale B	UKBB	European	2017	-0.01783	0.001837	2.78e-22	-	331291	0	331291	1	IVNT
rs143384	rs143384	chr20:34025756	chr20:35437976	G	A	Whole body fat-free mass	-	Neale B	UKBB	European	2017	0.03793	0.001563	6.024e-130	+	331291	0	331291	1	IVNT
rs6763927	rs6763927	chr3:141140366	chr3:141421524	A	T	Whole body fat-free mass	-	Neale B	UKBB	European	2017	-0.02954	0.00155	6.75e-81	-	331291	0	331291	1	IVNT
rs7623981	rs7623981	chr3:172135334	chr3:172417544	C	T	Whole body fat-free mass	-	Neale B	UKBB	European	2017	-0.01516	0.001552	1.575e-22	-	331291	0	331291	1	IVNT
rs2131354	rs2131354	chr4:145599908	chr4:144678756	G	A	Whole body fat-free mass	-	Neale B	UKBB	European	2017	-0.02076	0.00154	2.024e-41	-	331291	0	331291	1	IVNT
rs6537315	rs6537315	chr4:145724712	chr4:144803560	A	G	Whole body fat-free mass	-	Neale B	UKBB	European	2017	-0.0201	0.001548	1.455e-38	-	331291	0	331291	1	IVNT
rs6817306	rs6817306	chr4:17868058	chr4:17866435	C	T	Whole body fat-free mass	-	Neale B	UKBB	European	2017	-0.03142	0.002192	1.433e-46	-	331291	0	331291	1	IVNT
rs1443537	rs1443537	chr4:82150880	chr4:81229726	C	A	Whole body fat-free mass	-	Neale B	UKBB	European	2017	-0.01117	0.001765	2.494e-10	-	331291	0	331291	1	IVNT
rs1712374	rs1712374	chr4:82154710	chr4:81233556	T	C	Whole body fat-free mass	-	Neale B	UKBB	European	2017	-0.01221	0.001667	2.464e-13	-	331291	0	331291	1	IVNT
rs409012	rs409012	chr5:77375625	chr5:78079801	A	C	Whole body fat-free mass	-	Neale B	UKBB	European	2017	0.01683	0.001783	3.625e-21	+	331291	0	331291	1	IVNT
rs7766336	rs7766336	chr6:105388405	chr6:104940530	G	T	Whole body fat-free mass	-	Neale B	UKBB	European	2017	-0.009685	0.001644	3.859e-09	-	331291	0	331291	1	IVNT
rs314263	rs314263	chr6:105392745	chr6:104944870	C	T	Whole body fat-free mass	-	Neale B	UKBB	European	2017	0.009703	0.001644	3.606e-09	+	331291	0	331291	1	IVNT
rs1361107	rs1361107	chr6:126767511	chr6:126446365	A	C	Whole body fat-free mass	-	Neale B	UKBB	European	2017	-0.02178	0.001541	2.453e-45	-	331291	0	331291	1	IVNT
rs1159619	rs1159619	chr6:126801144	chr6:126479998	A	C	Whole body fat-free mass	-	Neale B	UKBB	European	2017	0.0219	0.001543	1.055e-45	+	331291	0	331291	1	IVNT
rs9496369	rs9496369	chr6:142724918	chr6:142403781	C	T	Whole body fat-free mass	-	Neale B	UKBB	European	2017	0.01756	0.001705	7.074e-25	+	331291	0	331291	1	IVNT
rs7770386	rs7770386	chr6:142775657	chr6:142454520	C	T	Whole body fat-free mass	-	Neale B	UKBB	European	2017	0.0171	0.001702	9.141e-24	+	331291	0	331291	1	IVNT
rs2814994	rs2814994	chr6:34620153	chr6:34652376	A	T	Whole body fat-free mass	-	Neale B	UKBB	European	2017	0.03908	0.002216	1.402e-69	+	331291	0	331291	1	IVNT
rs10103623	rs10103623	chr8:78106082	chr8:77193846	A	G	Whole body fat-free mass	-	Neale B	UKBB	European	2017	-0.02102	0.0017	4.15e-35	-	331291	0	331291	1	IVNT
rs2167733	rs2167733	chr8:78110734	chr8:77198498	G	A	Whole body fat-free mass	-	Neale B	UKBB	European	2017	-0.02096	0.001703	8.252e-35	-	331291	0	331291	1	IVNT
rs823094	rs823094	chr1:205689807	chr1:205720679	G	T	Whole body water mass	-	Neale B	UKBB	European	2017	-0.01208	0.001559	9.28e-15	-	331315	0	331315	1	IVNT
rs2724648	rs2724648	chr12:11858191	chr12:11705257	T	C	Whole body water mass	-	Neale B	UKBB	European	2017	-0.01311	0.001604	2.971e-16	-	331315	0	331315	1	IVNT
rs28406193	rs28406193	chr12:123891865	chr12:123407318	G	T	Whole body water mass	-	Neale B	UKBB	European	2017	-0.01441	0.001911	4.639e-14	-	331315	0	331315	1	IVNT
rs28481863	rs28481863	chr12:123902361	chr12:123417814	A	G	Whole body water mass	-	Neale B	UKBB	European	2017	-0.01541	0.001954	3.14e-15	-	331315	0	331315	1	IVNT
rs2364232	rs2364232	chr12:93994827	chr12:93601051	A	C	Whole body water mass	-	Neale B	UKBB	European	2017	-0.02377	0.001761	1.642e-41	-	331315	0	331315	1	IVNT
rs71385734	rs71385734	chr16:2160503	chr16:2110502	G	T	Whole body water mass	-	Neale B	UKBB	European	2017	-0.02401	0.002062	2.587e-31	-	331315	0	331315	1	IVNT
rs7238093	rs7238093	chr18:20728158	chr18:23148194	A	T	Whole body water mass	-	Neale B	UKBB	European	2017	-0.02646	0.001875	3.142e-45	-	331315	0	331315	1	IVNT
rs7244464	rs7244464	chr18:20729714	chr18:23149750	A	C	Whole body water mass	-	Neale B	UKBB	European	2017	-0.02638	0.001866	2.293e-45	-	331315	0	331315	1	IVNT
rs8094261	rs8094261	chr18:20746728	chr18:23166764	C	G	Whole body water mass	-	Neale B	UKBB	European	2017	0.02281	0.001942	7.598e-32	+	331315	0	331315	1	IVNT
rs1346789	rs1346789	chr2:56092052	chr2:55864917	T	C	Whole body water mass	-	Neale B	UKBB	European	2017	0.01657	0.001906	3.512e-18	+	331315	0	331315	1	IVNT
rs3791679	rs3791679	chr2:56096892	chr2:55869757	G	A	Whole body water mass	-	Neale B	UKBB	European	2017	-0.0176	0.00184	1.108e-21	-	331315	0	331315	1	IVNT
rs143384	rs143384	chr20:34025756	chr20:35437976	G	A	Whole body water mass	-	Neale B	UKBB	European	2017	0.03748	0.001565	1.326e-126	+	331315	0	331315	1	IVNT
rs6763927	rs6763927	chr3:141140366	chr3:141421524	A	T	Whole body water mass	-	Neale B	UKBB	European	2017	-0.02936	0.001553	1.034e-79	-	331315	0	331315	1	IVNT
rs7623981	rs7623981	chr3:172135334	chr3:172417544	C	T	Whole body water mass	-	Neale B	UKBB	European	2017	-0.01499	0.001555	5.284e-22	-	331315	0	331315	1	IVNT
rs2131354	rs2131354	chr4:145599908	chr4:144678756	G	A	Whole body water mass	-	Neale B	UKBB	European	2017	-0.02074	0.001542	3.142e-41	-	331315	0	331315	1	IVNT
rs6537315	rs6537315	chr4:145724712	chr4:144803560	A	G	Whole body water mass	-	Neale B	UKBB	European	2017	-0.02016	0.00155	1.169e-38	-	331315	0	331315	1	IVNT
rs6817306	rs6817306	chr4:17868058	chr4:17866435	C	T	Whole body water mass	-	Neale B	UKBB	European	2017	-0.03132	0.002195	3.593e-46	-	331315	0	331315	1	IVNT
rs1443537	rs1443537	chr4:82150880	chr4:81229726	C	A	Whole body water mass	-	Neale B	UKBB	European	2017	-0.01115	0.001768	2.823e-10	-	331315	0	331315	1	IVNT
rs1712374	rs1712374	chr4:82154710	chr4:81233556	T	C	Whole body water mass	-	Neale B	UKBB	European	2017	-0.01208	0.00167	4.693e-13	-	331315	0	331315	1	IVNT
rs409012	rs409012	chr5:77375625	chr5:78079801	A	C	Whole body water mass	-	Neale B	UKBB	European	2017	0.01664	0.001785	1.139e-20	+	331315	0	331315	1	IVNT
rs7766336	rs7766336	chr6:105388405	chr6:104940530	G	T	Whole body water mass	-	Neale B	UKBB	European	2017	-0.009201	0.001647	2.3e-08	-	331315	0	331315	1	IVNT
rs314263	rs314263	chr6:105392745	chr6:104944870	C	T	Whole body water mass	-	Neale B	UKBB	European	2017	0.009216	0.001647	2.179e-08	+	331315	0	331315	1	IVNT
rs1361107	rs1361107	chr6:126767511	chr6:126446365	A	C	Whole body water mass	-	Neale B	UKBB	European	2017	-0.02151	0.001543	3.661e-44	-	331315	0	331315	1	IVNT
rs1159619	rs1159619	chr6:126801144	chr6:126479998	A	C	Whole body water mass	-	Neale B	UKBB	European	2017	0.02165	0.001545	1.349e-44	+	331315	0	331315	1	IVNT
rs9496369	rs9496369	chr6:142724918	chr6:142403781	C	T	Whole body water mass	-	Neale B	UKBB	European	2017	0.01741	0.001707	2.09e-24	+	331315	0	331315	1	IVNT
rs7770386	rs7770386	chr6:142775657	chr6:142454520	C	T	Whole body water mass	-	Neale B	UKBB	European	2017	0.01696	0.001704	2.433e-23	+	331315	0	331315	1	IVNT
rs2814994	rs2814994	chr6:34620153	chr6:34652376	A	T	Whole body water mass	-	Neale B	UKBB	European	2017	0.03899	0.002219	4.741e-69	+	331315	0	331315	1	IVNT
rs10103623	rs10103623	chr8:78106082	chr8:77193846	A	G	Whole body water mass	-	Neale B	UKBB	European	2017	-0.02076	0.001703	3.504e-34	-	331315	0	331315	1	IVNT
rs2167733	rs2167733	chr8:78110734	chr8:77198498	G	A	Whole body water mass	-	Neale B	UKBB	European	2017	-0.0207	0.001706	6.786e-34	-	331315	0	331315	1	IVNT
rs28406193	rs28406193	chr12:123891865	chr12:123407318	G	T	Years of educational attainment	EFO_0004784	SSGAC	27225129	European	2016	-0.023	0.003	6.174e-12	-	328917	0	328917	64	years
rs28481863	rs28481863	chr12:123902361	chr12:123417814	A	G	Years of educational attainment	EFO_0004784	SSGAC	27225129	European	2016	-0.022	0.003	7.433e-11	-	328917	0	328917	64	years

## Sheet: S6 Genes
	S6. Functionally relevant candidate gene annotations.
Signal	Phenotype	Sex	MarkerName	Chromosome	Position	Nearest Gene	Functional candidate genes	Mouse growth phenotype (relevant)	OMIM phenotype	GO terms (biological pathway)
1	I	M+F	rs67807996	1	149995265	OTUD7B	OTUD7B	decreased body weight; fusion of vertebral arches		negative regulation of transcription from RNA polymerase II promoter, in utero embryonic development, adaptive immune response, mucosal immune response, protein deubiquitination, negative regulation of interleukin-8 production, protein K11-linked deubiquitination, negative regulation of I-kappaB kinase/NF-kappaB signaling, protein K63-linked deubiquitination, protein K48-linked deubiquitination, …
2	I	M+F	rs823094	1	205689807	RAB7L1	NUCKS1	increased body weight; decreased metabolic rate; impaired glucose tolerance; increased circulating glucose; increased circulating leptin; increased circulating insulin; increased food intake		double-strand break repair via homologous recombination, cellular glucose homeostasis, regulation of DNA replication, chromatin organization, regulation of transcription from RNA polymerase II promoter, release from viral latency, replication fork processing, gene conversion, interstrand cross-link repair, positive regulation by host of viral transcription, modulation by host of viral genome repl…
3	I	M+F	rs3791679	2	56096892	EFEMP1	EFEMP1	decreased body size; decreased bone mineral density; decreased skeletal muscle weight; osteoporosis; premature aging; abnormal morphology	Doyne honeycomb degeneration of retina,	regulation of transcription, DNA-templated, epidermal growth factor receptor signaling pathway, visual perception, peptidyl-tyrosine phosphorylation, negative regulation of chondrocyte differentiation, camera-type eye development, embryonic eye morphogenesis, post-embryonic eye morphogenesis,
3	I	F	rs1346789	2	56092052		PNPT1	abnormal rib morphology; abnormal clavicle morphology	Spinocerebellar ataxia 25, Combined oxidative phosphorylation deficiency 13, Deafness, autosomal recessive 70, with or without adult-onset neurodegeneration	mitochondrial RNA catabolic process, mitochondrial mRNA catabolic process, positive regulation of mitochondrial RNA catabolic process, mitochondrial RNA 5'-end processing, mitochondrial RNA 3'-end processing, RNA catabolic process, mRNA catabolic process, cellular response to oxidative stress, cellular response to interferon-beta, RNA import into mitochondrion, rRNA import into mitochondrion, reg…
4	I	M+F	rs6763927	3	141140366	RASA2	ZBTB38			regulation of DNA replication, regulation of transcription, DNA-templated, cellular response to DNA damage stimulus, negative regulation of transcription, DNA-templated, positive regulation of transcription from RNA polymerase II promoter,
5	I	M+F	rs7623981	3	172135334	GHSR	GHSR	decreased body weight; abnormal growth hormone level; decreased circulating glucose level	Growth hormone deficiency, isolated partial	G-protein coupled receptor signaling pathway, spermatogenesis, learning or memory, actin polymerization or depolymerization, adult feeding behavior, response to hormone, hormone-mediated signaling pathway, negative regulation of norepinephrine secretion, growth hormone secretion, response to food, negative regulation of appetite, positive regulation of appetite, response to follicle-stimulating h…
6	I	M+F	rs6817306	4	17868058	NCAPG	SLIT2	abnormal development		ureteric bud development, negative regulation of protein phosphorylation, cell migration involved in sprouting angiogenesis, negative regulation of leukocyte chemotaxis, aortic valve morphogenesis, pulmonary valve morphogenesis, nervous system development, axon guidance, motor neuron axon guidance, negative regulation of lamellipodium assembly, negative regulation of endothelial cell migration, n…
7	IV	M+F	rs1443537	4	82150880	PRKG2	PRKG2	abnormal bone ossification; abnormal cranium morphology; abnormal long bone hypertrophic chondrocyte zone; decreased body length; decreased body weight; short femur; short humerus; short limbs; short tibia; short ulna; small vertebrae	Acromesomelic dysplasia 4, Spondylometaphyseal dysplasia, Pagnamenta type	protein phosphorylation, signal transduction, regulation of chondrocyte differentiation, peptidyl-serine autophosphorylation, tetrahydrobiopterin metabolic process, protein localization to plasma membrane, negative regulation of chondrocyte proliferation, negative regulation of chloride transport,
7	IV	F	rs1712374	4	82154710
8	I	M+F	rs2131354	4	145599908	HHIP	HHIP	increased body length; larger embryo		signal transduction, neuroblast proliferation, dorsal/ventral pattern formation, negative regulation of signal transduction, regulation of fibroblast growth factor receptor signaling pathway, negative regulation of apoptotic process, negative regulation of smoothened signaling pathway, skeletal system morphogenesis, epithelial tube branching involved in lung morphogenesis,
8	IV	F	rs6537315	4	145724712
9	I	M+F	rs409012	5	77375625	TBCA	AP3B1		Hermansky-Pudlak syndrome 2	cell morphogenesis, toll-like receptor signaling pathway, hematopoietic progenitor cell differentiation, respiratory system process, cellular protein modification process, protein targeting to lysosome, cellular zinc ion homeostasis, intracellular protein transport, inflammatory response, lysosome organization, spermatogenesis, single fertilization, blood coagulation, anterograde axonal transport…
9							OTP	decreased body weight; increased body fat mass; increased circulating leptin level; increased circulating insulin level; abnormal hypothalamus physiology; decreased body size; abnormal third ventricle morphology		negative regulation of transcriptnegative regulation of transcription from RNA polymerase II promoter, positive regulation of neuroblast proliferation, neuroblast proliferation, forebrain neuron differentiation, hypothalamus cell differentiation, neurohypophysis development, neuron differentiation, neuroendocrine cell differentiation, dopaminergic neuron differentiation,
10	IV	M+F	rs2814994	6	34620153	C6orf106 (ILRUN)	C6orf106 (ILRUN)	abnormal bone structure; decreased body mass		macroautophagy, negative regulation of type I interferon production, negative regulation of tumor necrosis factor production, negative regulation of DNA binding, innate immune response, negative regulation of defense response to virus, negative regulation of protein localization to nucleus,
11	V	M+F	rs7766336	6	105388405	LIN28B	LIN28B	decreased body size		miRNA catabolic process, gene silencing by RNA, pre-miRNA processing, RNA 3'-end processing, RNA destabilization, positive regulation of miRNA catabolic process, negative regulation of pre-miRNA processing, negative regulation of primary miRNA processing,
11	VI	M+F	rs314263	6	105392745
11	III	M+F	rs2181193	6	105442327
12	I	M+F	rs1361107	6	126767511	CENPW	RSPO3	decreased embryo size; short limbs; abnormal limb morphology		blood vessel remodeling, sprouting angiogenesis, Wnt signaling pathway, positive regulation of Wnt signaling pathway, canonical Wnt signaling pathway, branching involved in labyrinthine layer morphogenesis, positive regulation of canonical Wnt signaling pathway, positive regulation of non-canonical Wnt signaling pathway, positive regulation of Wnt signaling pathway, planar cell polarity pathway,
12	I	F	rs1159619	6	126801144
13	I	M+F	rs9496369	6	142724918	ADGRG6	ADGRG6	abnormal intervertebral disc morphology; abnormal sternum morphology; increased chondrocyte apoptosis; scoliosis; decreased body size; postnatal growth retardation	Lethal congenital contracture syndrome 9	cell surface receptor signaling pathway, G-protein coupled receptor signaling pathway, adenylate cyclase-activating G-protein coupled receptor signaling pathway, nervous system development, Schwann cell differentiation, cAMP-mediated signaling, myelination in peripheral nervous system, myelination, heart trabecula formation,
13	IV	M+F	rs7770386	6	142775657
14	I	M+F	rs10103623	8	78106082	PEX2	HNF4G	increased body weight		regulation of transcription from RNA polymerase II promoter, cell differentiation, intracellular receptor signaling pathway, positive regulation of transcription from RNA polymerase II promoter, anatomical structure development,
14	I	F	rs2167733	8	78110734
15	III	F	rs72829034	10	64129318	ZNF365	ARID5B	abnormal skeleton morphology; decreased body weight; postnatal growth retardation; decreased body size; abnormal endochondral bone ossification; abnormal long bone epiphysial plate morphology; abnormal long bone hypertrophic chondrocyte zone; short tibia		negative regulation of transcription from RNA polymerase II promoter, kidney development, liver development, regulation of transcription from RNA polymerase II promoter, nitrogen compound metabolic process, male gonad development, female gonad development, post-embryonic development, fibroblast migration, adrenal gland development, multicellular organism growth, fat cell differentiation, negative…
16	V	M+F	rs16911905	11	5249290	HBB			Heinz body anemia, Delta-beta thalassemia, Hereditary persistence of fetal hemoglobin, Thalassemia-beta, dominant inclusion-body, Sickle cell anemia, Malaria, resistance to, Thalassemia, beta, Methemoglobinemia, beta type, Erythrocytosis 6,	regulation of blood pressure, positive regulation of cell death, carbon dioxide transport, oxygen transport, nitric oxide transport, response to hydrogen peroxide, hydrogen peroxide catabolic process, positive regulation of nitric oxide biosynthetic process, renal absorption, platelet aggregation, regulation of blood vessel diameter, cellular oxidant detoxification,
17	I	M+F	rs2724648	12	11858191	ETV6	ETV6	abnormal morphology; decreased bone mineral density; postnatal growth retardation; embryonic growth retardation	Leukemia, acute myeloid, somatic, Thrombocytopenia 5,	negative regulation of transcription from RNA polymerase II promoter, regulation of transcription from RNA polymerase II promoter, vitellogenesis, neurogenesis, cell differentiation, positive regulation of transcription from RNA polymerase II promoter, hematopoietic stem cell proliferation, mesenchymal cell apoptotic process,
18	VI	M+F	rs2364232	12	93994827	SOCS2	SOCS2	abnormal bone trabecula morphology; abnormal long bone epiphysial plate proliferative zone; abnormal tibia morphology; decreased bone trabecular spacing; increased body weight; long tibia; abnormal IGF-1 level; increased body length; increased body weight; increased growth rate; increased length of long bones;		regulation of cell growth, JAK-STAT cascade, lactation, regulation of signal transduction, protein ubiquitination, response to estradiol, cellular response to hormone stimulus, intracellular signal transduction, negative regulation of multicellular organism growth, negative regulation of apoptotic process, regulation of phosphatidylinositol 3-kinase activity, positive regulation of neuron differe…
19	IV	M+F	rs28406193	12	123891865	KMT5A				negative regulation of transcription from RNA polymerase II promoter, chromatin organization, regulation of transcription from RNA polymerase II promoter, mitotic chromosome condensation, peptidyl-lysine monomethylation, regulation of DNA damage response, signal transduction by p53 class mediator, negative regulation of transcription, DNA-templated, cell division, regulation of signal transductio…
19	I	M+F	rs28481863	12	123902361
20	III	F	rs36103703	14	56284991	KTN1	KTN1			microtubule-based movement, protein transport,
21	I	M+F	rs11634560	15	67467830	IQCH	SMAD3	decreased body size; abnormal cartilage morphology; abnormal chondrocyte morphology; abnormal epiphyseal plate morphology; abnormal skeleton physiology; decreased bone mineral density; decreased body weight; increased width of hypertrophic chondrocyte zone	Loeys-Dietz syndrome 3	negative regulation of transcription from RNA polymerase II promoter, ureteric bud development, response to hypoxia, in utero embryonic development, mesoderm formation, somitogenesis, liver development, heart looping, osteoblast development, immune system development, regulation of transcription, DNA-templated, regulation of transcription from RNA polymerase II promoter, activation of cysteine-ty…
22	I	M+F	rs10520573	15	84591575	UBE2Q2L	ADAMTSL3	abnormal sternum morphology		extracellular matrix organization,
23	I	M+F	rs71385734	16	2160503	PKD1	PKD1	postnatal growth retardation; dwarfism; decreased body size; abnormal bone mineralization; decreased bone mineral density; decreased compact bone thickness; decreased trabecular bone volume; short femur; decreased body weight; abnormal cartilage development; other skeletal morphological abnormalities	Polycystic kidney disease 1	cartilage condensation, in utero embryonic development, kidney development, liver development, embryonic placenta development, protein export from nucleus, calcium ion transport, homophilic cell adhesion via plasma membrane adhesion molecules, cell-matrix adhesion, calcium-independent cell-matrix adhesion, positive regulation of cytosolic calcium ion concentration, JAK-STAT cascade, heart develop…
24	IV	F	rs8094261	18	20746728	CABLES1				cell cycle, nervous system development, cell division, regulation of cell cycle,
24	I	F	rs7238093	18	20728158
24	I	M+F	rs7244464	18	20729714
24	IV	M+F	rs7238093	18	20728158
25	I	M+F	rs143384	20	34025756	GDF5	GDF5	dwarfism; abnormal skeletal morphology; decreased length of long bones; abnormal cartilage development; abnormal long bone epiphyseal plate morphology; delayed endochondral bone ossification; decreased body weight; decreased body size; decreased chondrocyte number	Brachydactyly, type A2, Brachydactyly, type C, Acromesomelic dysplasia 2A, Acromesomelic dysplasia 2C, Hunter-Thompson type, Acromesomelic dysplasia 2B, Multiple synostoses syndrome 2, Osteoarthritis-5, Brachydactyly, type A1, C, Symphalangism, proximal, 1B	chondrocyte differentiation, transmembrane receptor protein serine/threonine kinase signaling pathway, transforming growth factor beta receptor signaling pathway, cell-cell signaling, response to mechanical stimulus, positive regulation of pathway-restricted SMAD protein phosphorylation, embryonic limb morphogenesis, BMP signaling pathway, positive regulation of BMP signaling pathway, negative re…
25	I	M	rs143384	20	34025756
25	IV	M+F	rs143384	20	34025756
26	I	M+F	rs1326022	20	54844025	MC3R	MC3R	decreased body length; short femur; decreased bone mineral content; decreased bone mineral density; decreased lean body mass; increased circulating insulin level; increased circulating leptin level; increased body weight;	Obesity, severe, susceptibility to, BMIQ9	regulation of heart rate, G-protein coupled receptor signaling pathway, coupled to cyclic nucleotide second messenger, adenylate cyclase-activating G-protein coupled receptor signaling pathway, phospholipase C-activating G-protein coupled receptor signaling pathway, regulation of blood pressure, regulation of metabolic process, circadian regulation of gene expression, homoiothermy, locomotor rhyt…

## Sheet: S7 LDSC genetic corr EUR
S7. Genetic correlation between pubertal growth phenotypes as determined by LDSC.
	I	II	III	IV	V	VI
I	1	-0.00765883	-0.0122084	0.159806	-0.0999656	0.114315
II	-0.00765883	1	0.110579	0.0290544	0.0111994	-0.00343903
III	-0.0122084	0.110579	1	0.0393	0.0458107	-0.108136
IV	0.159806	0.0290544	0.0393	1	0.351508	0.0711434
V	-0.0999656	0.0111994	0.0458107	0.351508	1	-0.123069
VI	0.114315	-0.00343903	-0.108136	0.0711434	-0.123069	1

## Sheet: S8 PRS_variance_explained
S8. Proportion of the phenotypic variance explained in the CAG cohort by the PRS.
Phenotype-sex	Threshold	PRS.R2
1 - female	0.1924	0.026
1 - male	0.22445	0.013
1 - all	0.00750005	0.0044
4 - female	0.2066	0.011
4 - male	0.2567	0.01
4 - all	0.1462	0.016
5 - female	0.0247001	0.0011
5 - male	0.1067	0.0013
5 - all	0.00050005	0.00056
6 - female	0.1762	0.0017
6 - male	0.25345	0.0038
6 - all	0.20065	0.0045

[truncated: 3 more sheets: S9 PMBB PheWAS, S10 UKBB PheWAS, S11 Lambda values]
